# Supplementary material for: Soft Scorpionate Hydridotris(2‐mercapto‐1‐methylimidazolyl) borate) Tungsten‐Oxido and ‐Sulfido Complexes as Acetylene Hydratase Models
Source: PubMed Central journal article supplement — Chemistry. 2020 Sep 7;26(54):12431–44. doi: 10.1002/chem.202001127 (PMC7589279; doi:10.1002/chem.202001127), 2020-09-07
Supplement: CHEM-26-12431-s001.pdf [file CHEM-26-12431-s001.pdf]

# Chemistry–A European Journal

Supporting Information

## **Soft Scorpionate Hydridotris(2-mercapto-1-methylimidazolyl) borate) Tungsten-Oxido and -Sulfido Complexes as Acetylene Hydratase Models**

Carina Vidovič, Ferdinand Belaj, and Nadia C. Mösch-Zanetti\*<sup>[a]</sup>

## **TABLE OF CONTENTS:**

|          |                                                      |           |
|----------|------------------------------------------------------|-----------|
| <b>1</b> | <b><i>Experimental Section</i></b> .....             | <b>2</b>  |
| <b>2</b> | <b><i>NMR spectra</i></b> .....                      | <b>3</b>  |
| <b>3</b> | <b><i>High-resolution mass spectra</i></b> .....     | <b>26</b> |
| <b>4</b> | <b><i>Crystal Structure Determinations</i></b> ..... | <b>47</b> |
|          | 4.1 <i>Stereoscopic ORTEP plots</i> .....            | 55        |
|          | 4.2 <i>Selected bond lengths and angels</i> .....    | 64        |
| <b>5</b> | <b><i>References</i></b> .....                       | <b>71</b> |

# 1 EXPERIMENTAL SECTION

---

**Table S1:** Behavior of Complexes 1,2 and 4-15 in wet solvents.

|           | <i>Complex</i>                                                                                                            | <i>Time</i>     | <i>Behavior</i>                                                          |
|-----------|---------------------------------------------------------------------------------------------------------------------------|-----------------|--------------------------------------------------------------------------|
| <b>1</b>  | [W(CO)(C <sub>2</sub> H <sub>2</sub> )(Tm <sup>Me</sup> )Br]                                                              | 24 h            | 20% oxidation to <b>4</b>                                                |
| <b>4</b>  | [WO(C <sub>2</sub> H <sub>2</sub> )(Tm <sup>Me</sup> )Br]                                                                 | 5 days          | 30% decomposition to free 2-butyne                                       |
| <b>6</b>  | [WS(C <sub>2</sub> H <sub>2</sub> )(Tm <sup>Me</sup> )Br]                                                                 | 5 h<br>24 h     | Formation of 60% of <b>4</b><br>full decomposition                       |
| <b>7</b>  | [WS(C <sub>2</sub> Me <sub>2</sub> )(Tm <sup>Me</sup> )Br]                                                                | 24 h            | full conversion to <b>13</b>                                             |
| <b>8</b>  | [W <sub>2</sub> O(μ-O)(C <sub>2</sub> Me <sub>2</sub> ) <sub>2</sub> (Tm <sup>Me</sup> ) <sub>2</sub> ](OTf) <sub>2</sub> | 24 h            | decomposition to beige precipitate but majority of complex still present |
| <b>9</b>  | [W <sub>2</sub> (μ-S) <sub>2</sub> (C <sub>2</sub> Me <sub>2</sub> )(Tm <sup>Me</sup> ) <sub>2</sub> ](OTf) <sub>2</sub>  | 7 days          | no changes                                                               |
| <b>10</b> | [W(CO)(C <sub>2</sub> H <sub>2</sub> )(MeCN)(Tm <sup>Me</sup> )](OTf)                                                     | 24 h            | minor decomposition to <b>4</b>                                          |
| <b>11</b> | [W(CO)(C <sub>2</sub> Me <sub>2</sub> )(MeCN)(Tm <sup>Me</sup> )](OTf)                                                    | 24 h            | no changes                                                               |
| <b>12</b> | [WO(C <sub>2</sub> H <sub>2</sub> )(MeCN)(Tm <sup>Me</sup> )](OTf)                                                        | 24 h<br>10 days | no significant changes<br>complex still present                          |
| <b>13</b> | [WO(C <sub>2</sub> Me <sub>2</sub> )(MeCN)(Tm <sup>Me</sup> )](OTf)                                                       | 24 h<br>10 days | 13% decomposition<br>complex still present                               |
| <b>14</b> | [WS(C <sub>2</sub> H <sub>2</sub> )(MeCN)(Tm <sup>Me</sup> )](OTf)                                                        | 2 h             | 46% conversion to <b>12</b> and decomposition                            |
| <b>15</b> | [WS(C <sub>2</sub> Me <sub>2</sub> )(MeCN)(Tm <sup>Me</sup> )](OTf)                                                       | 1 h             | full conversion to <b>13</b>                                             |

## 2 NMR SPECTRA

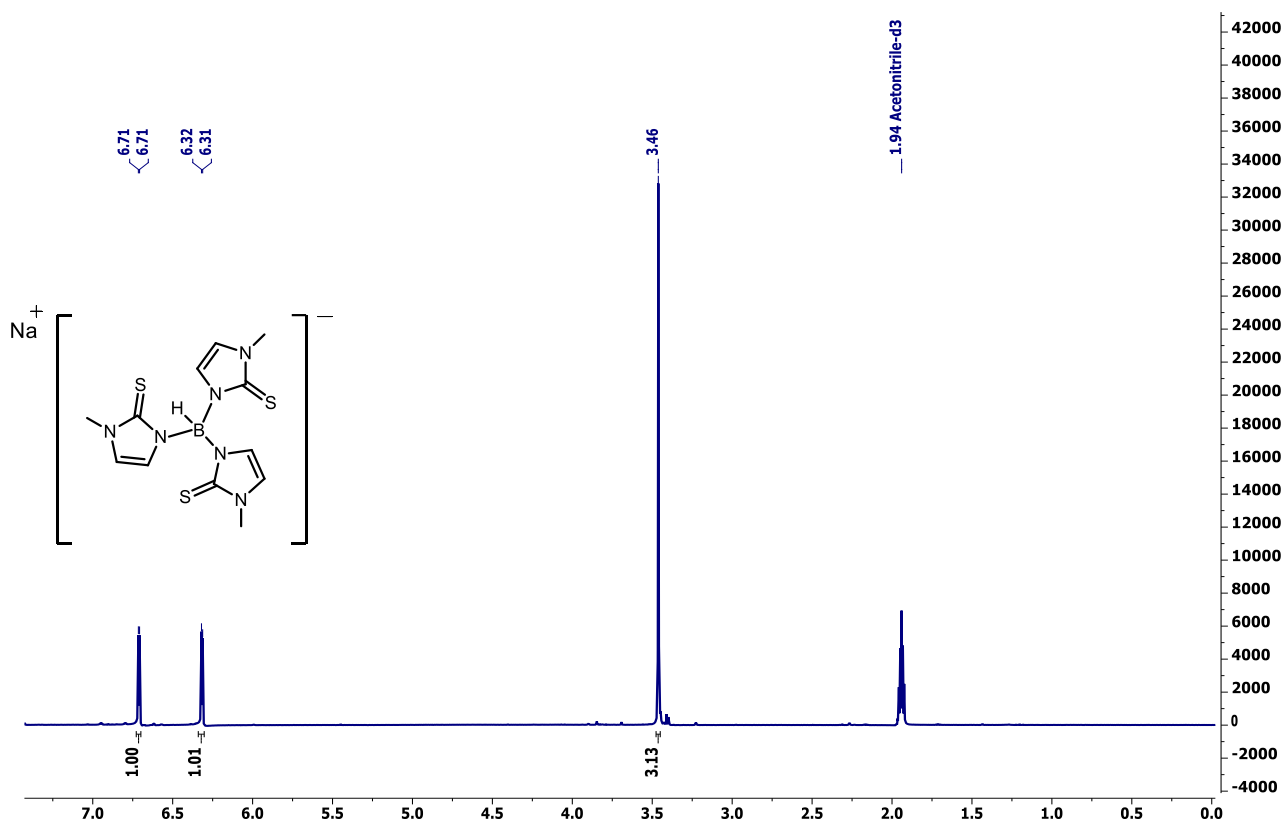

Figure S1:  $^1\text{H}$  NMR spectrum of  $\text{NaTm}^{\text{Me}}$  in  $\text{CD}_3\text{CN}$ .

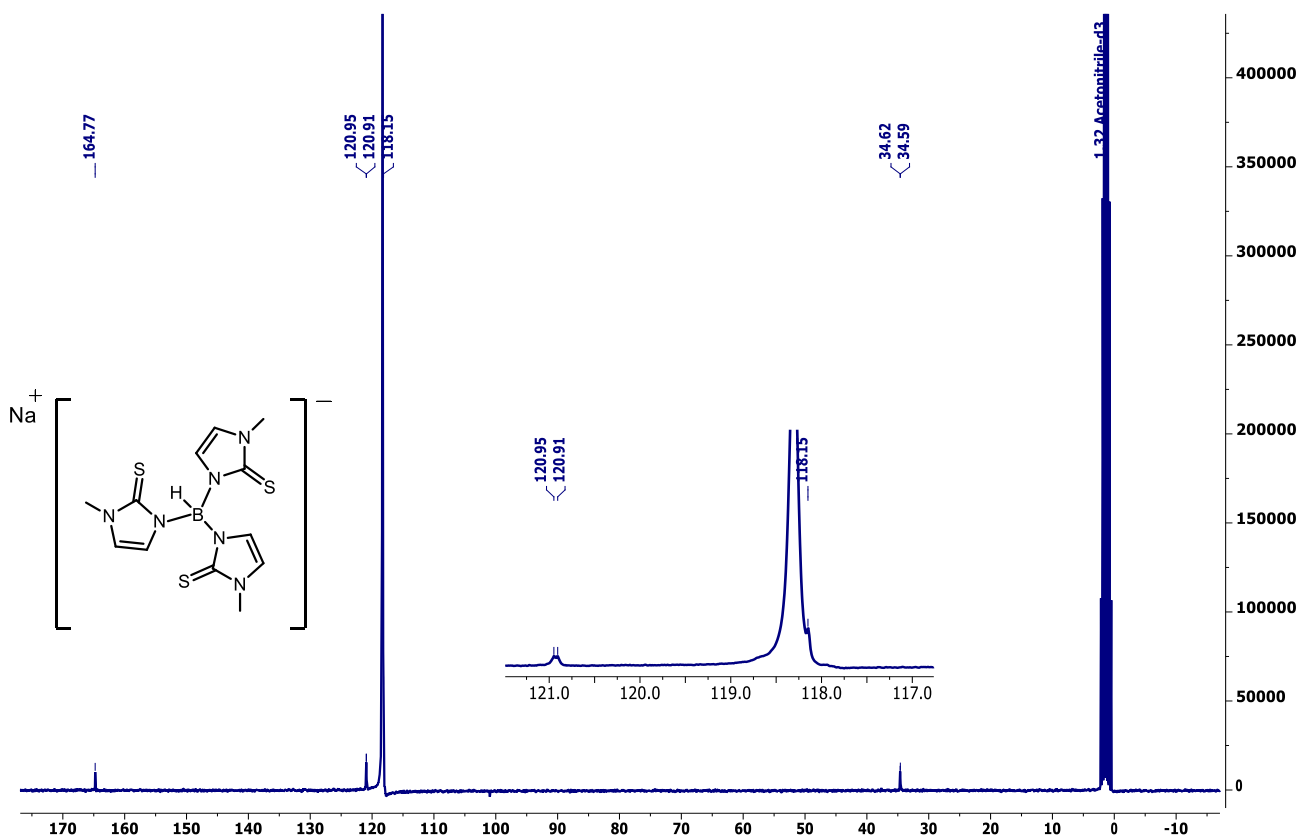

Figure S2:  $^{13}\text{C}$  NMR spectrum of  $\text{NaTm}^{\text{Me}}$  in  $\text{CD}_3\text{CN}$ .



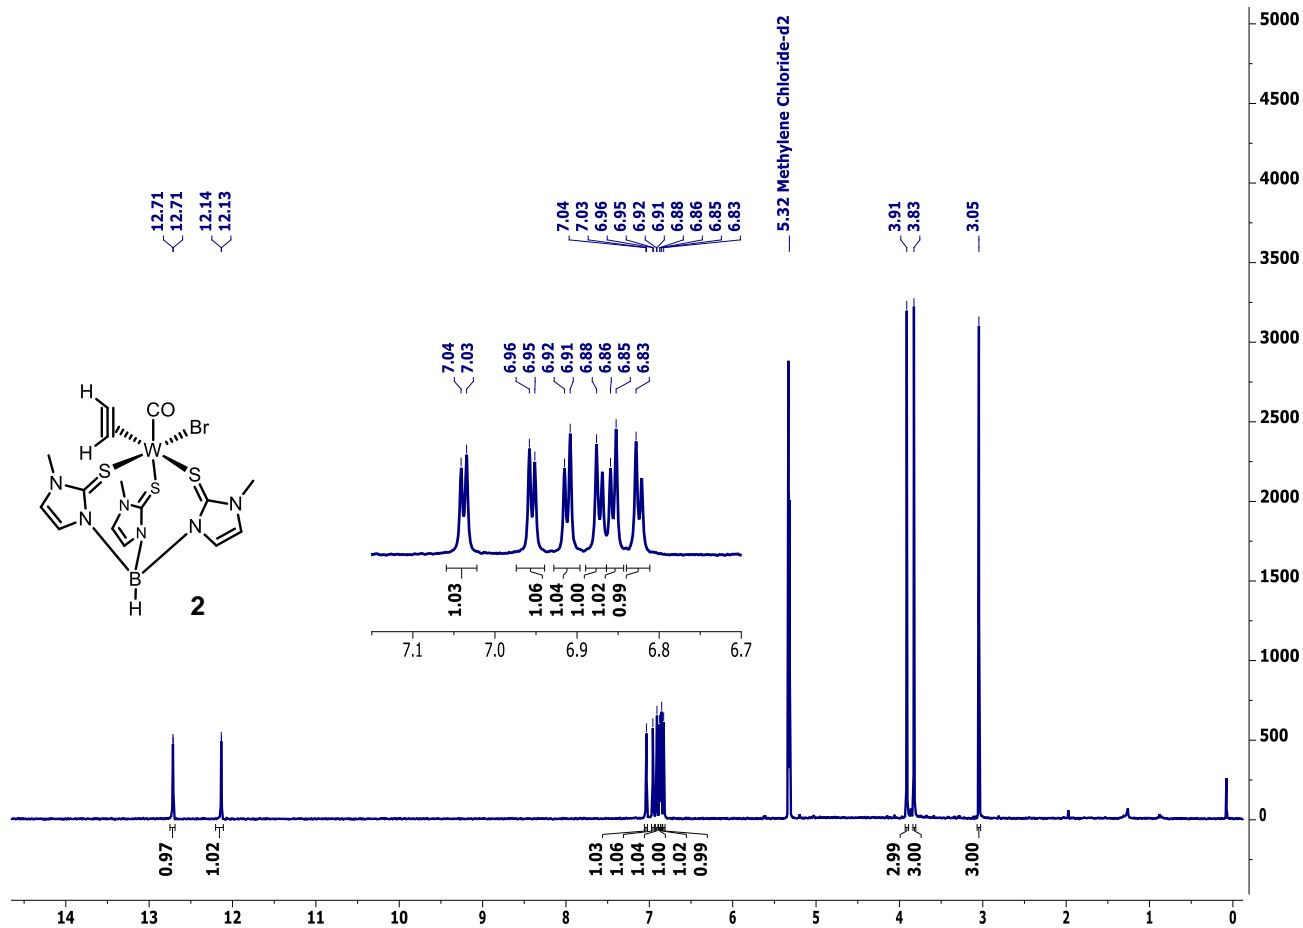

**Figure S3:**  $^1\text{H}$  NMR spectrum of  $[\text{W}(\text{CO})(\text{C}_2\text{H}_2)(\text{Tm}^{\text{Me}})\text{Br}]$  (**1**) in  $\text{CD}_2\text{Cl}_2$ .

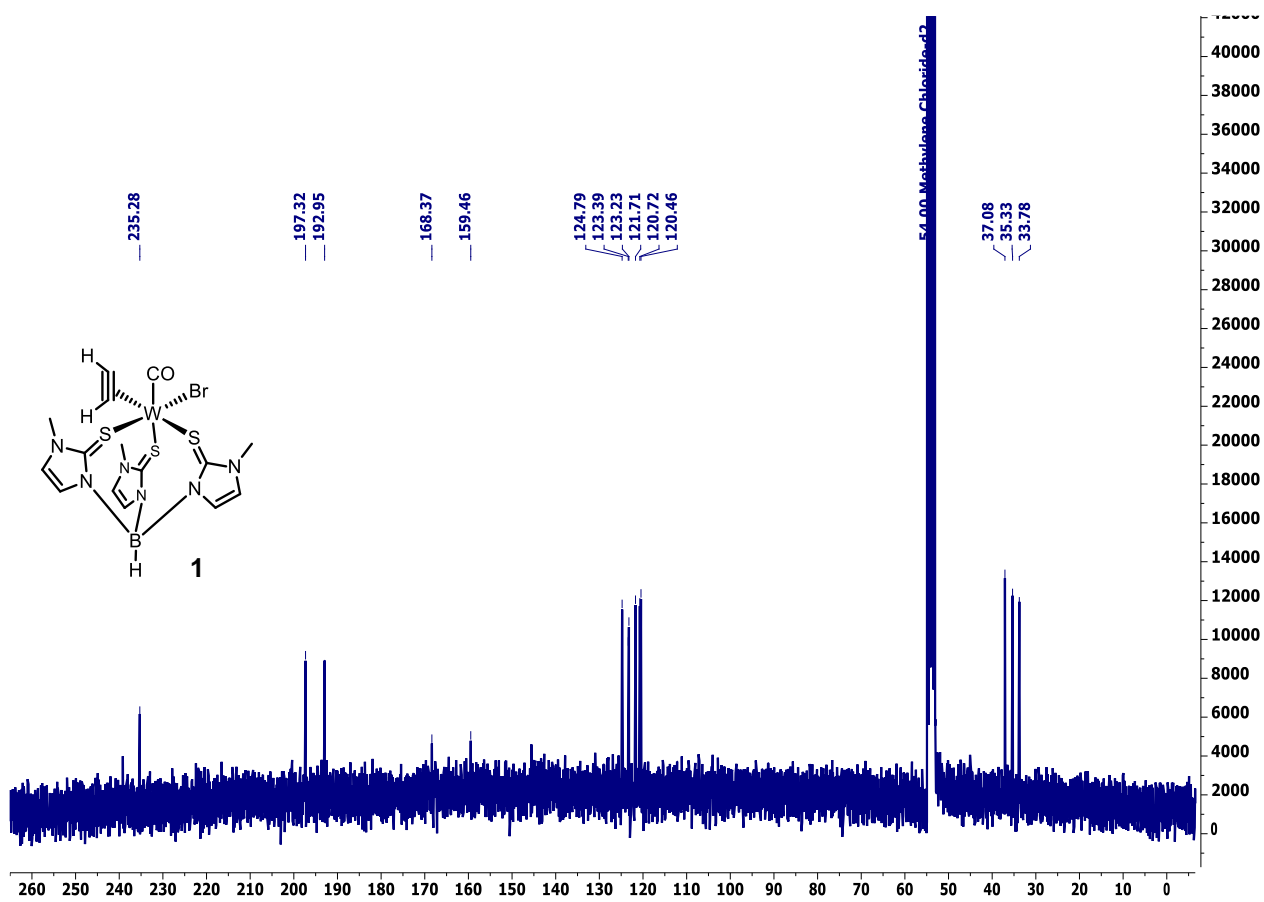

**Figure S4:**  $^{13}\text{C}$  NMR spectrum of  $[\text{W}(\text{CO})(\text{C}_2\text{H}_2)(\text{Tm}^{\text{Me}})\text{Br}]$  (**1**) in  $\text{CD}_2\text{Cl}_2$ .

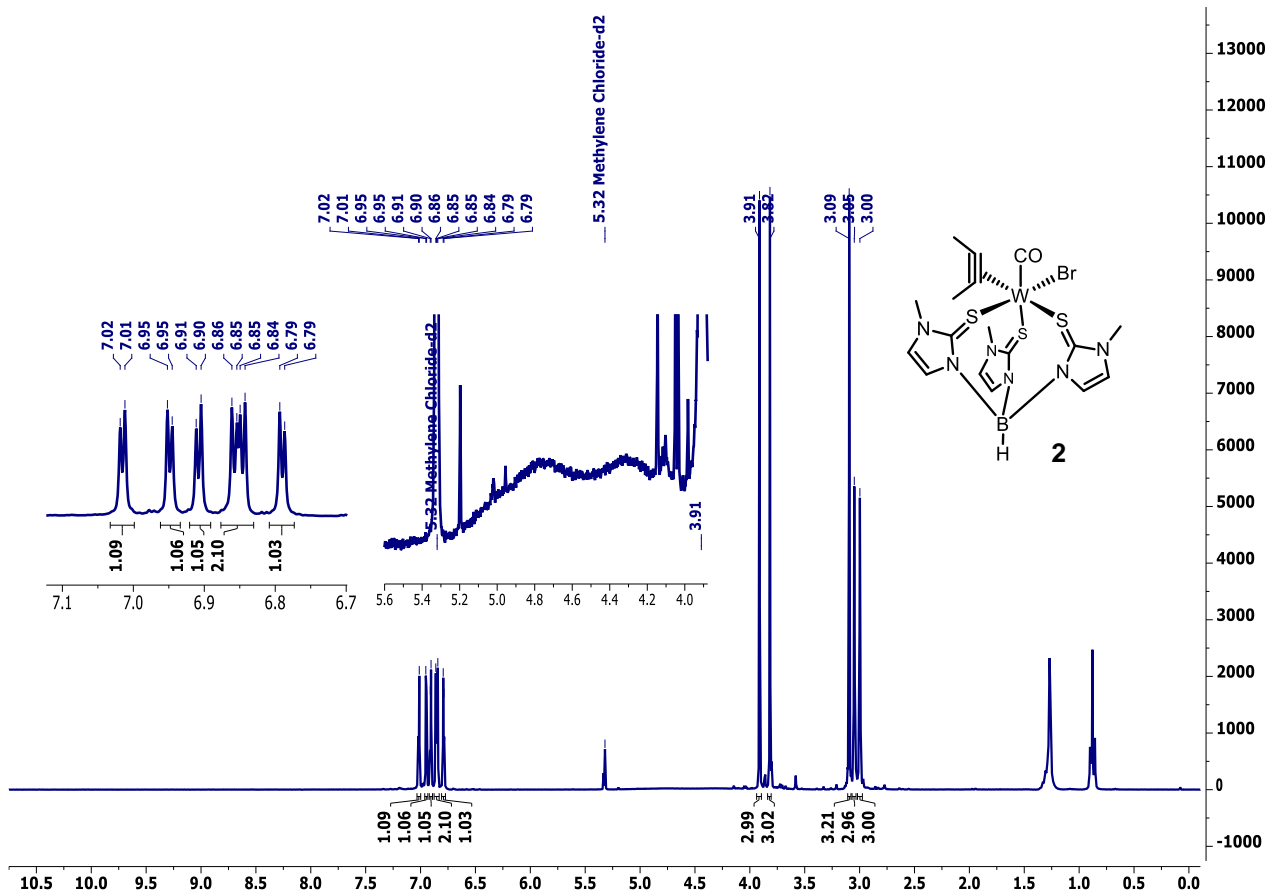

Figure S5:  $^1\text{H}$  NMR spectrum of  $[\text{W}(\text{CO})(\text{C}_2\text{Me}_2)(\text{Tm}^{\text{Me}})\text{Br}]$  (**2**) in  $\text{CD}_2\text{Cl}_2$ .

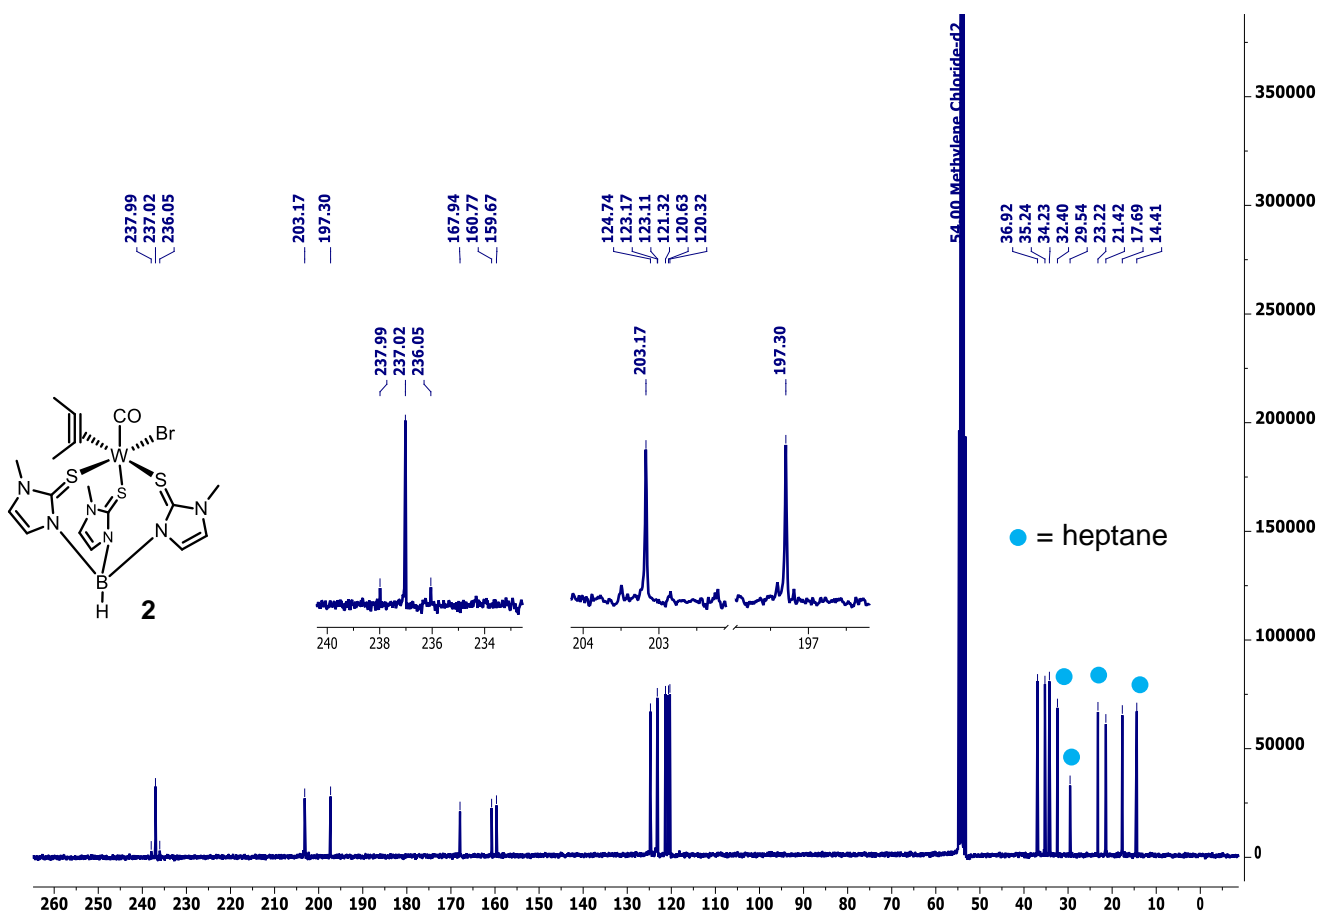

Figure S6:  $^{13}\text{C}$  NMR spectrum of  $[\text{W}(\text{CO})(\text{C}_2\text{Me}_2)(\text{Tm}^{\text{Me}})\text{Br}]$  (**2**) in  $\text{CD}_2\text{Cl}_2$ .

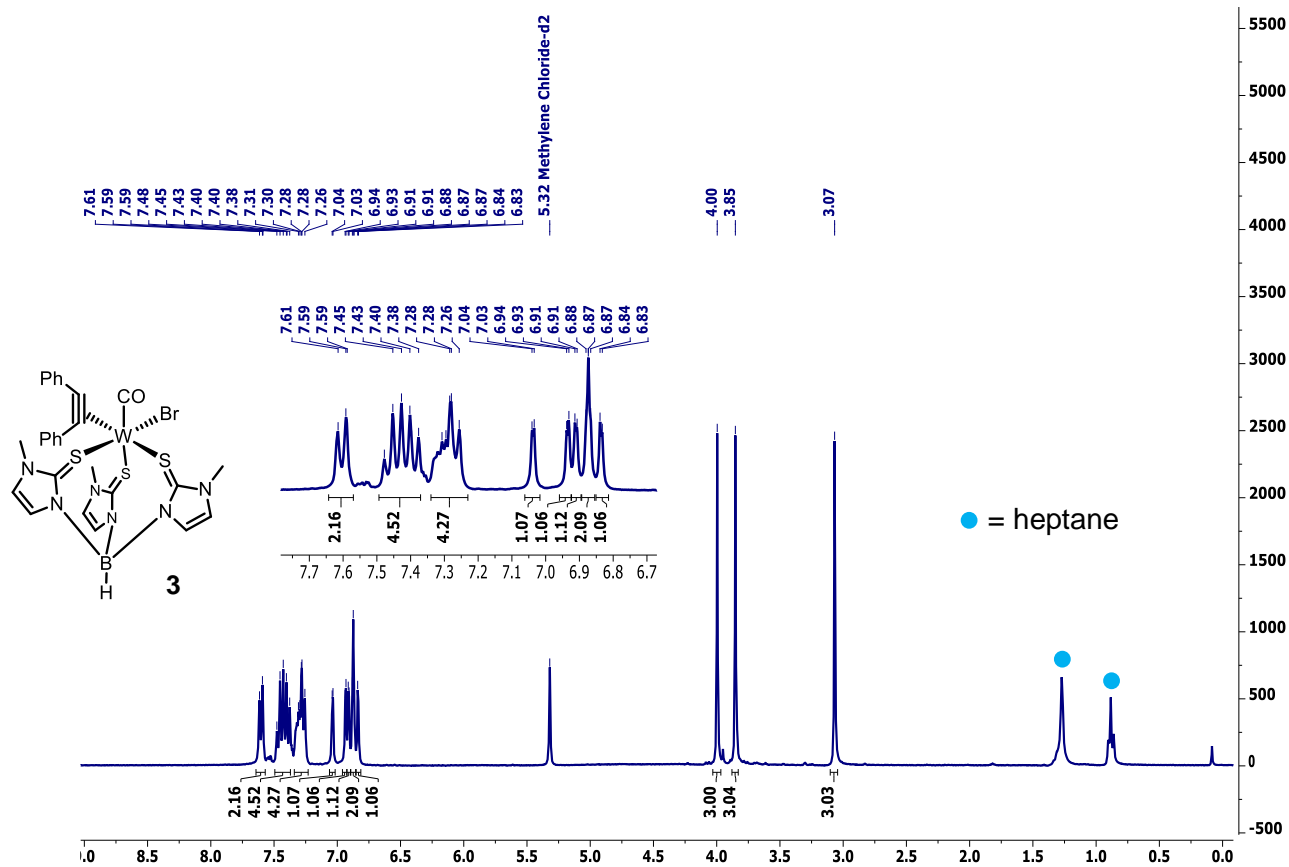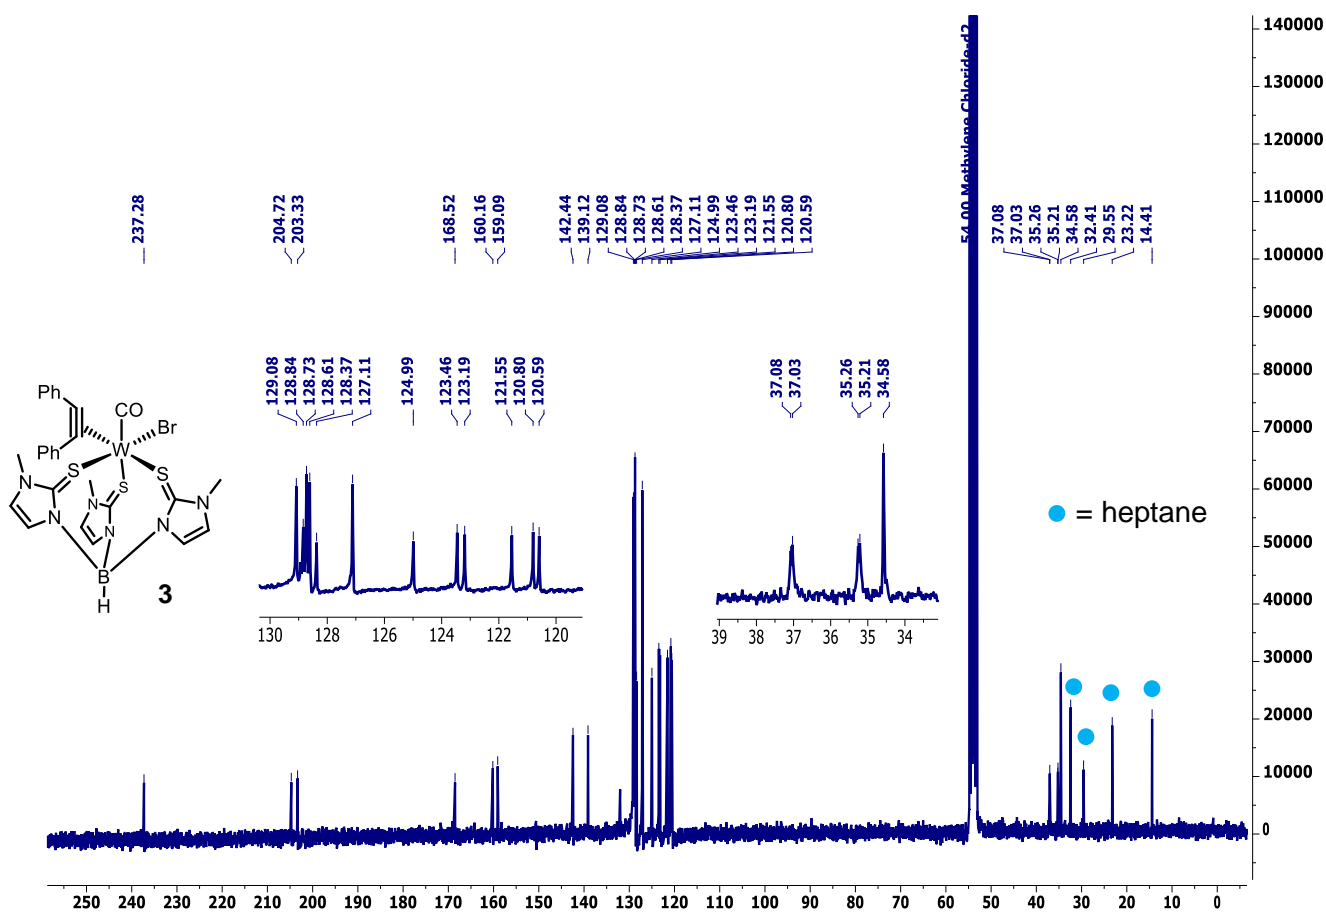

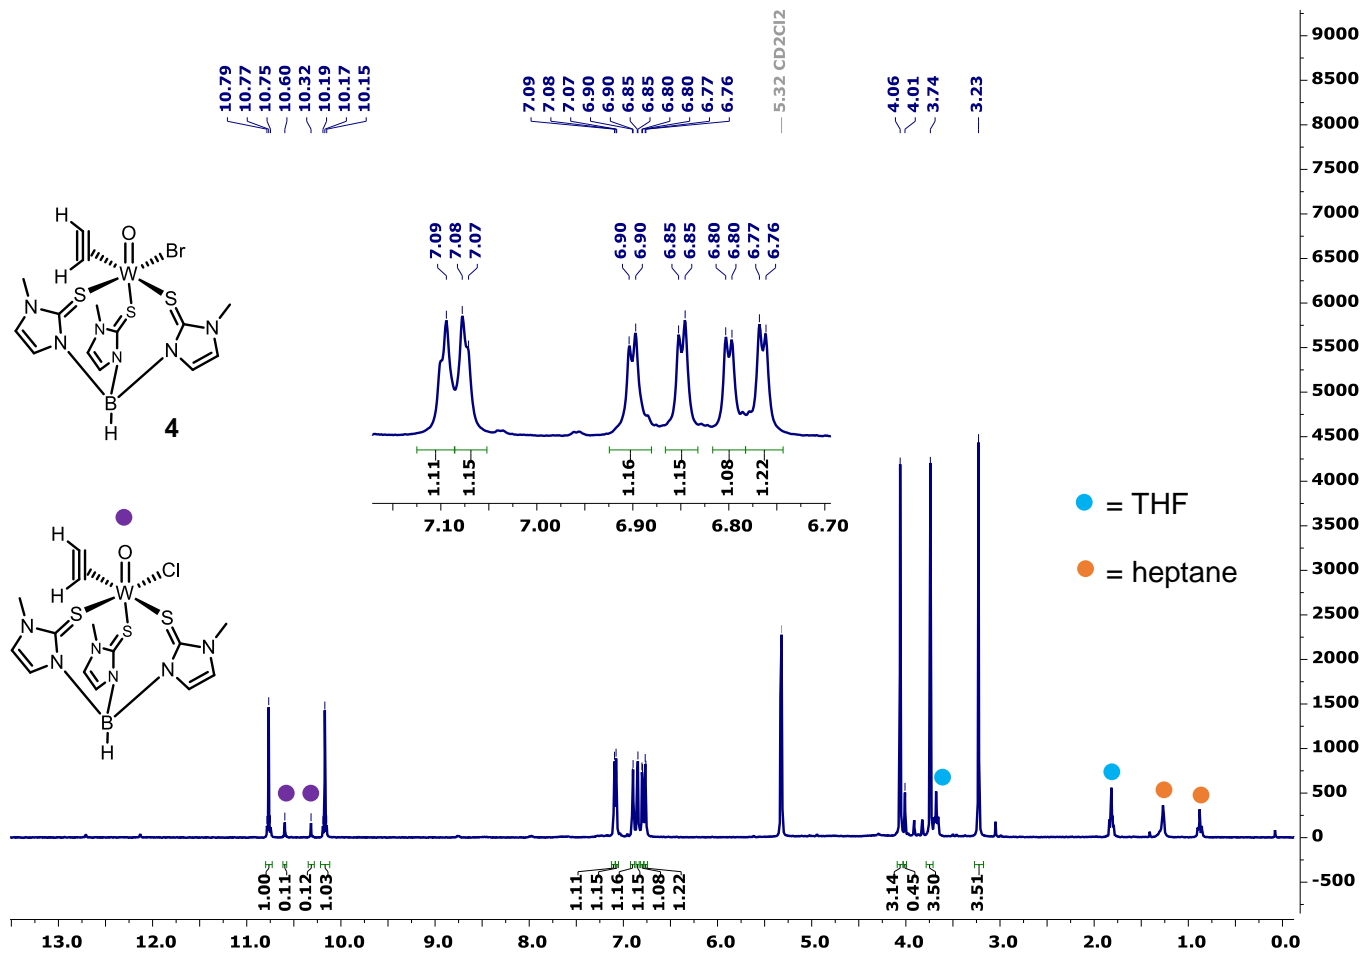

Figure S9: <sup>1</sup>H NMR spectrum of [WO(C<sub>2</sub>H<sub>2</sub>)(Tm<sup>Me</sup>)Br] (4) in CD<sub>2</sub>Cl<sub>2</sub>.

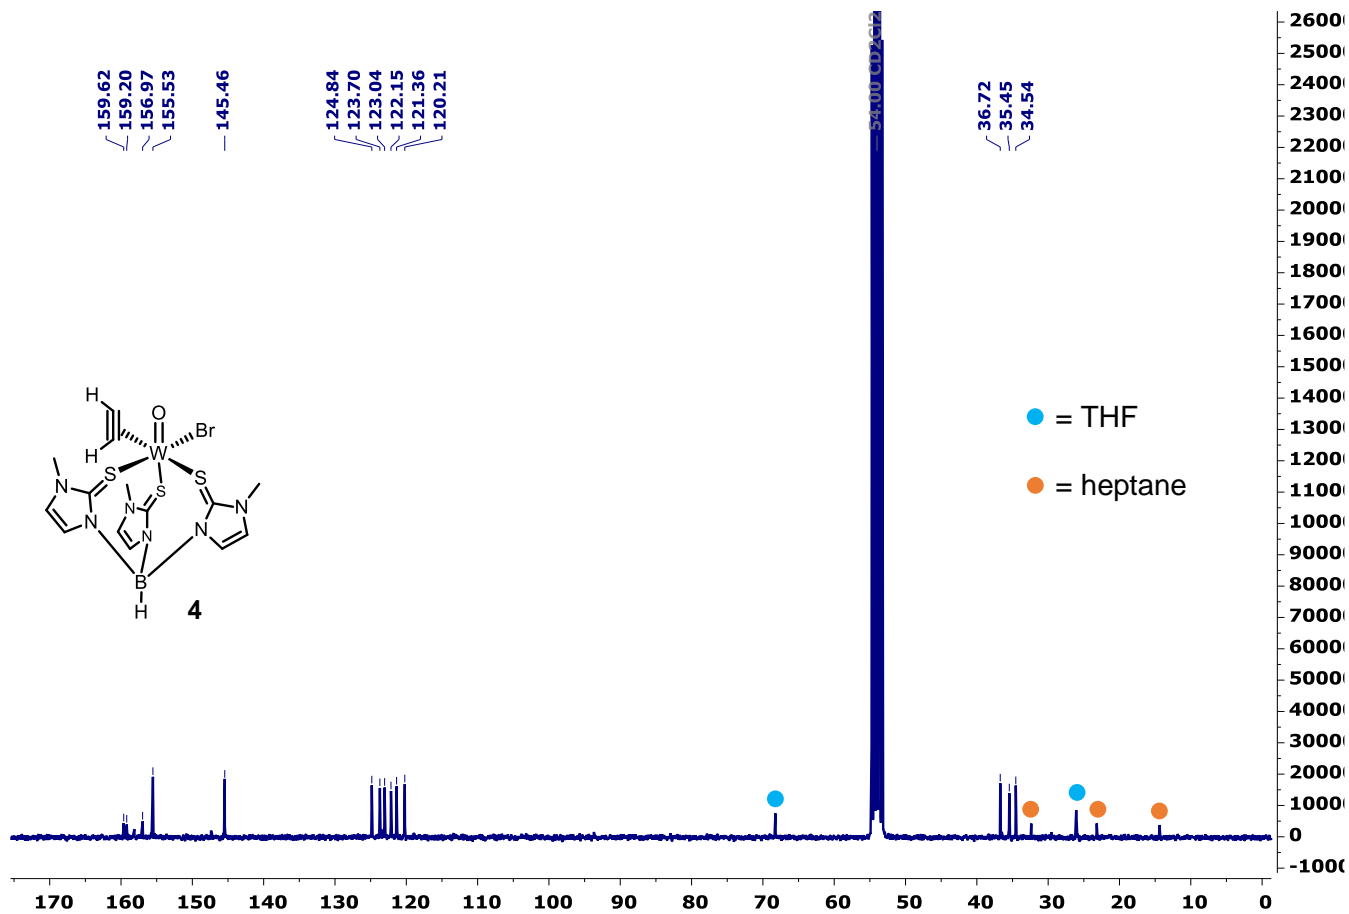

Figure S10: <sup>13</sup>C NMR spectrum of [WO(C<sub>2</sub>H<sub>2</sub>)(Tm<sup>Me</sup>)Br] (4) in CD<sub>2</sub>Cl<sub>2</sub>.

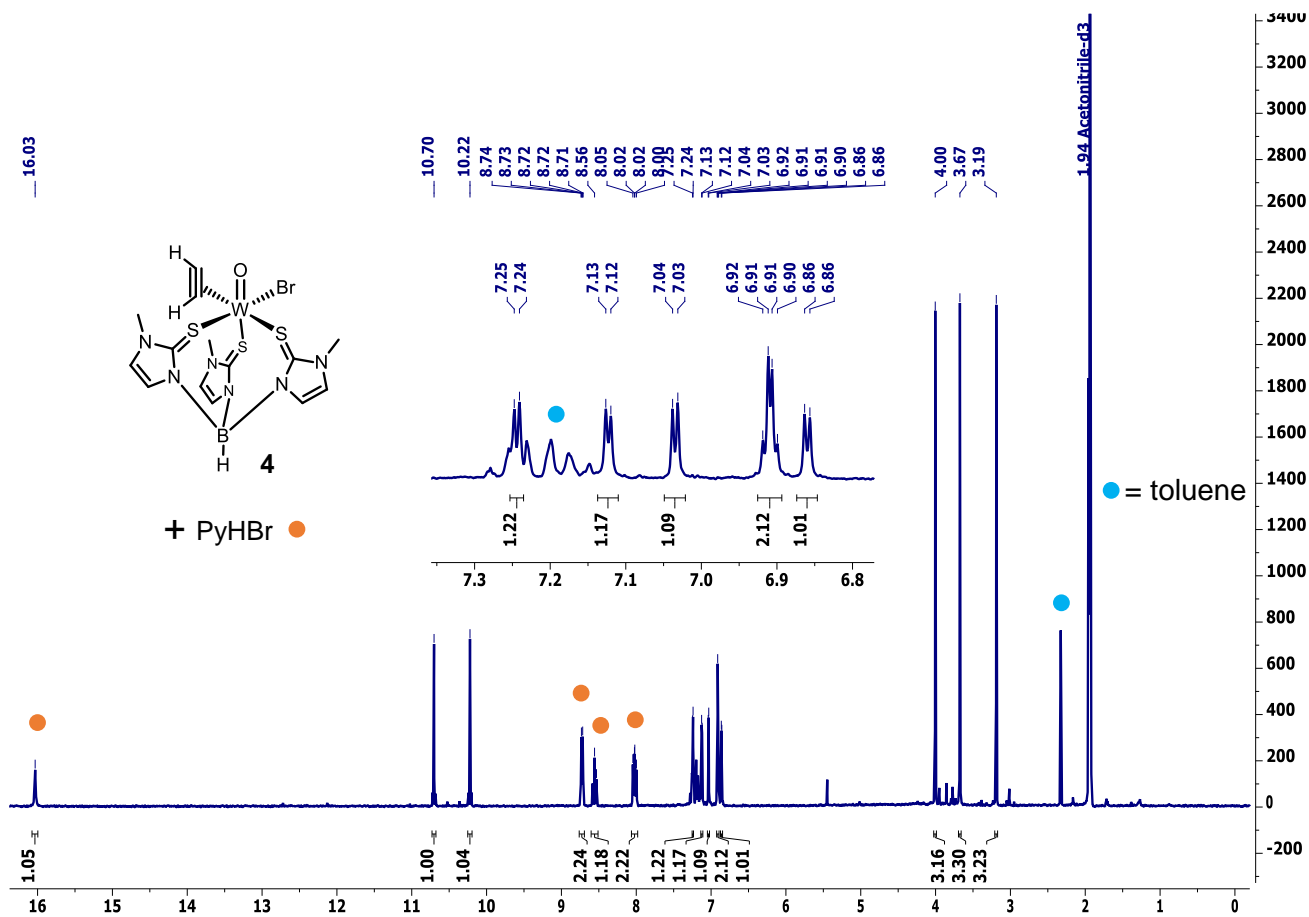

Figure S11:  $^1\text{H}$  NMR spectrum of  $[\text{WO}(\text{C}_2\text{H}_2)(\text{Tm}^{\text{Me}})\text{Br}] \cdot \text{PyHBr}$  (**4**) in  $\text{CD}_3\text{CN}$ .

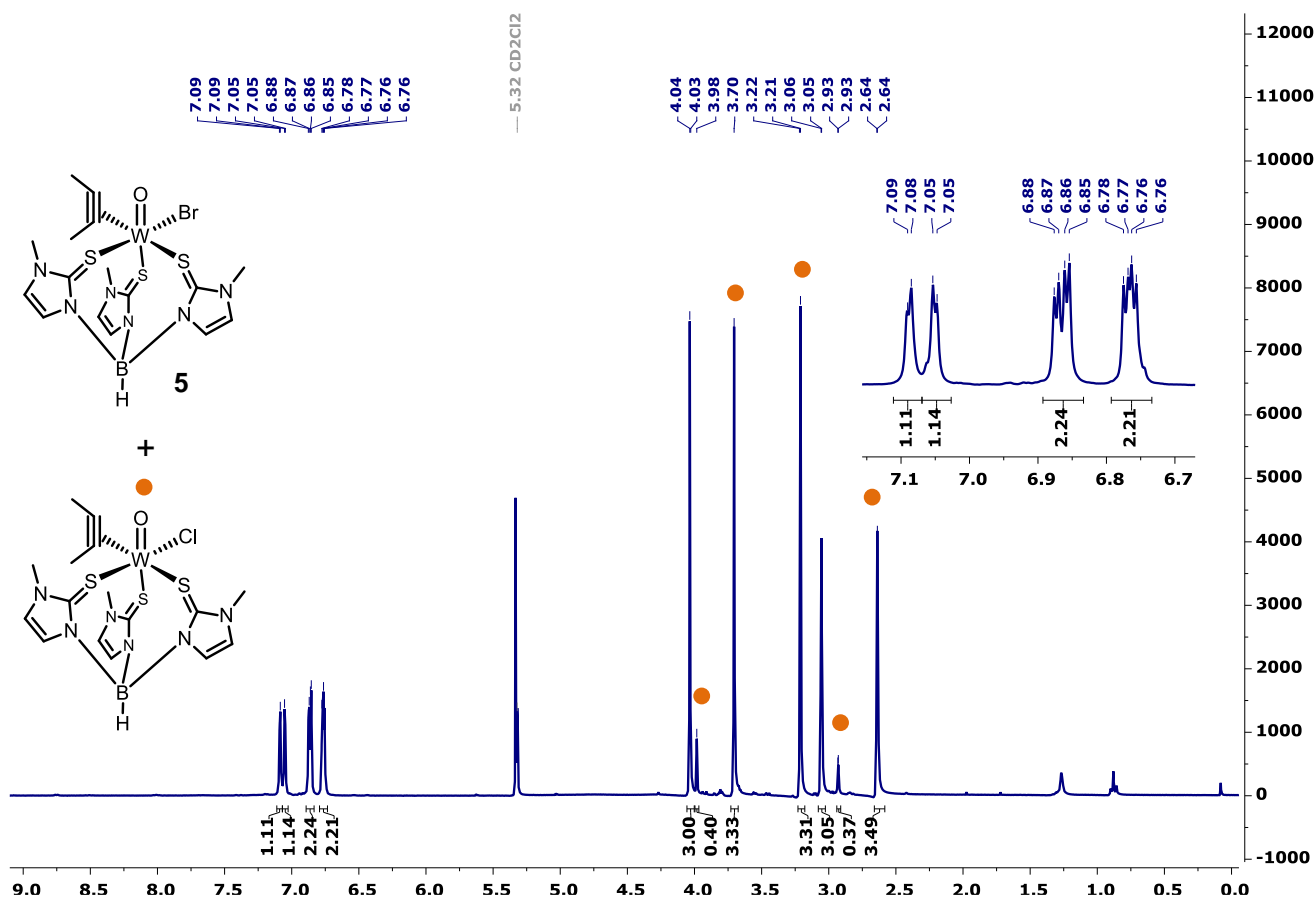

Figure S12:  $^1\text{H}$  NMR spectrum of  $[\text{WO}(\text{C}_2\text{Me}_2)(\text{Tm}^{\text{Me}})\text{Br}]$  (**5**) with small amounts of  $[\text{WO}(\text{C}_2\text{Me}_2)(\text{Tm}^{\text{Me}})\text{Cl}]$  in  $\text{CD}_2\text{Cl}_2$ .



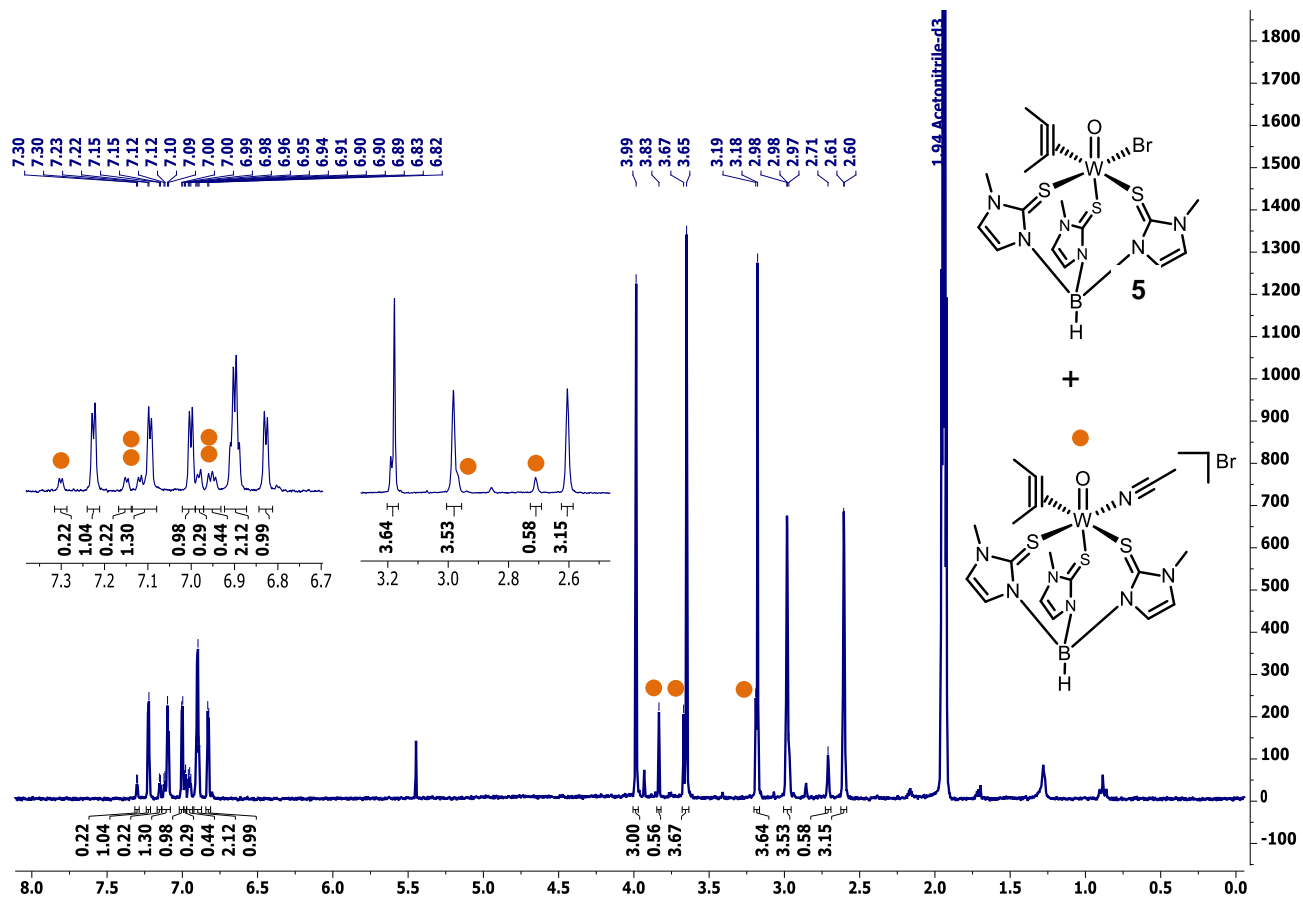

Figure S15:  $^1\text{H}$  NMR spectrum of  $[\text{WO}(\text{C}_2\text{Me}_2)(\text{Tm}^{\text{Me}})\text{Br}]$  (5) with small amounts of  $[\text{WO}(\text{C}_2\text{Me}_2)(\text{MeCN})(\text{Tm}^{\text{Me}})]\text{Br}$  in  $\text{MeCN-d}_3$ .

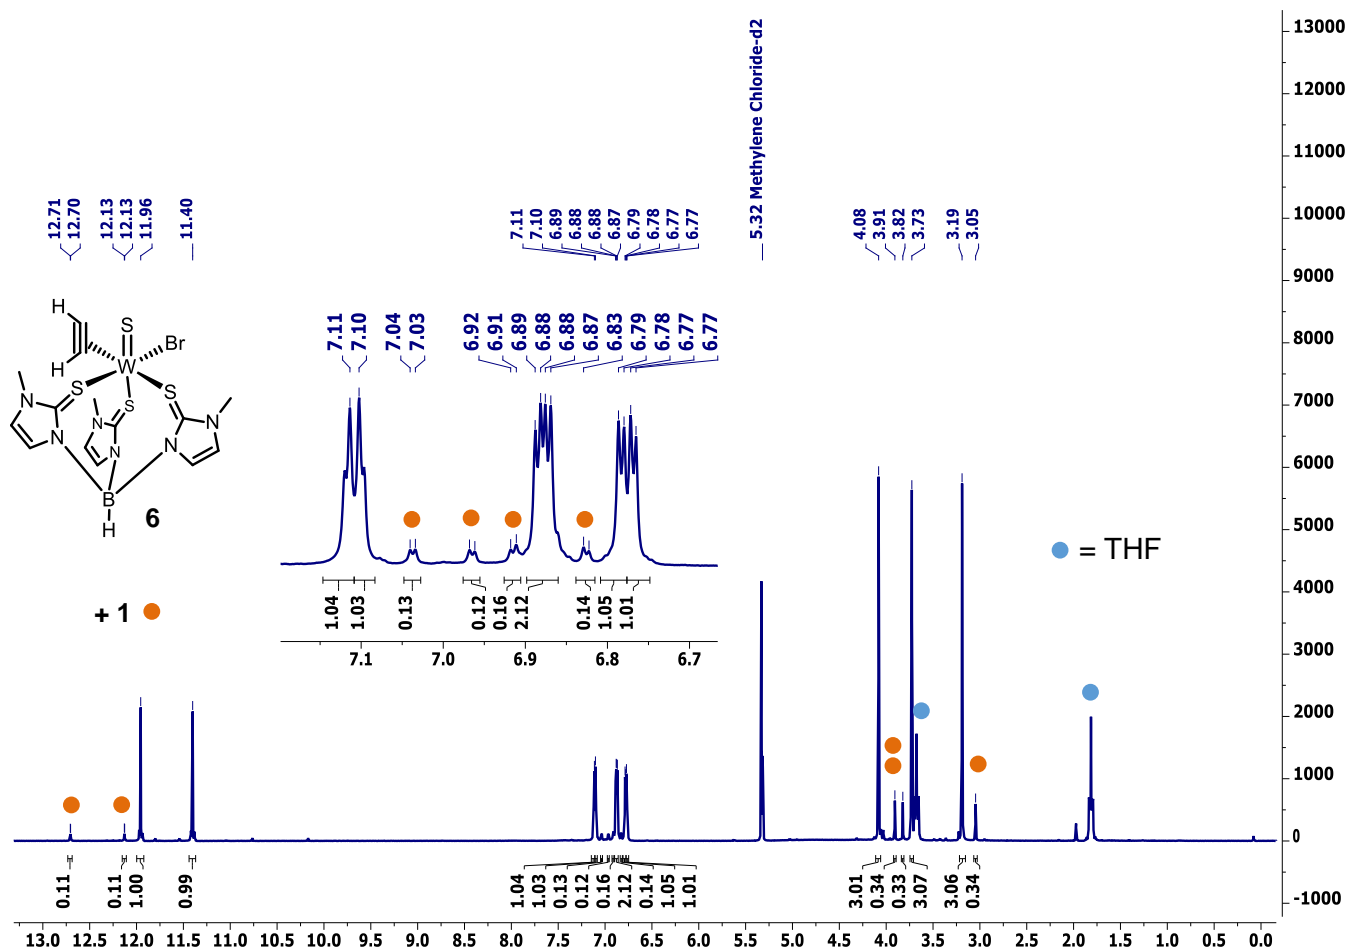

Figure S16:  $^1\text{H}$  NMR spectrum of  $[\text{WS}(\text{C}_2\text{H}_2)(\text{Tm}^{\text{Me}})\text{Br}]$  (6) in  $\text{CD}_2\text{Cl}_2$ .

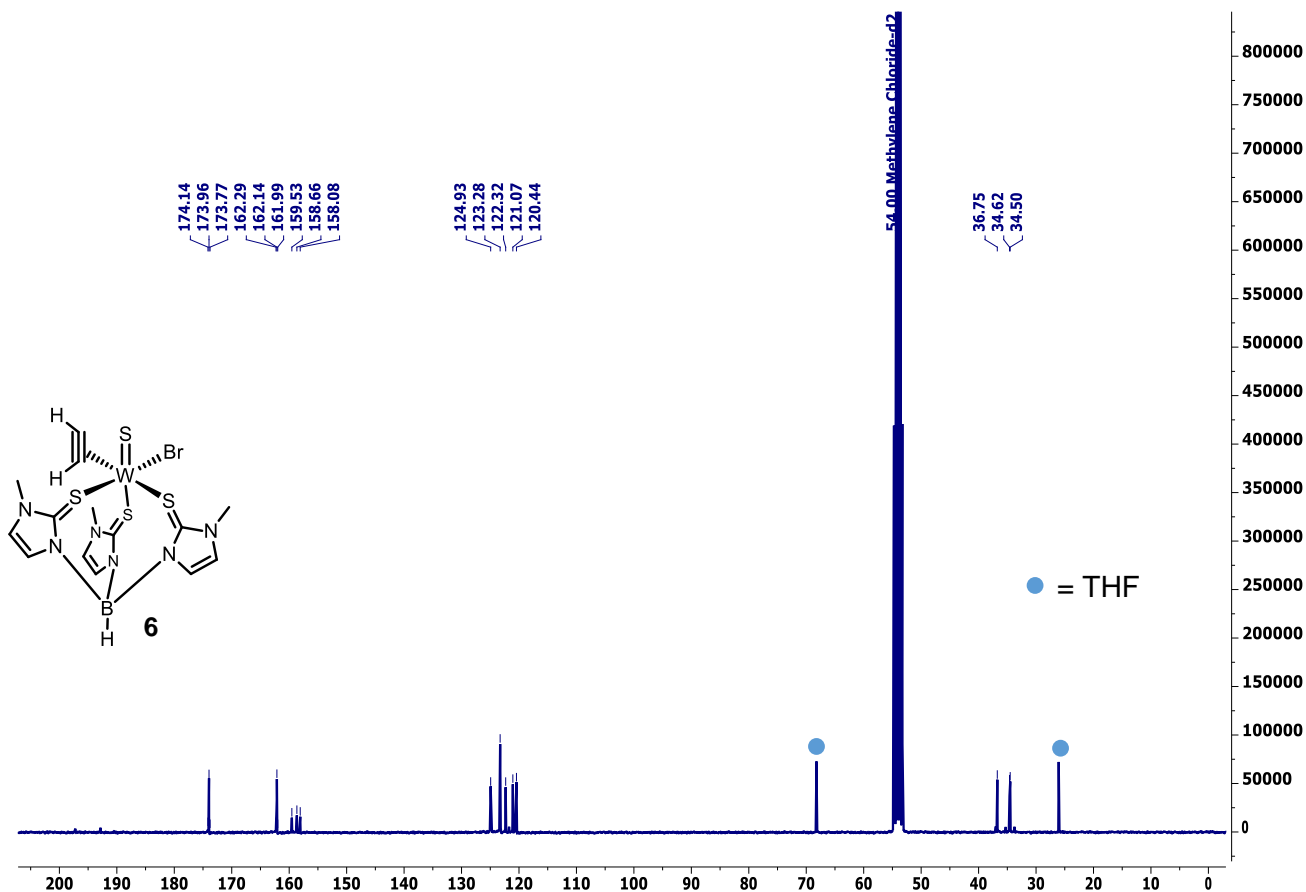

Figure S17:  $^{13}\text{C}$  NMR spectrum of  $[\text{WS}(\text{C}_2\text{H}_2)(\text{Tm}^{\text{Me}})\text{Br}]$  (**6**) in  $\text{CD}_2\text{Cl}_2$ .

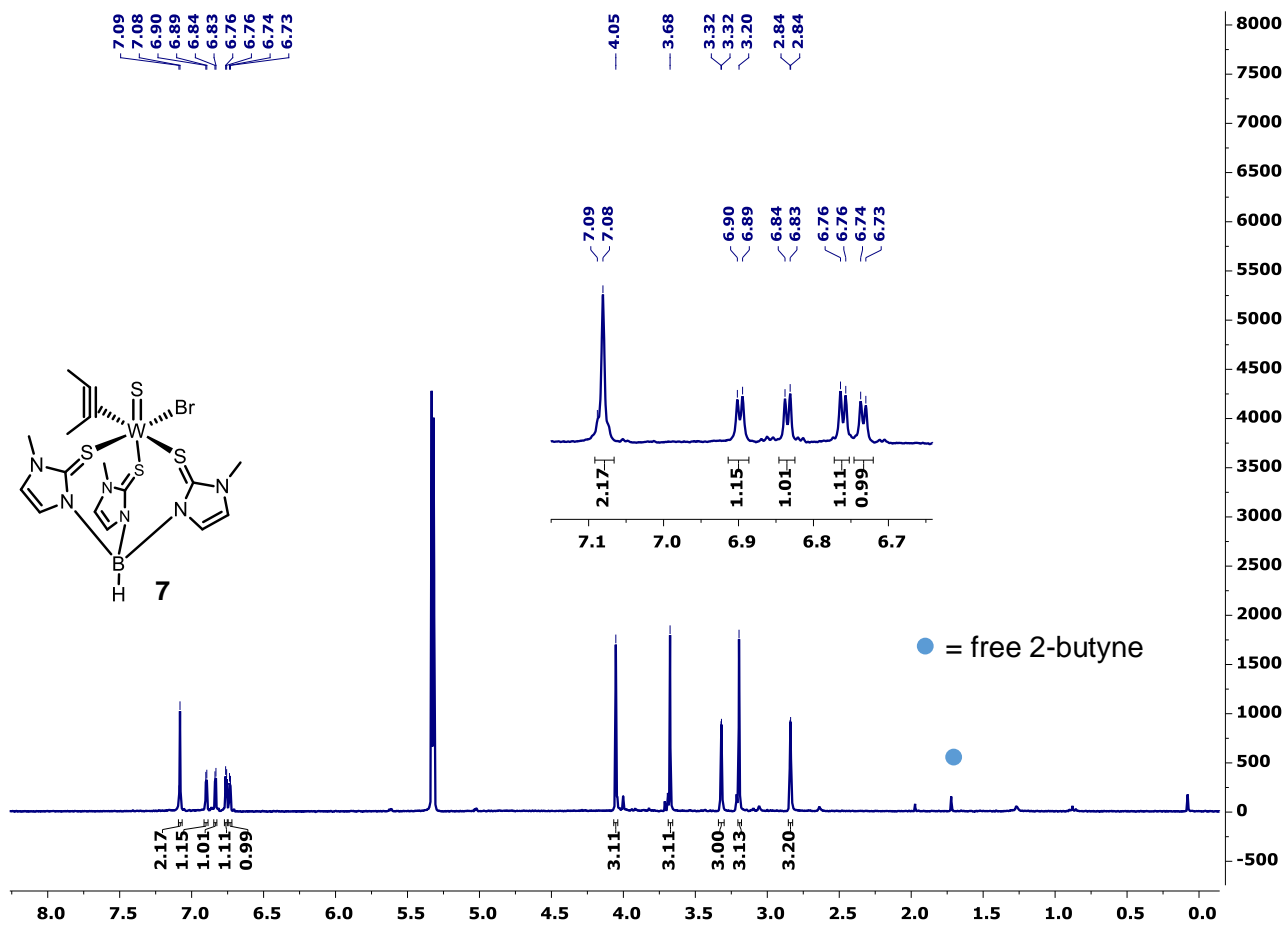

Figure S18:  $^1\text{H}$  NMR spectrum of  $[\text{WS}(\text{C}_2\text{Me}_2)(\text{Tm}^{\text{Me}})\text{Br}]$  (**7**) in  $\text{CD}_2\text{Cl}_2$ .



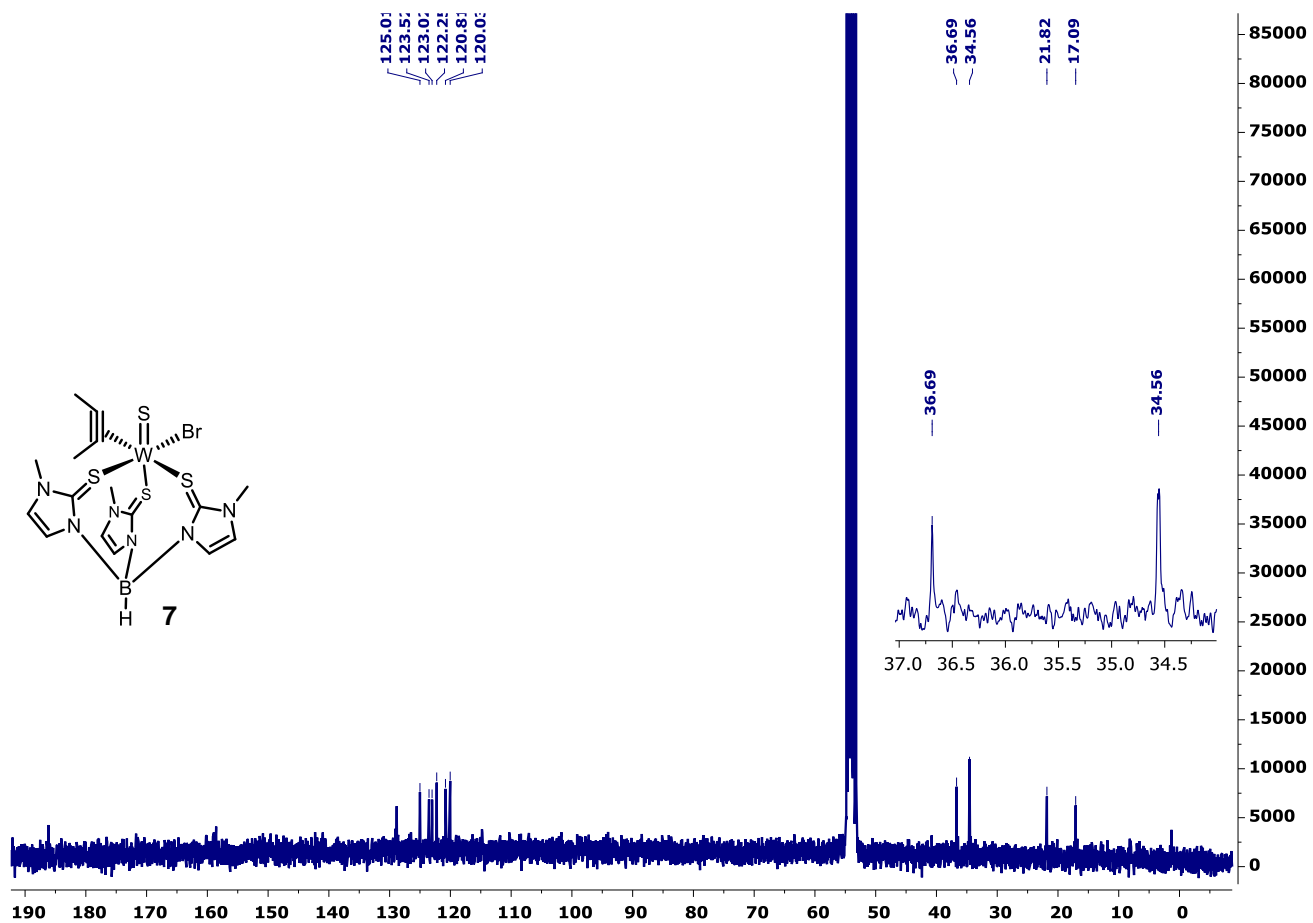

Figure S19:  $^{13}\text{C}$  NMR spectrum of  $[\text{WS}(\text{C}_2\text{Me}_2)(\text{Tm}^{\text{Me}})\text{Br}]$  (**7**) in  $\text{CD}_2\text{Cl}_2$ .

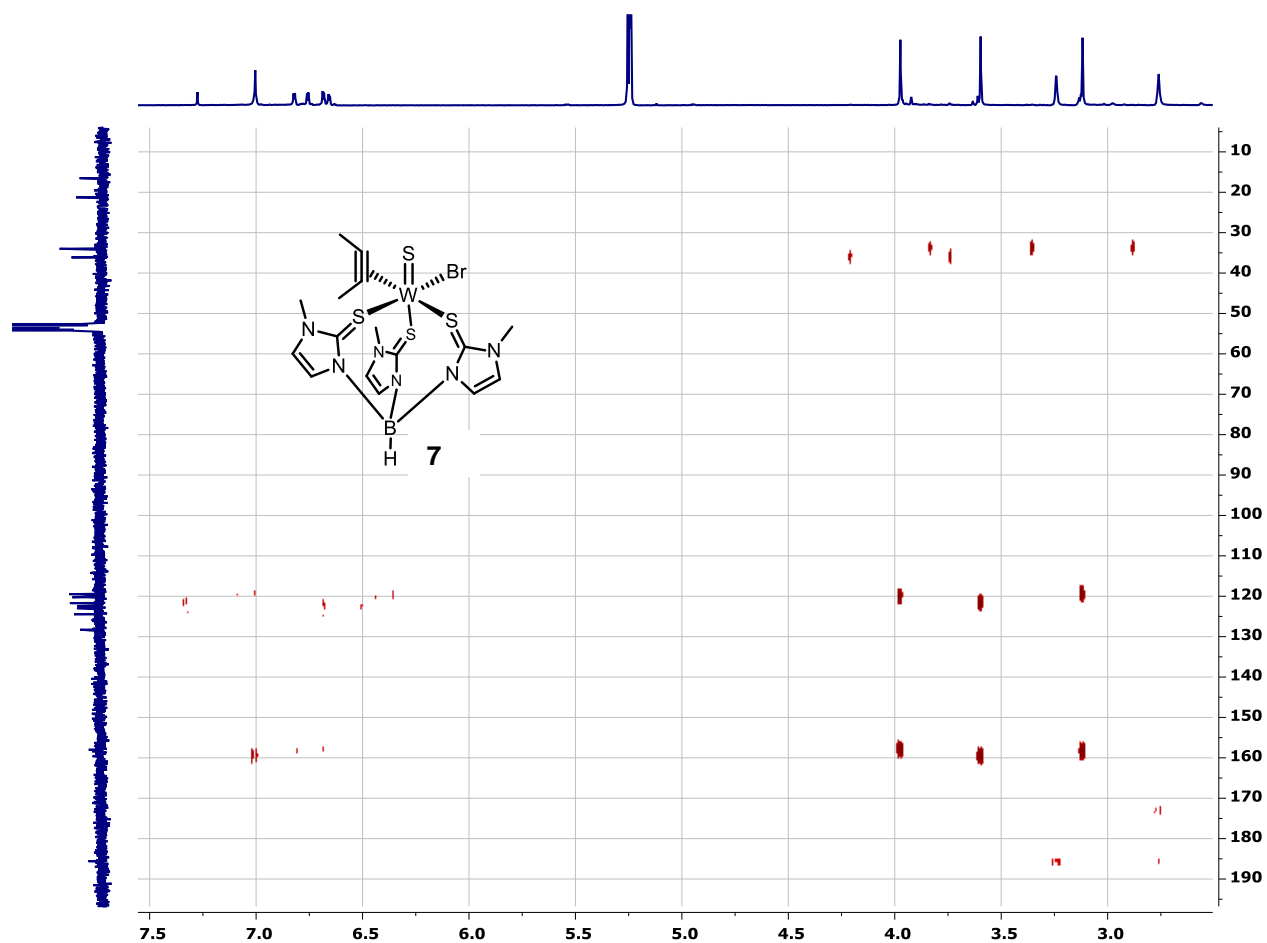

Figure S20: HMBC NMR spectrum of  $[\text{WS}(\text{C}_2\text{Me}_2)(\text{Tm}^{\text{Me}})\text{Br}]$  (**7**) in  $\text{CD}_2\text{Cl}_2$ .

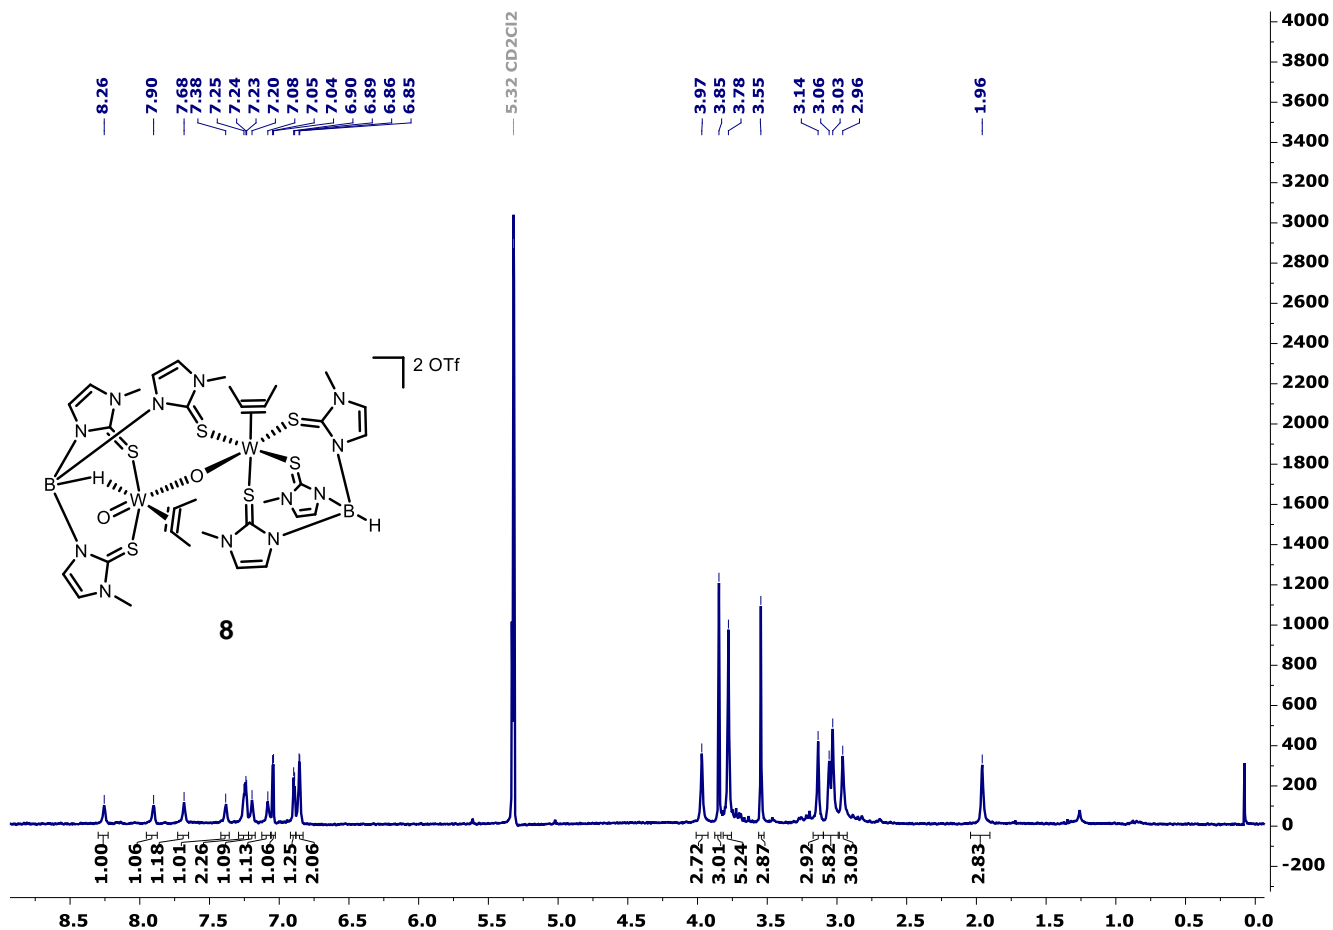

**Figure S21:**  $^1\text{H}$  NMR spectrum of  $[\text{W}_2\text{O}(\mu\text{-O})(\text{C}_2\text{Me}_2)_2(\text{Tm}^{\text{Me}})_2](\text{OTf})_2$  (**8**) in  $\text{CD}_2\text{Cl}_2$ .

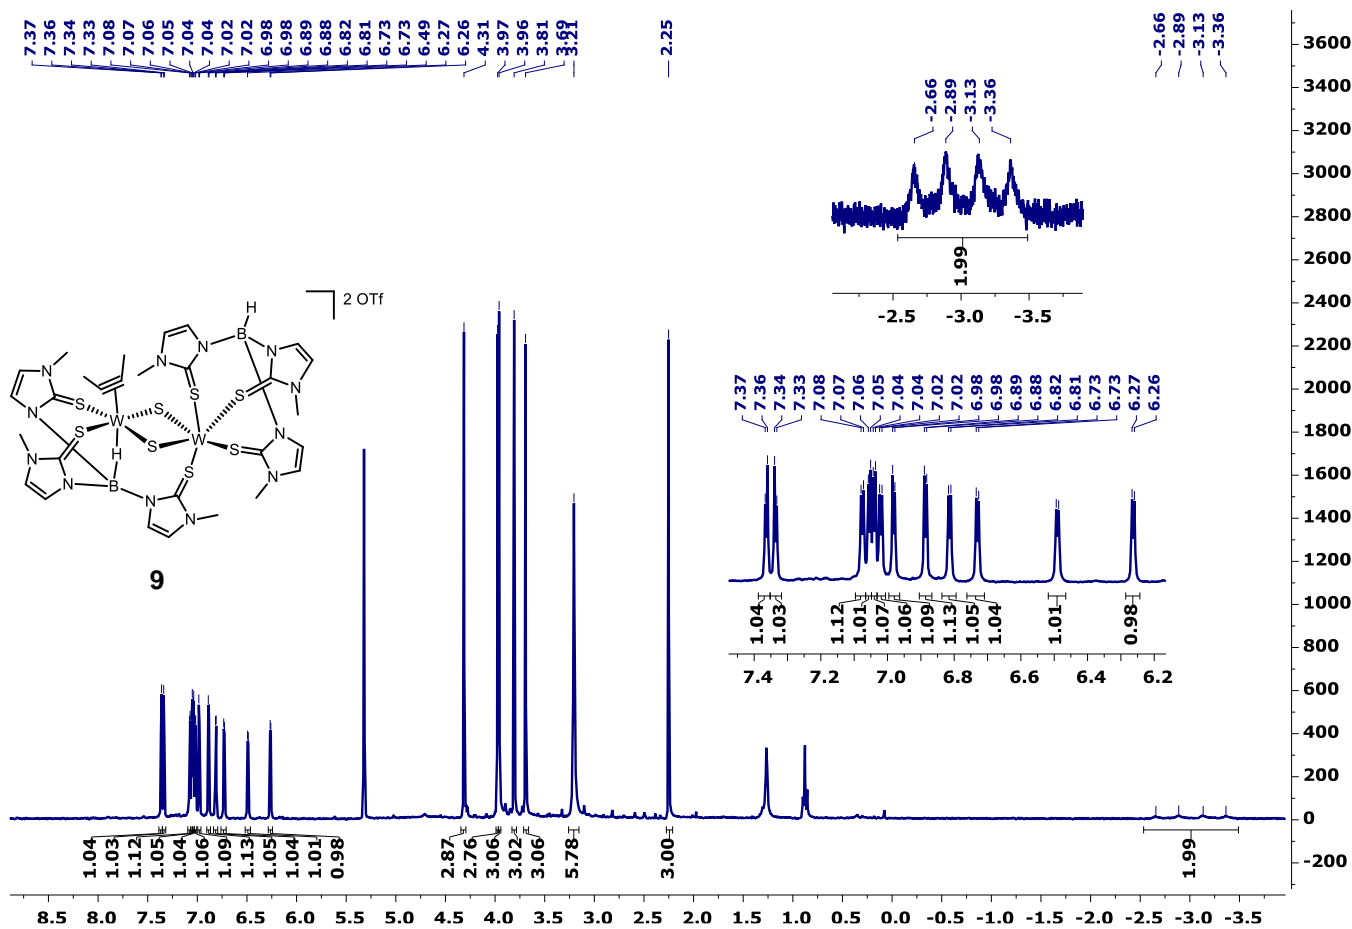

**Figure S22:**  $^1\text{H}$  NMR spectrum of  $[\text{W}_2(\mu\text{-S})_2(\text{C}_2\text{Me}_2)_2(\text{Tm}^{\text{Me}})_2](\text{OTf})_2$  (**9**) in  $\text{CD}_2\text{Cl}_2$ .

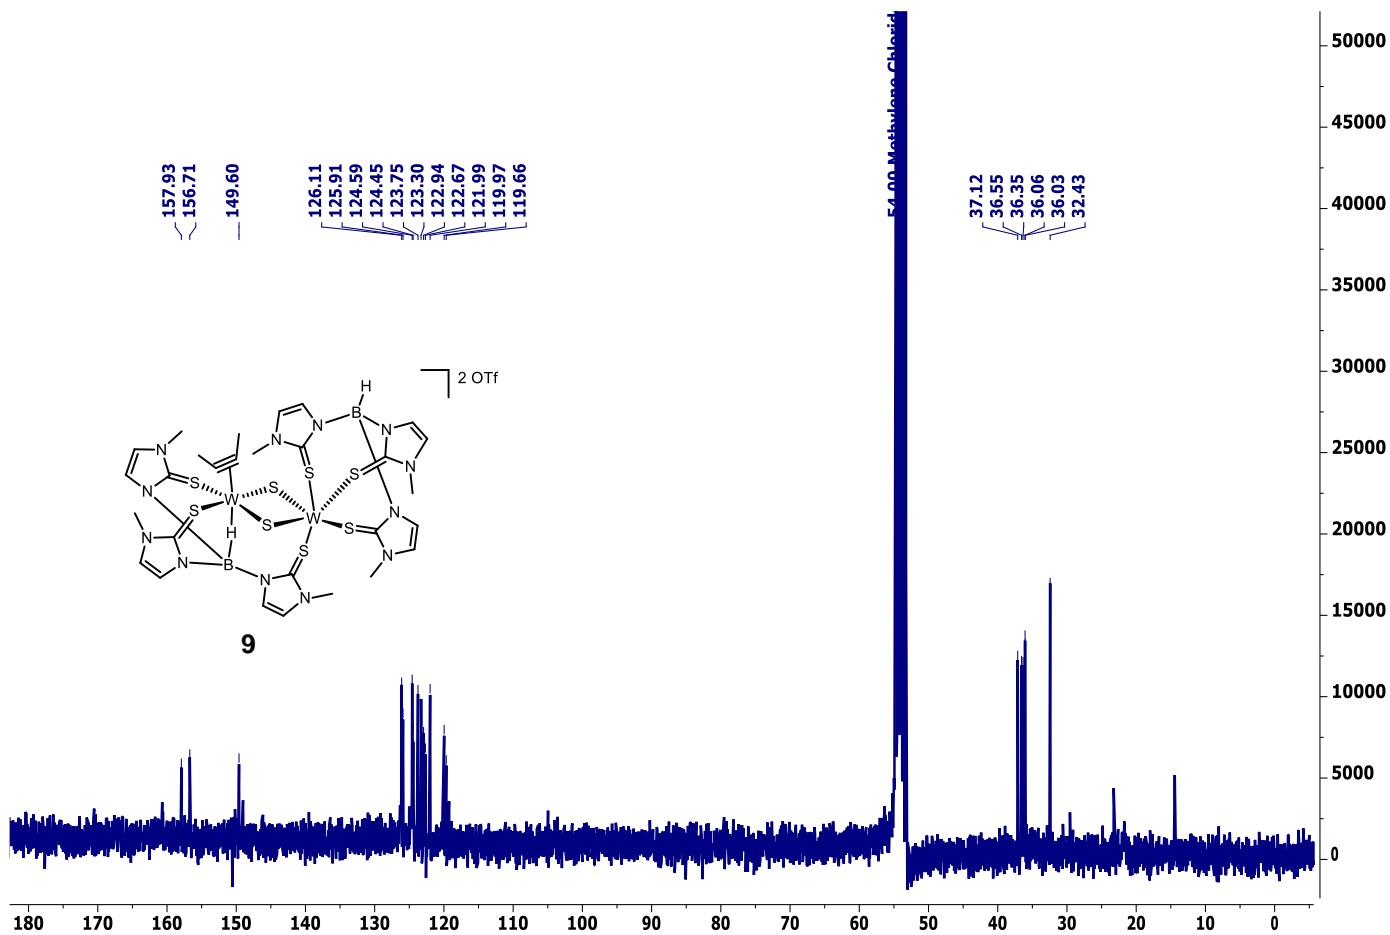

Figure S23:  $^{13}\text{C}$  NMR spectrum of  $[\text{W}_2(\mu\text{-S})_2(\text{C}_2\text{Me}_2)(\text{Tm}^{\text{Me}})_2](\text{OTf})_2$  (**9**) in  $\text{CD}_2\text{Cl}_2$ .

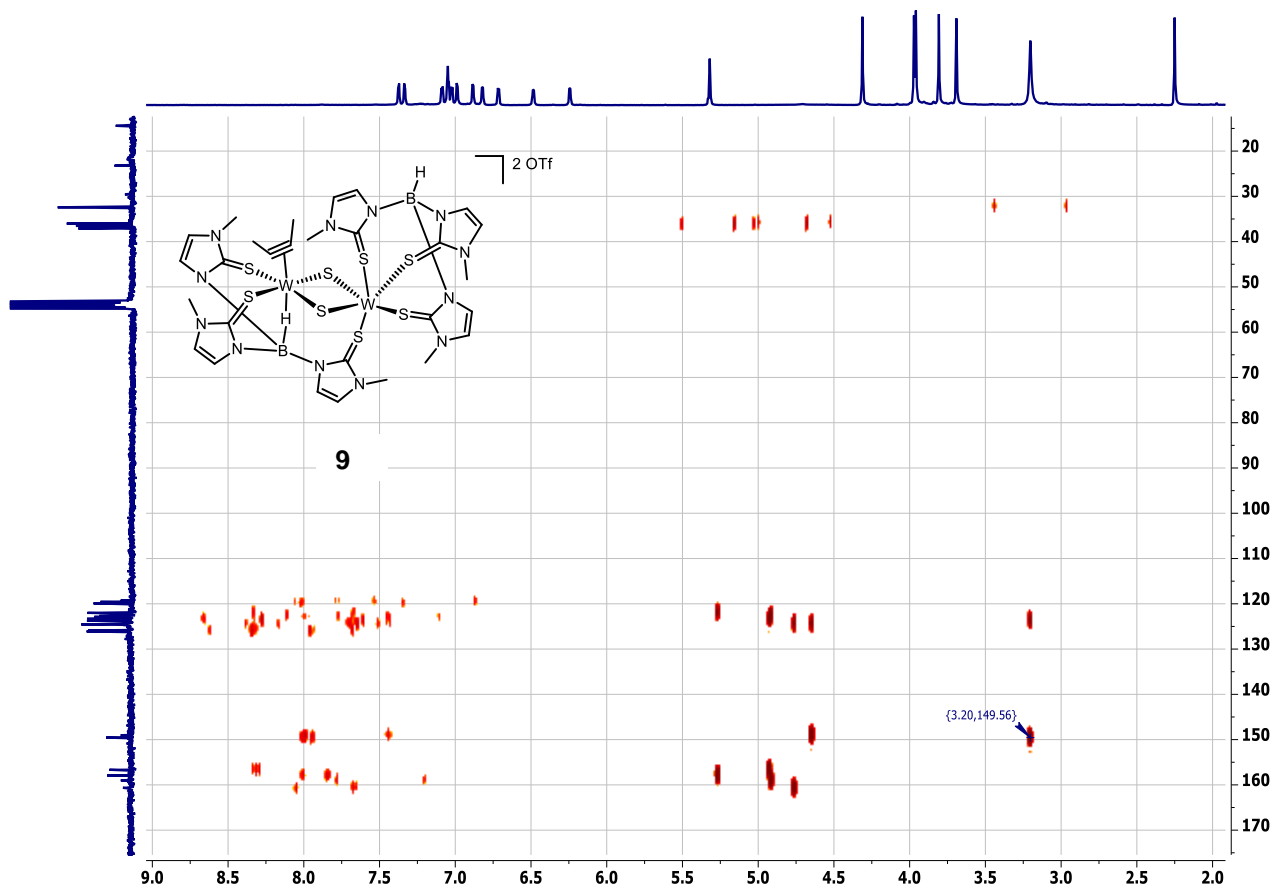

Figure S24: HMBC NMR spectrum of  $[\text{W}_2(\mu\text{-S})_2(\text{C}_2\text{Me}_2)(\text{Tm}^{\text{Me}})_2](\text{OTf})_2$  (**9**) in  $\text{CD}_2\text{Cl}_2$ .

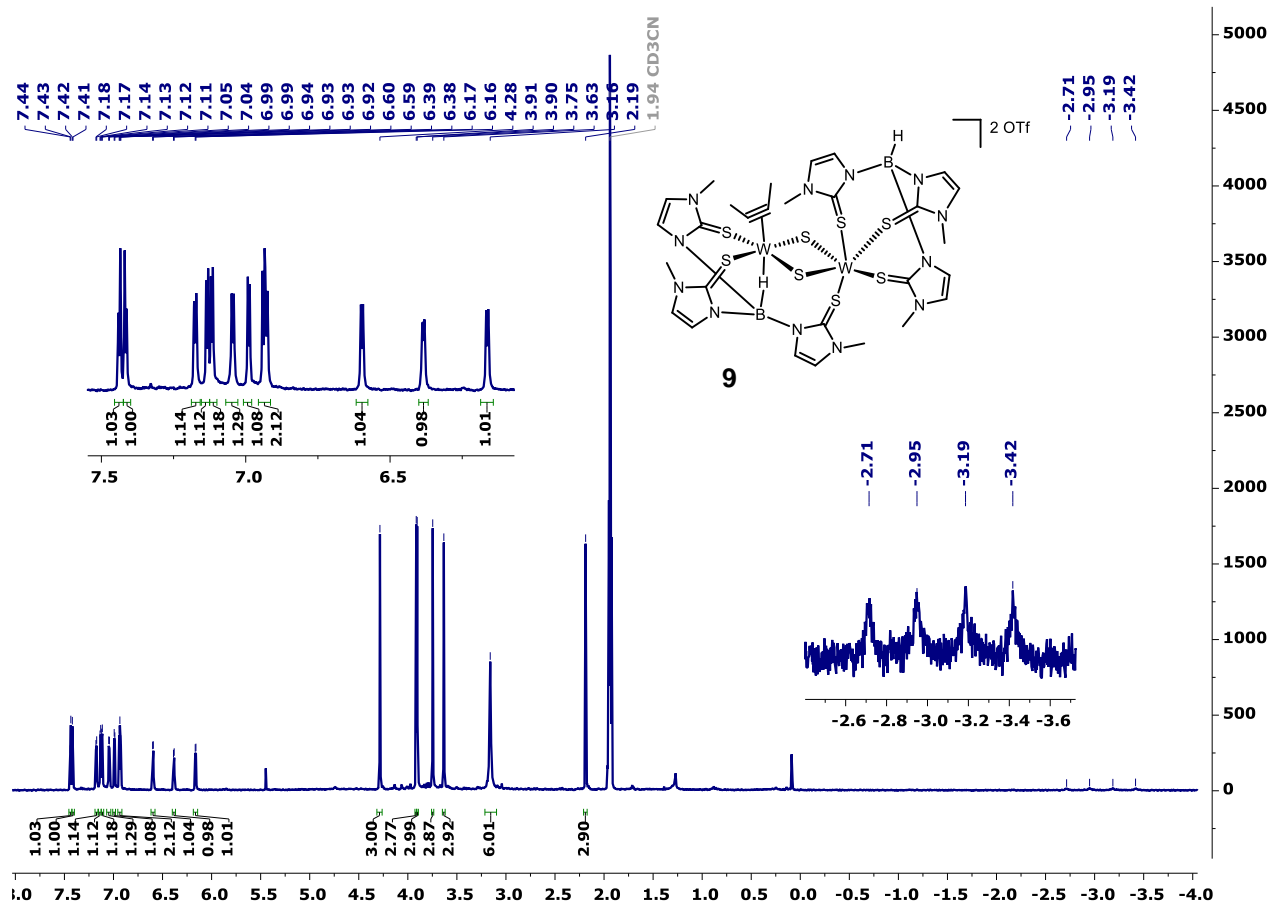

Figure S25:  $^1\text{H}$  NMR spectrum of  $[\text{W}_2(\mu\text{-S})_2(\text{C}_2\text{Me}_2)(\text{Tm}^{\text{Me}})_2](\text{OTf})_2$  (**9**) in  $\text{CD}_3\text{CN}$ .

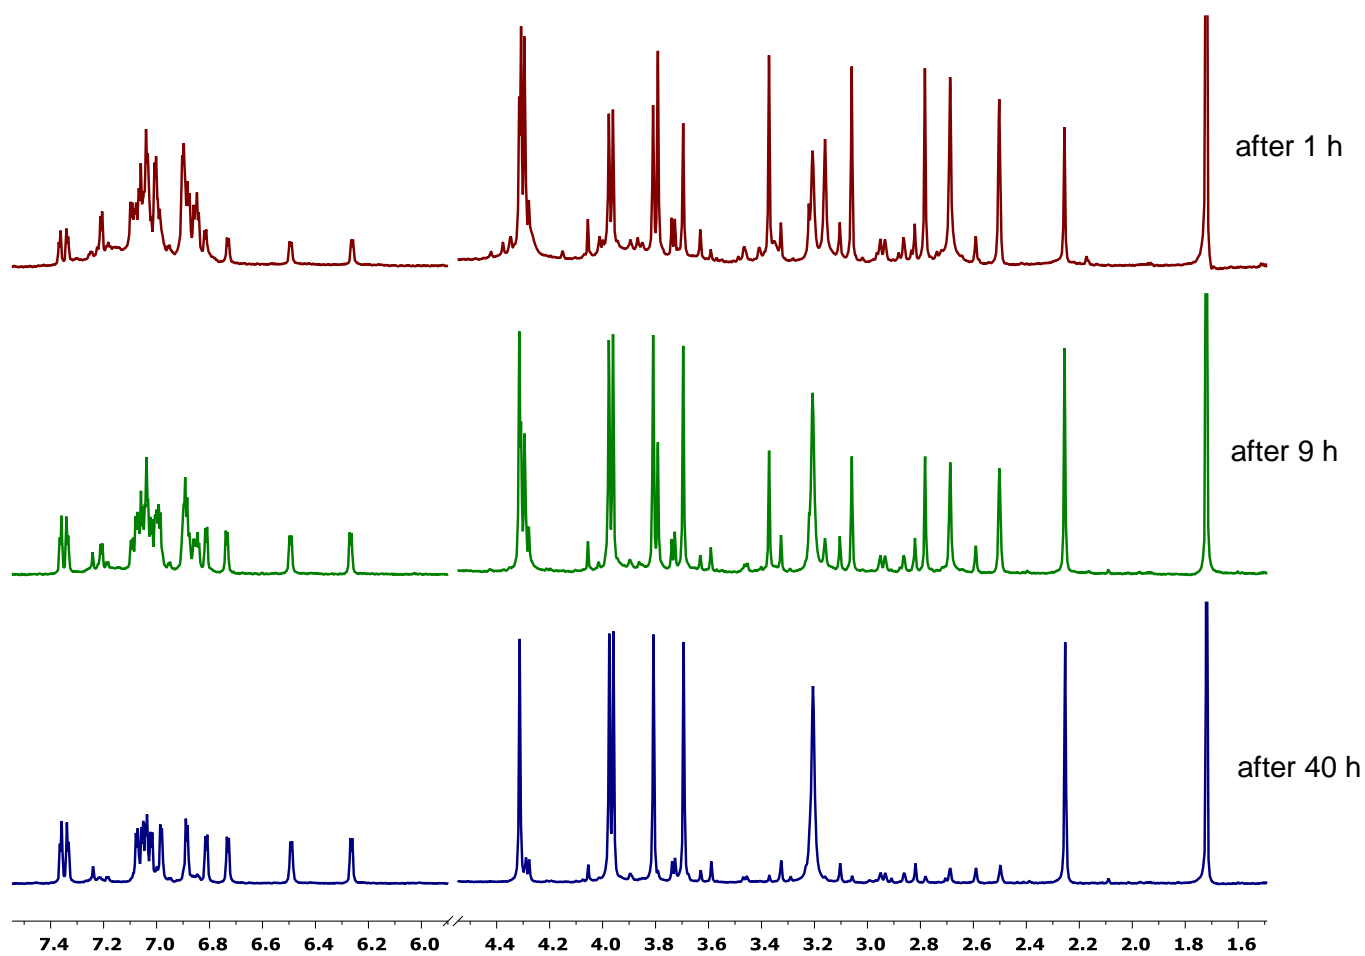

Figure S26:  $^1\text{H}$  NMR spectra of the formation of  $[\text{W}_2(\mu\text{-S})_2(\text{C}_2\text{Me}_2)(\text{Tm}^{\text{Me}})_2](\text{OTf})_2$  (**9**) in  $\text{CD}_2\text{Cl}_2$  over 40h.

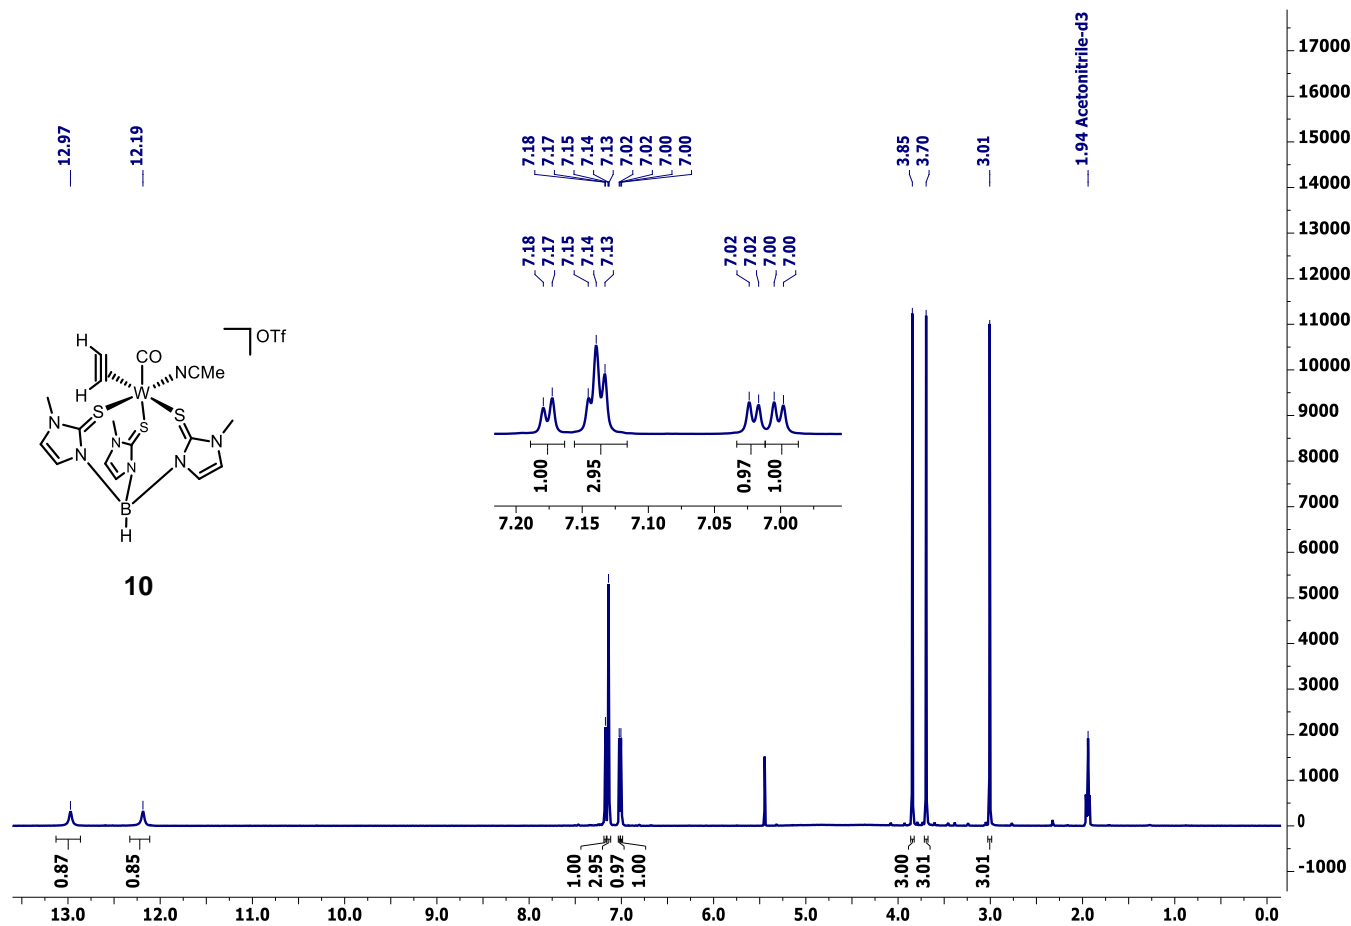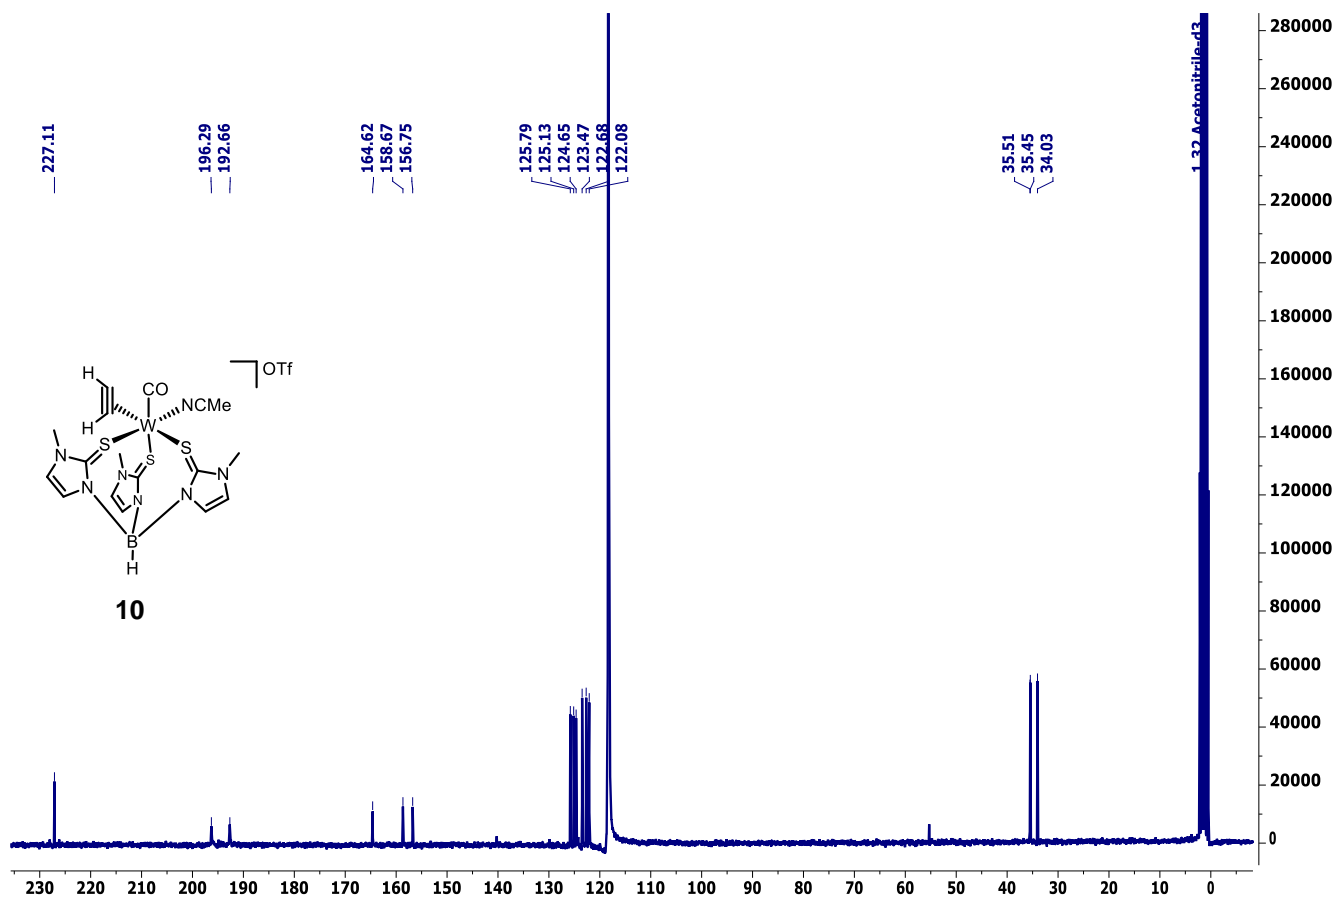

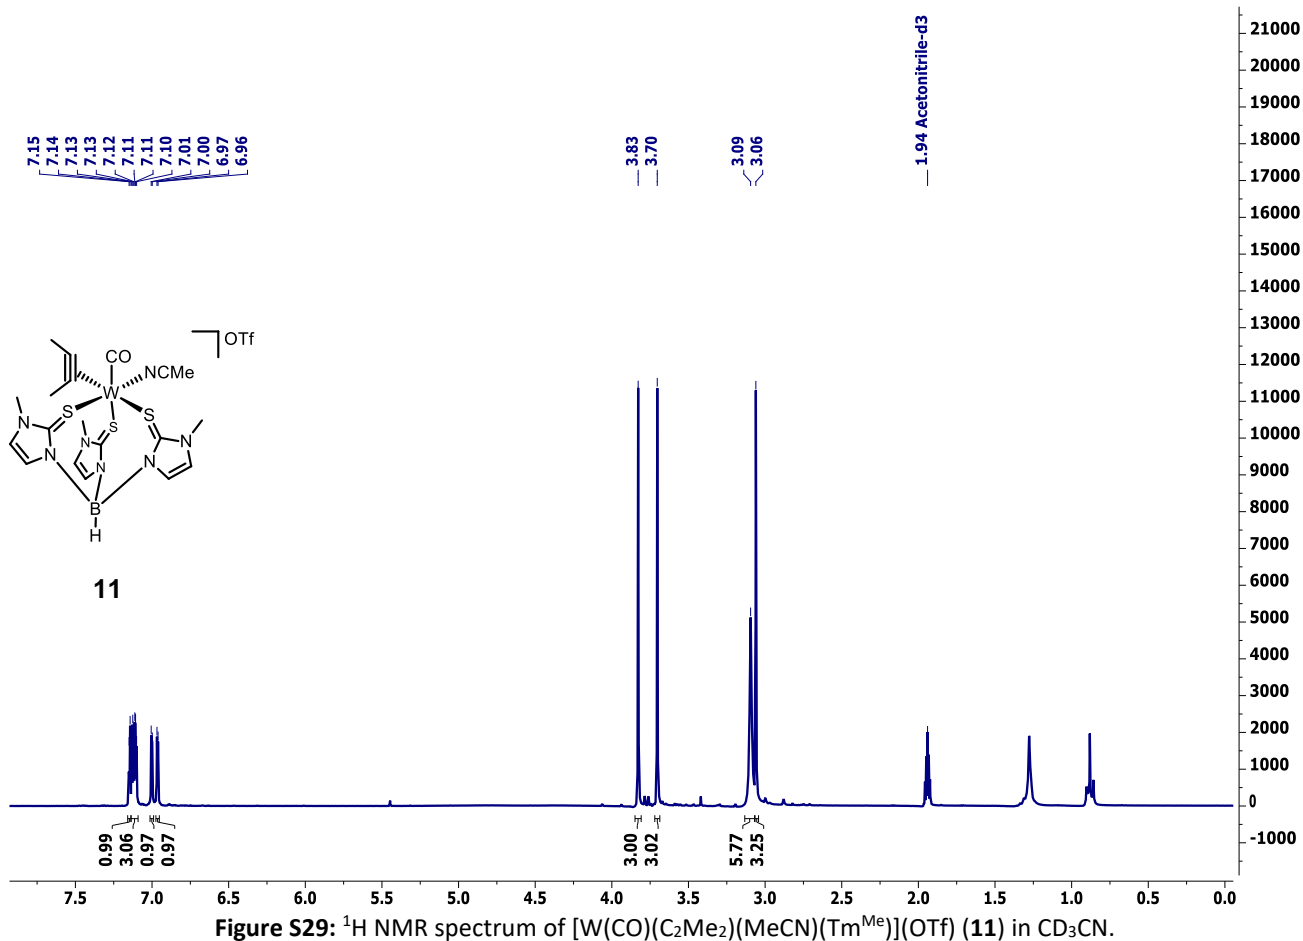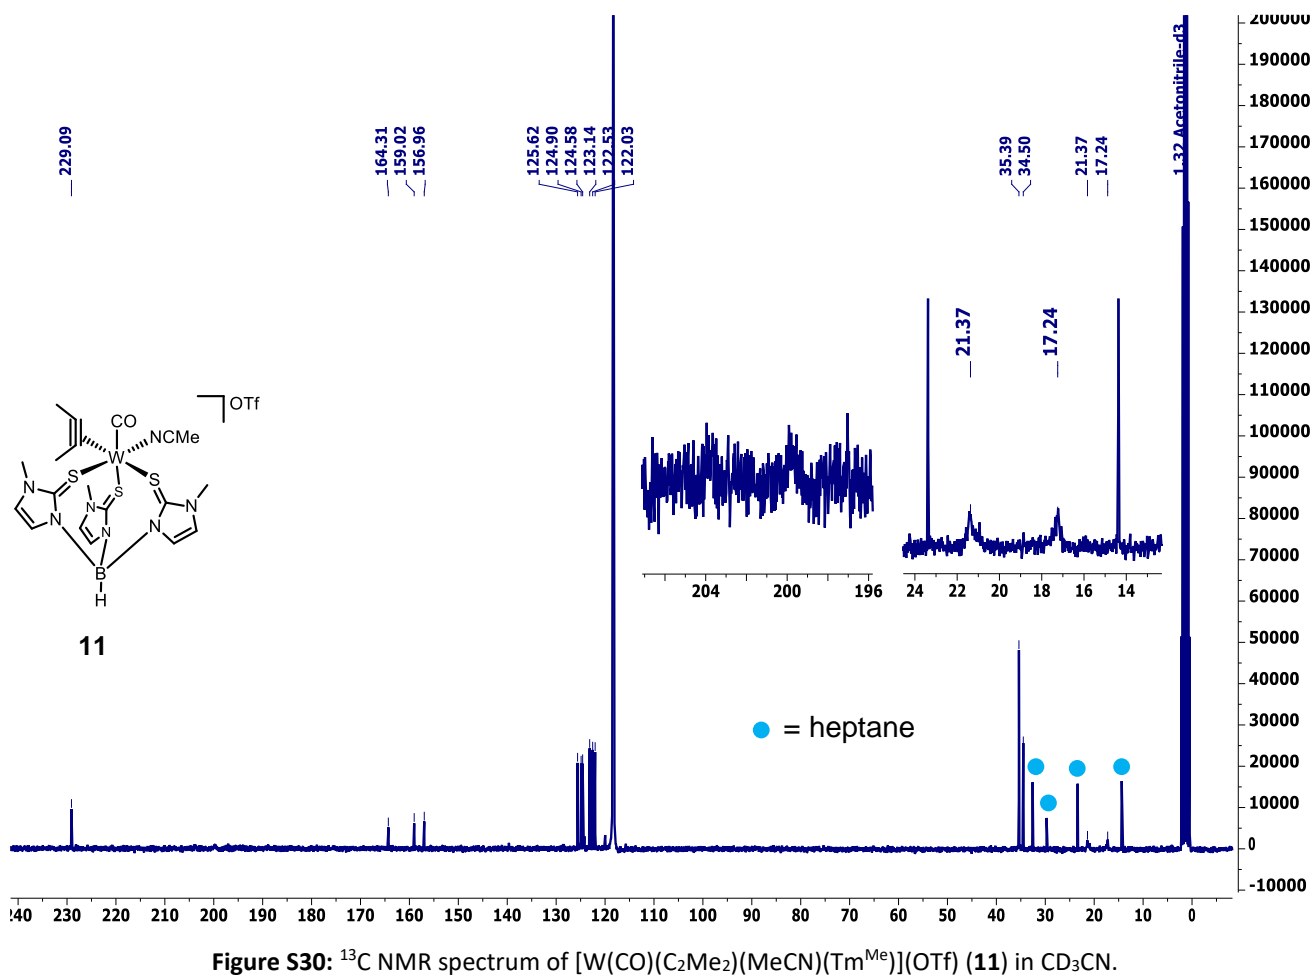

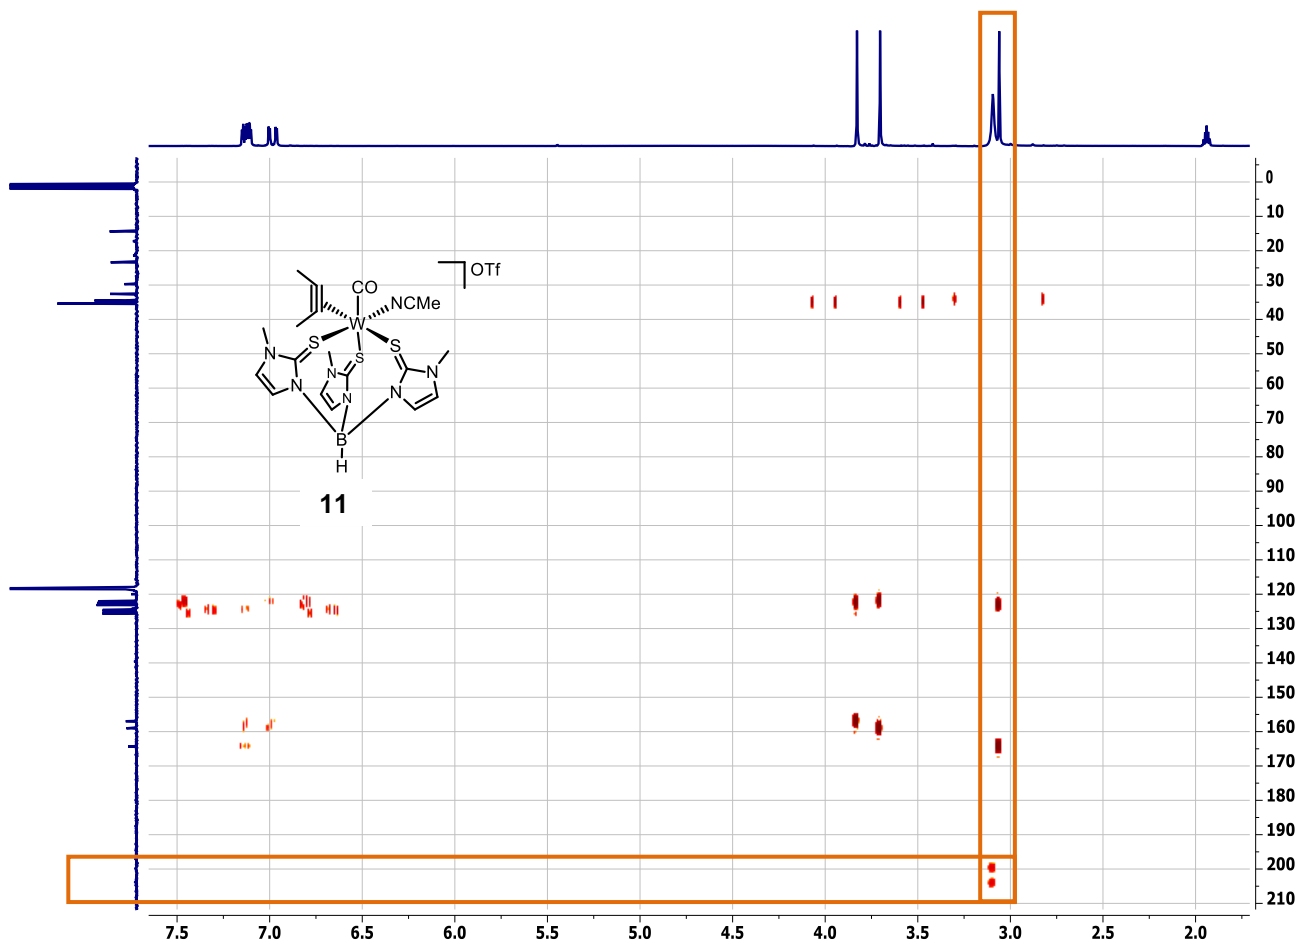

Figure S31: HMBC NMR spectrum of  $[W(CO)(C_2Me_2)(MeCN)(Tm^{Me})](OTf)$  (**11**) in  $CD_3CN$ .

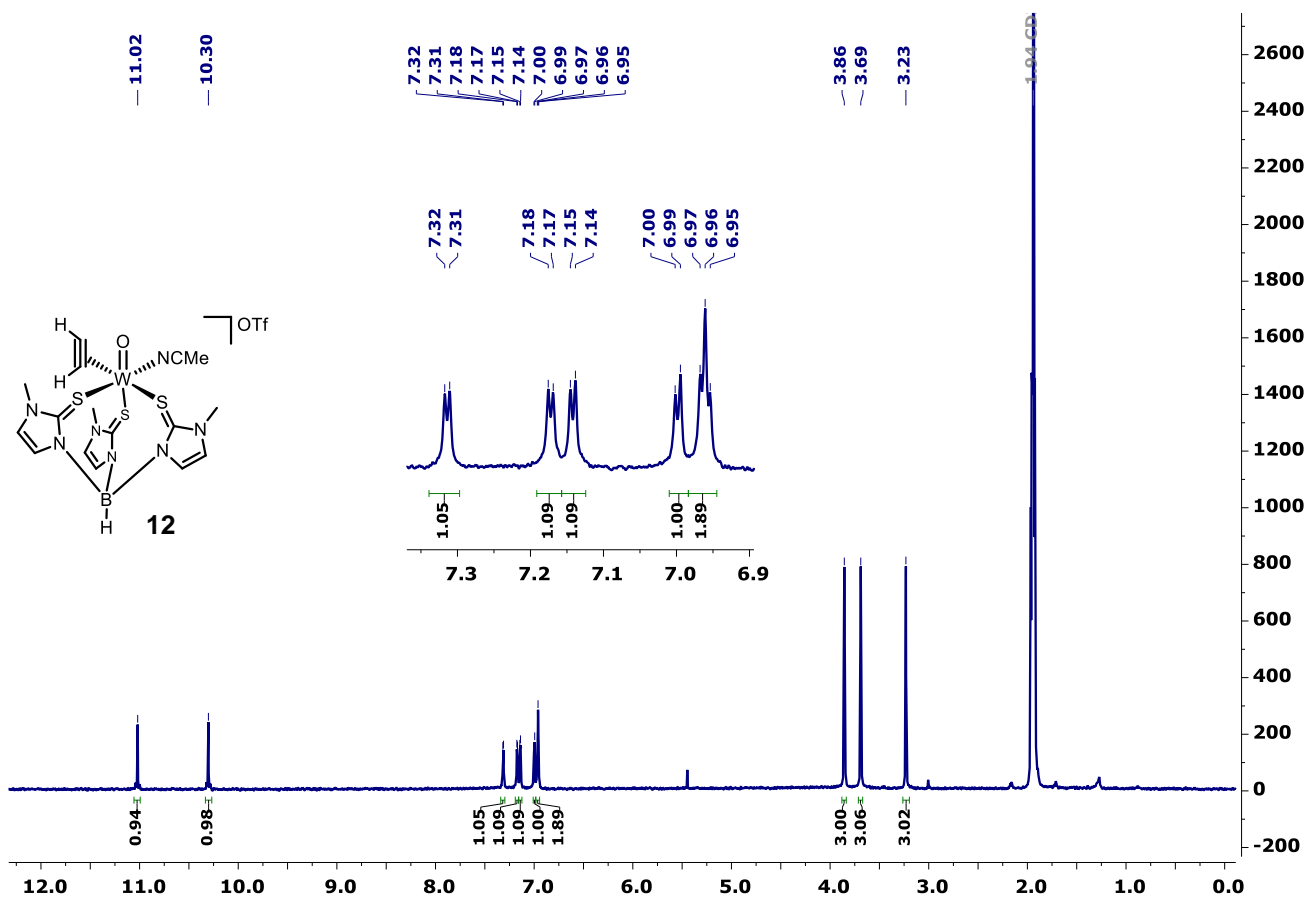

Figure S32:  $^1H$  NMR spectrum of  $[WO(C_2H_2)(MeCN)(Tm^{Me})](OTf)$  (**12**)  $\cdot$  PyHBr with 2 equiv of TlOTf in  $CD_3CN$ .

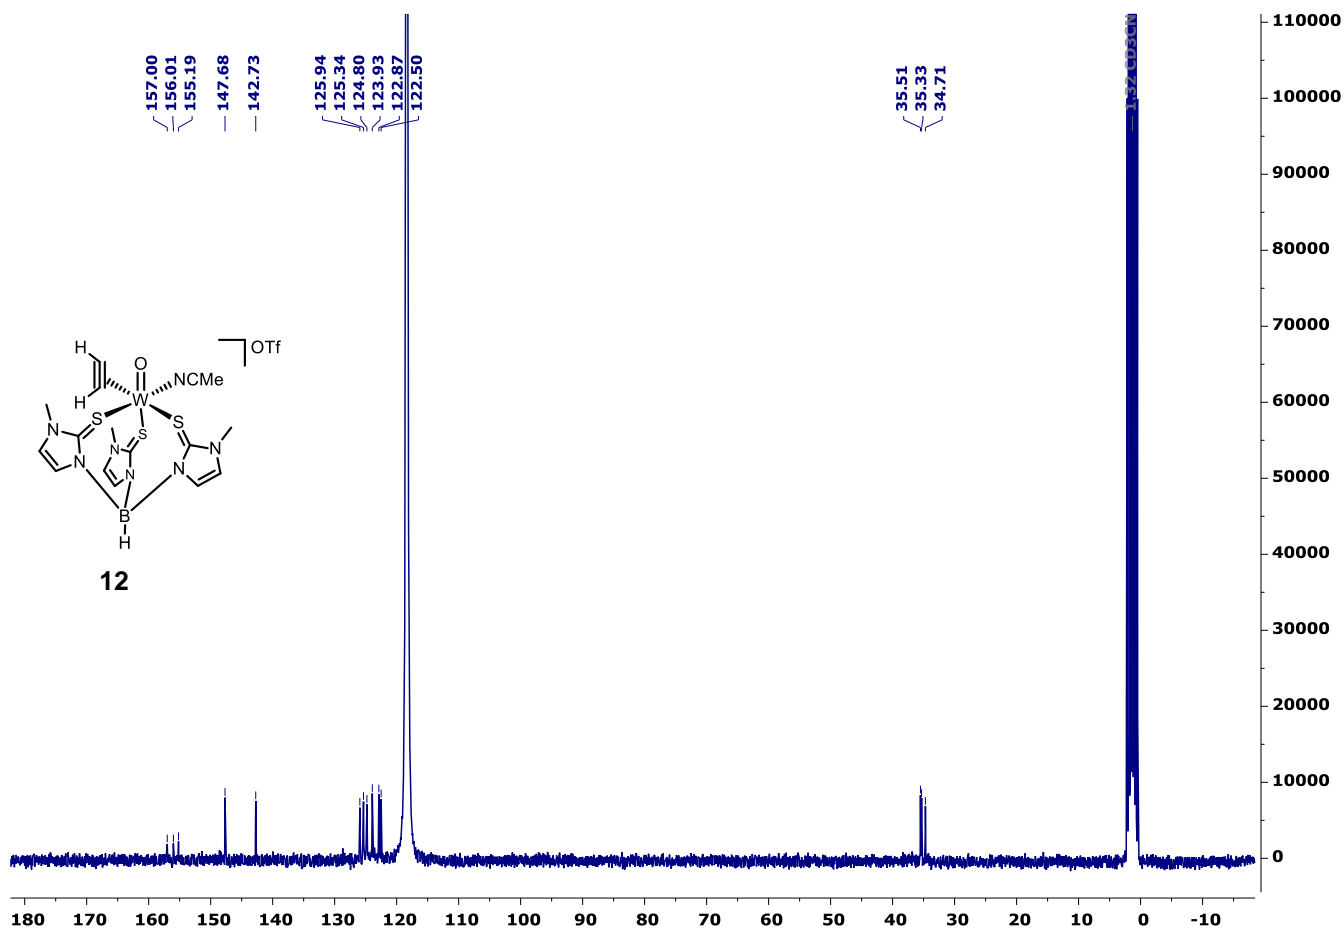

Figure S33: <sup>13</sup>C NMR spectrum of [WO(C<sub>2</sub>H<sub>2</sub>)(MeCN)(Tm<sup>Me</sup>)](OTf) (**12**) in CD<sub>3</sub>CN.

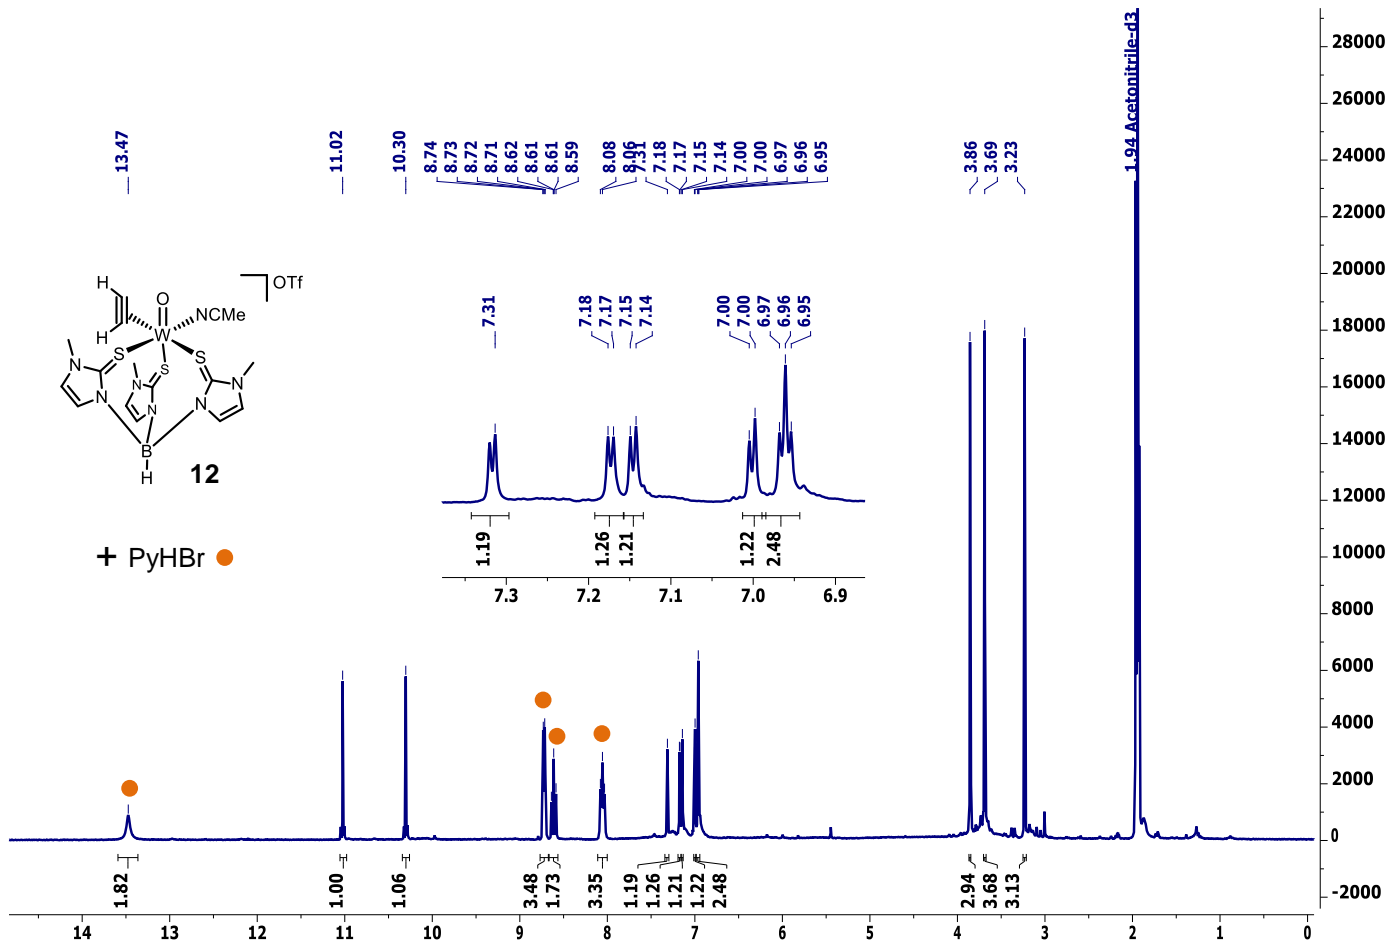

Figure S34: <sup>1</sup>H NMR spectrum of [WO(C<sub>2</sub>H<sub>2</sub>)(MeCN)(Tm<sup>Me</sup>)](OTf) (**12**) · PyHBr with 2 equiv of TlOTf in CD<sub>3</sub>CN.



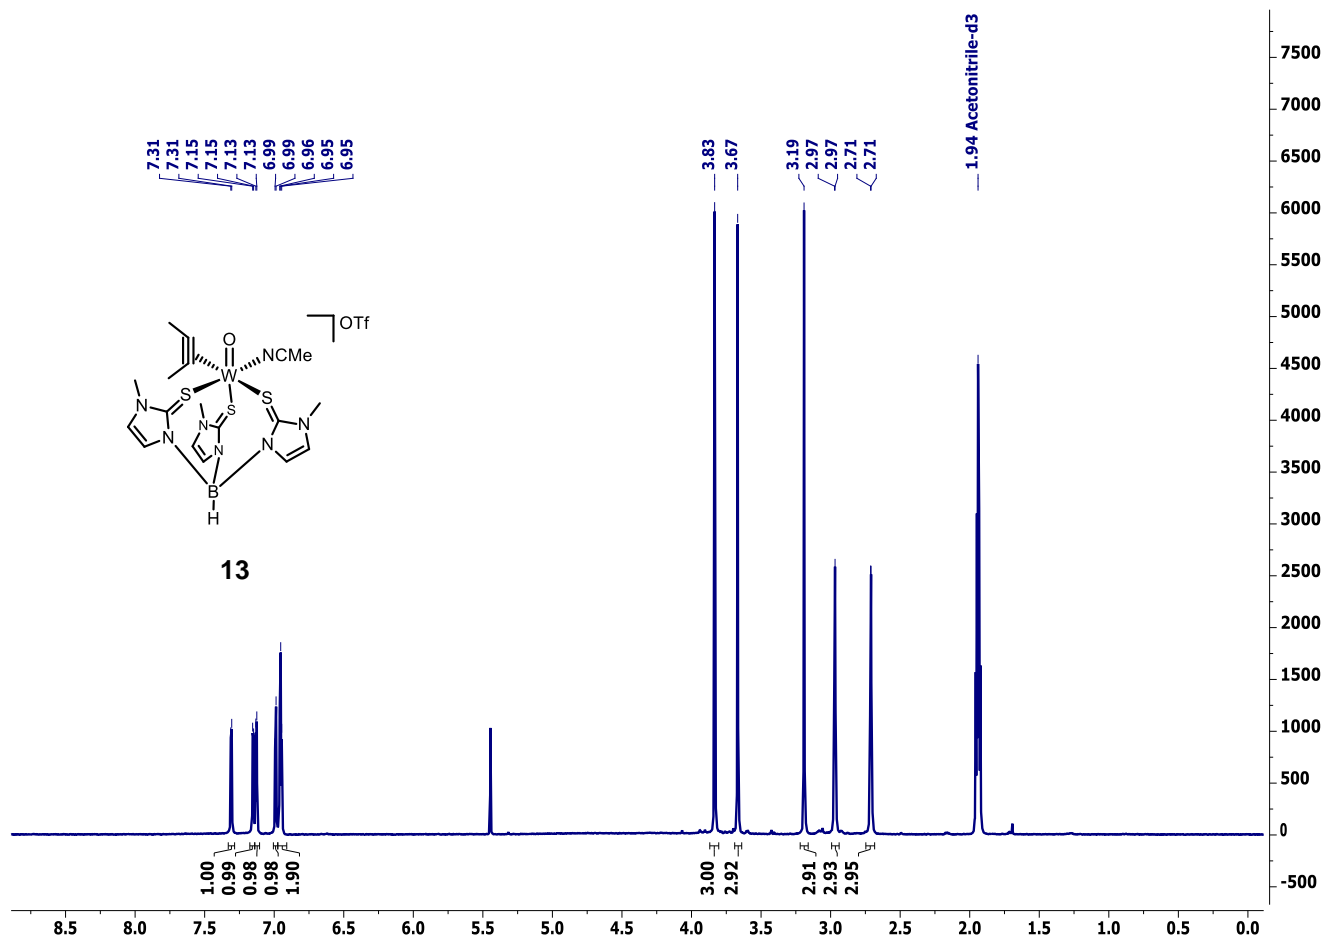

Figure S35:  $^1\text{H}$  NMR spectrum of  $[\text{WO}(\text{C}_2\text{Me}_2)(\text{MeCN})(\text{Tm}^{\text{Me}})](\text{OTf})$  (**13**) in  $\text{CD}_3\text{CN}$ .

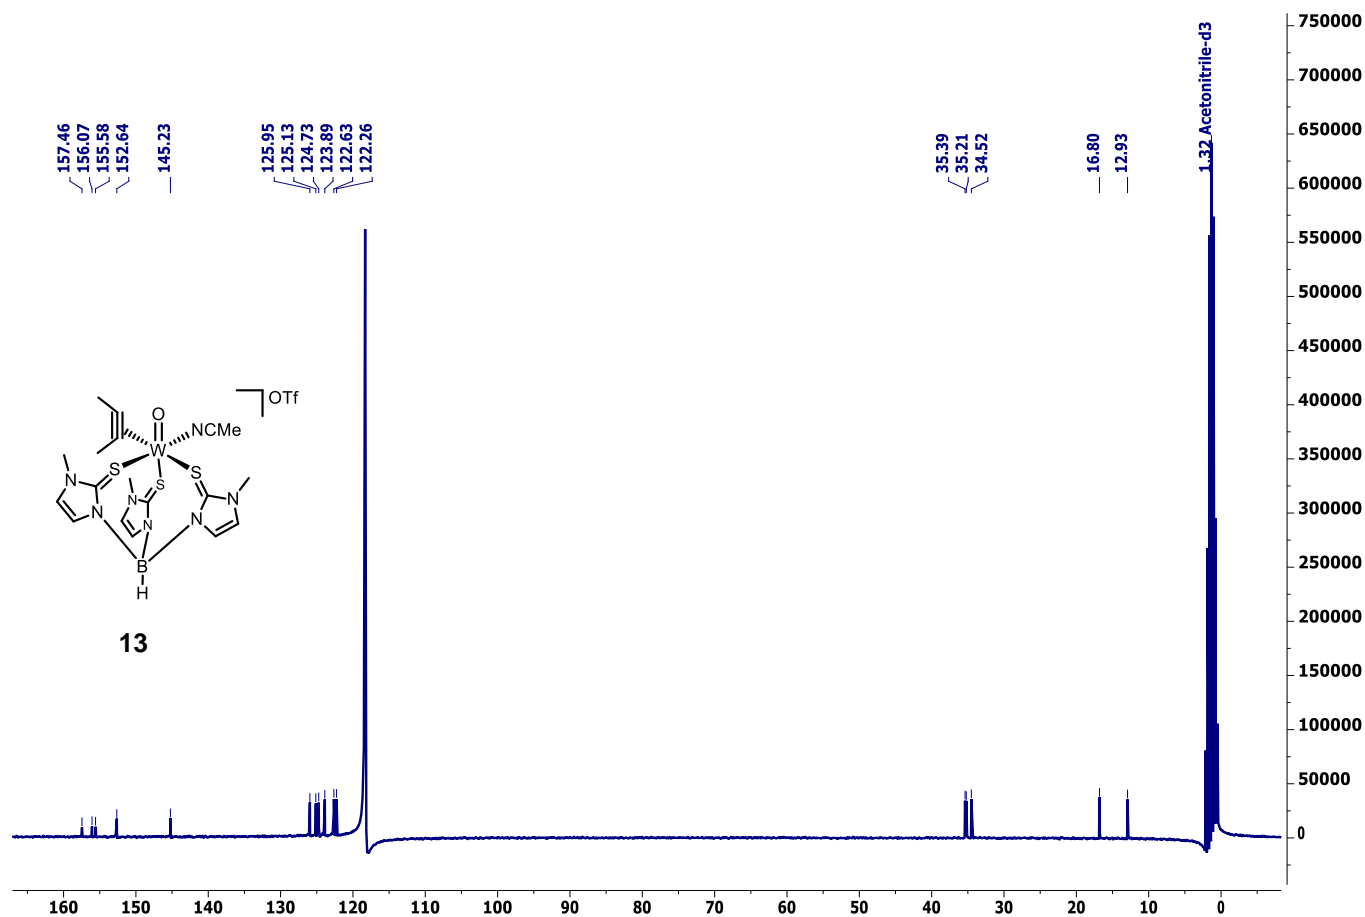

Figure S36:  $^{13}\text{C}$  NMR spectrum of  $[\text{WO}(\text{C}_2\text{Me}_2)(\text{MeCN})(\text{Tm}^{\text{Me}})](\text{OTf})$  (**13**) in  $\text{CD}_3\text{CN}$ .

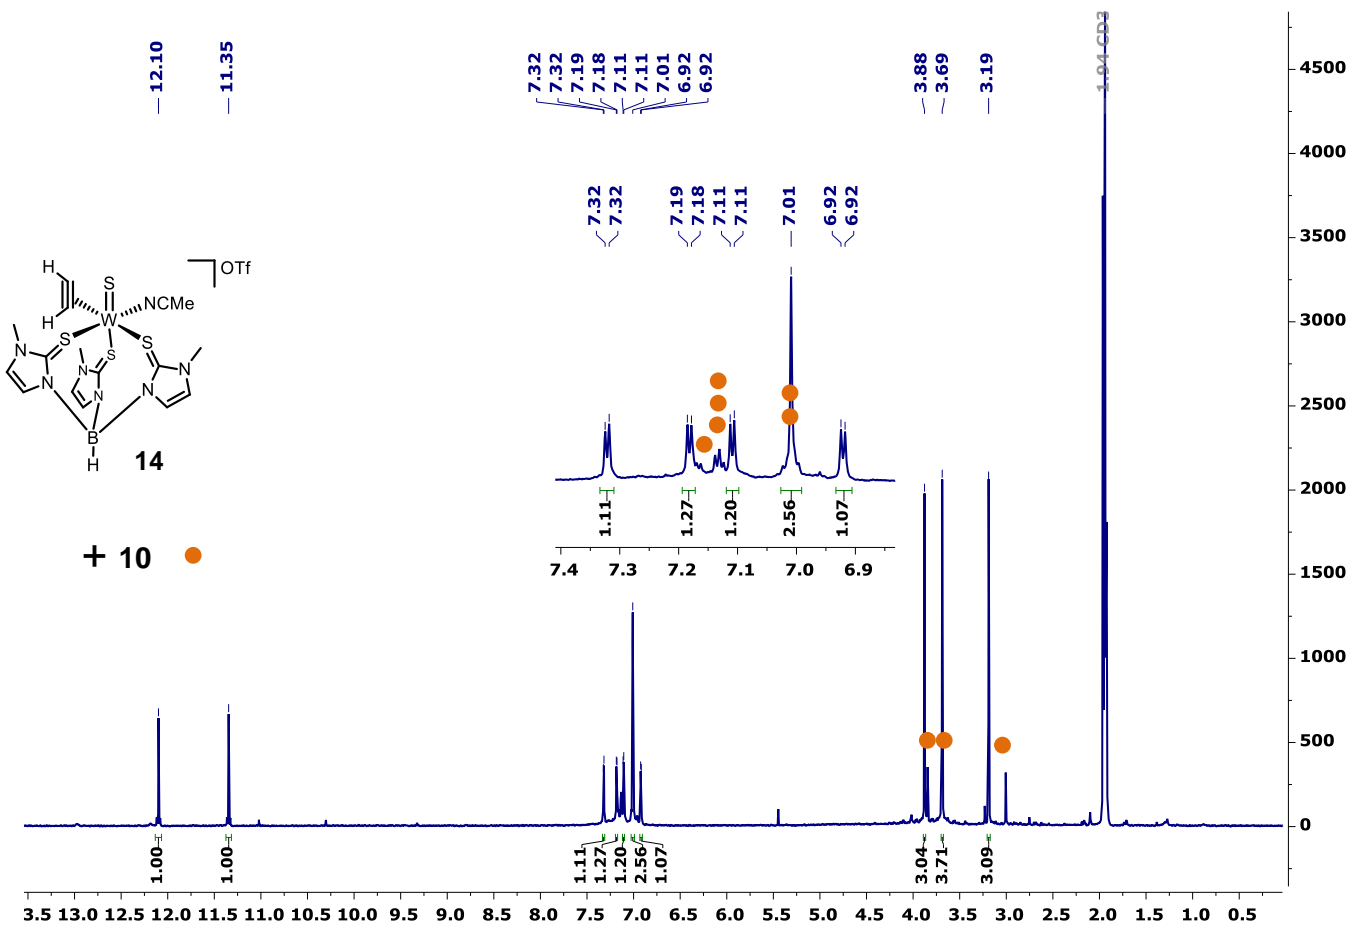

Figure S37:  $^1\text{H}$  NMR spectrum of  $[\text{WS}(\text{C}_2\text{H}_2)(\text{MeCN})(\text{Tm}^{\text{Me}})](\text{OTf})$  (**14**) in  $\text{CD}_3\text{CN}$ .

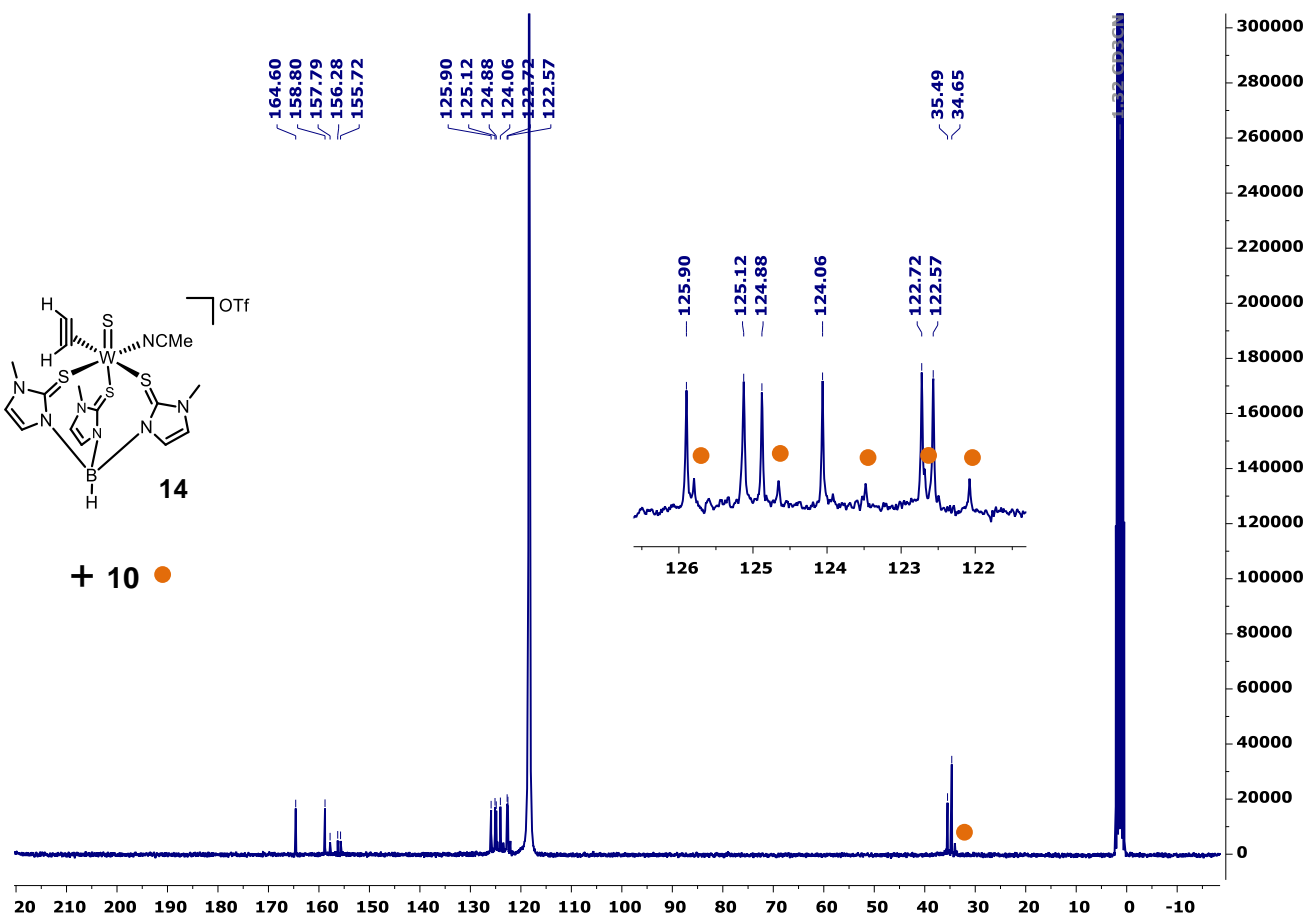

Figure S38:  $^{13}\text{C}$  NMR spectrum of  $[\text{WS}(\text{C}_2\text{H}_2)(\text{MeCN})(\text{Tm}^{\text{Me}})](\text{OTf})$  (**14**) in  $\text{CD}_3\text{CN}$ .

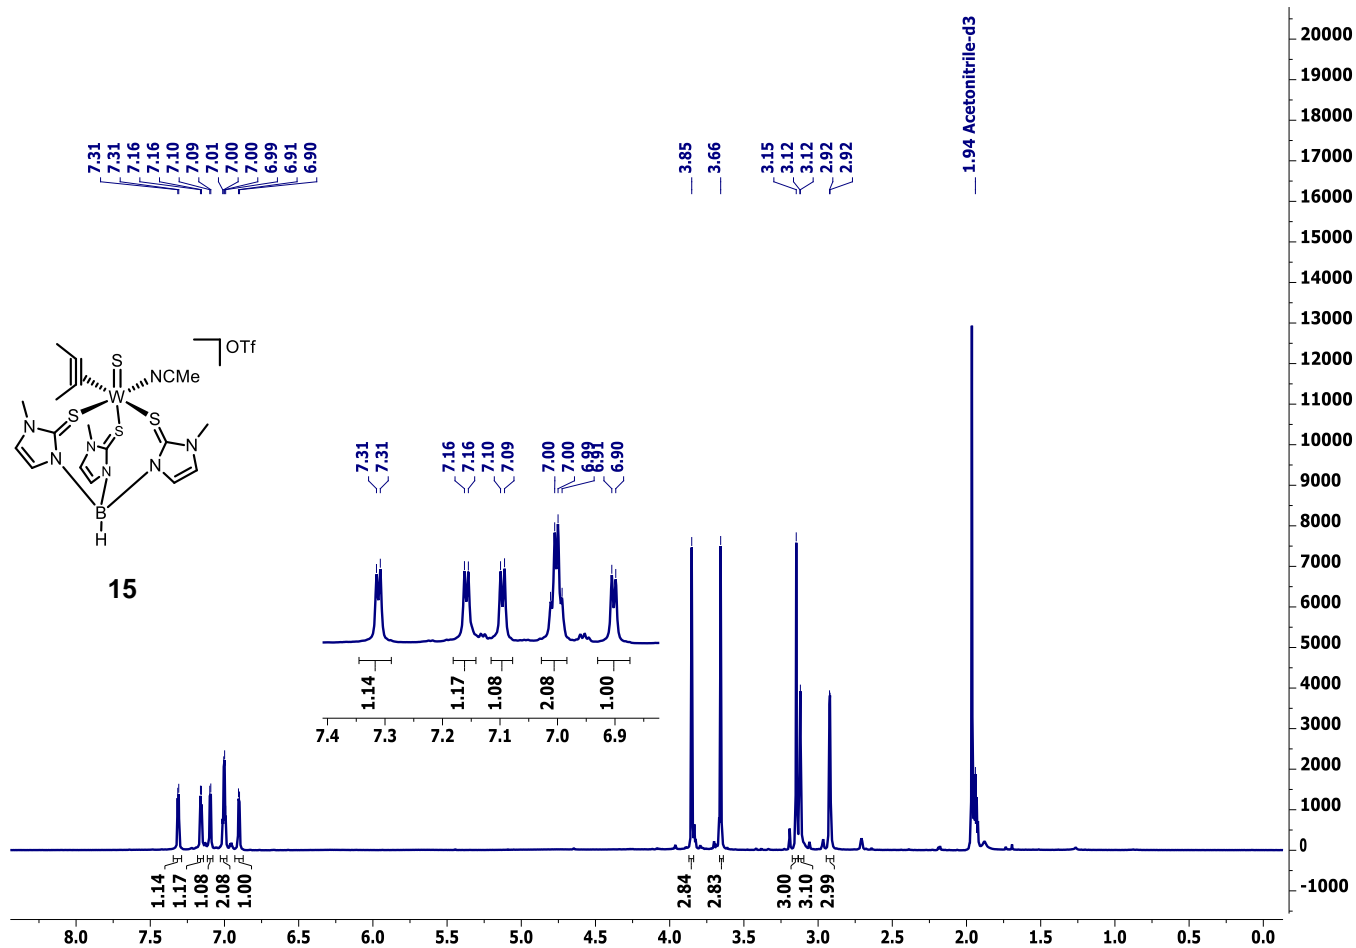

**Figure S39:**  $^1\text{H}$  NMR spectrum of  $[\text{WS}(\text{C}_2\text{Me}_2)(\text{MeCN})(\text{Tm}^{\text{Me}})](\text{OTf})$  (**15**) in  $\text{CD}_3\text{CN}$ .

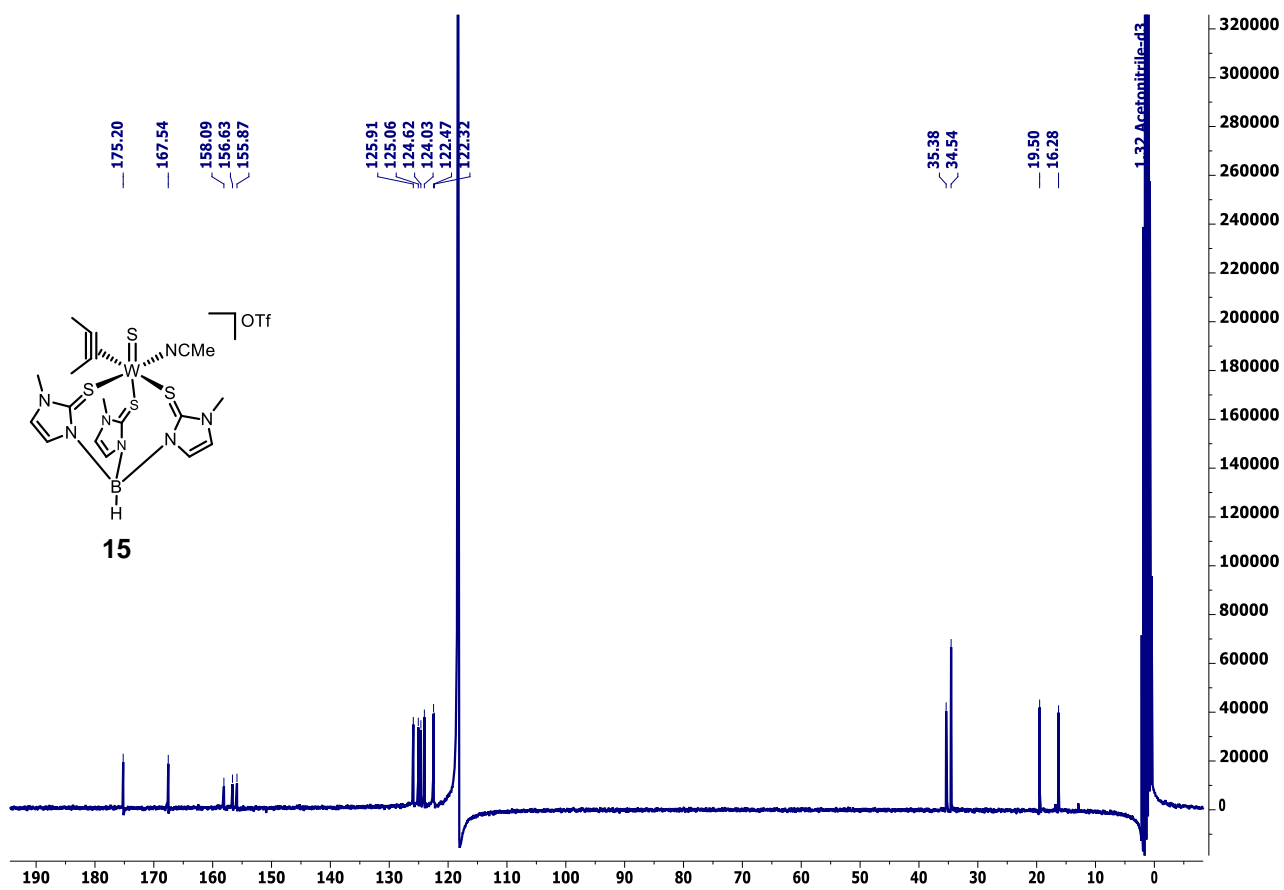

**Figure S40:**  $^{13}\text{C}$  NMR spectrum of  $[\text{WS}(\text{C}_2\text{Me}_2)(\text{MeCN})(\text{Tm}^{\text{Me}})](\text{OTf})$  (**15**) in  $\text{CD}_3\text{CN}$ .

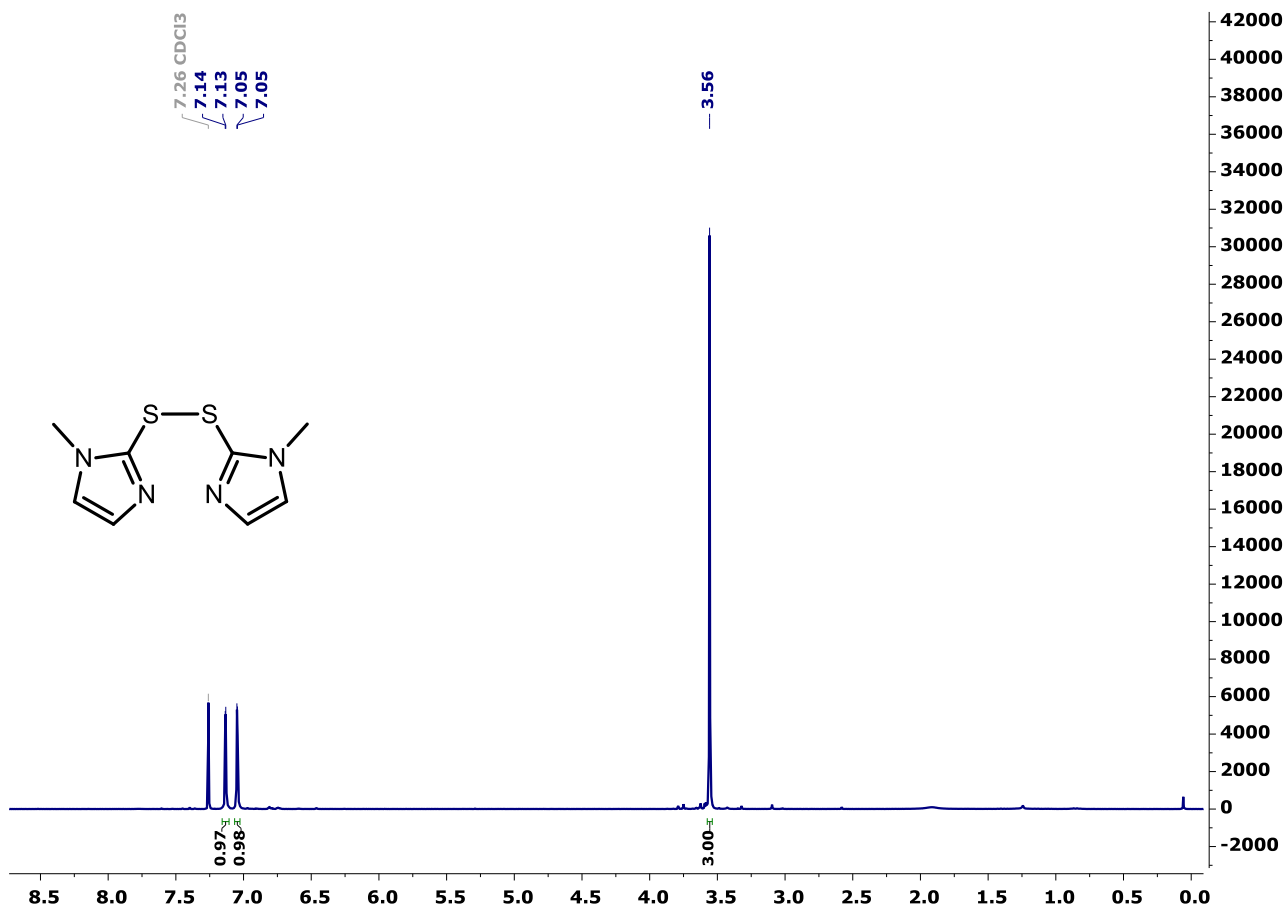

Figure S41: <sup>1</sup>H NMR spectrum of mt-S-S-mt in CDCl<sub>3</sub>.

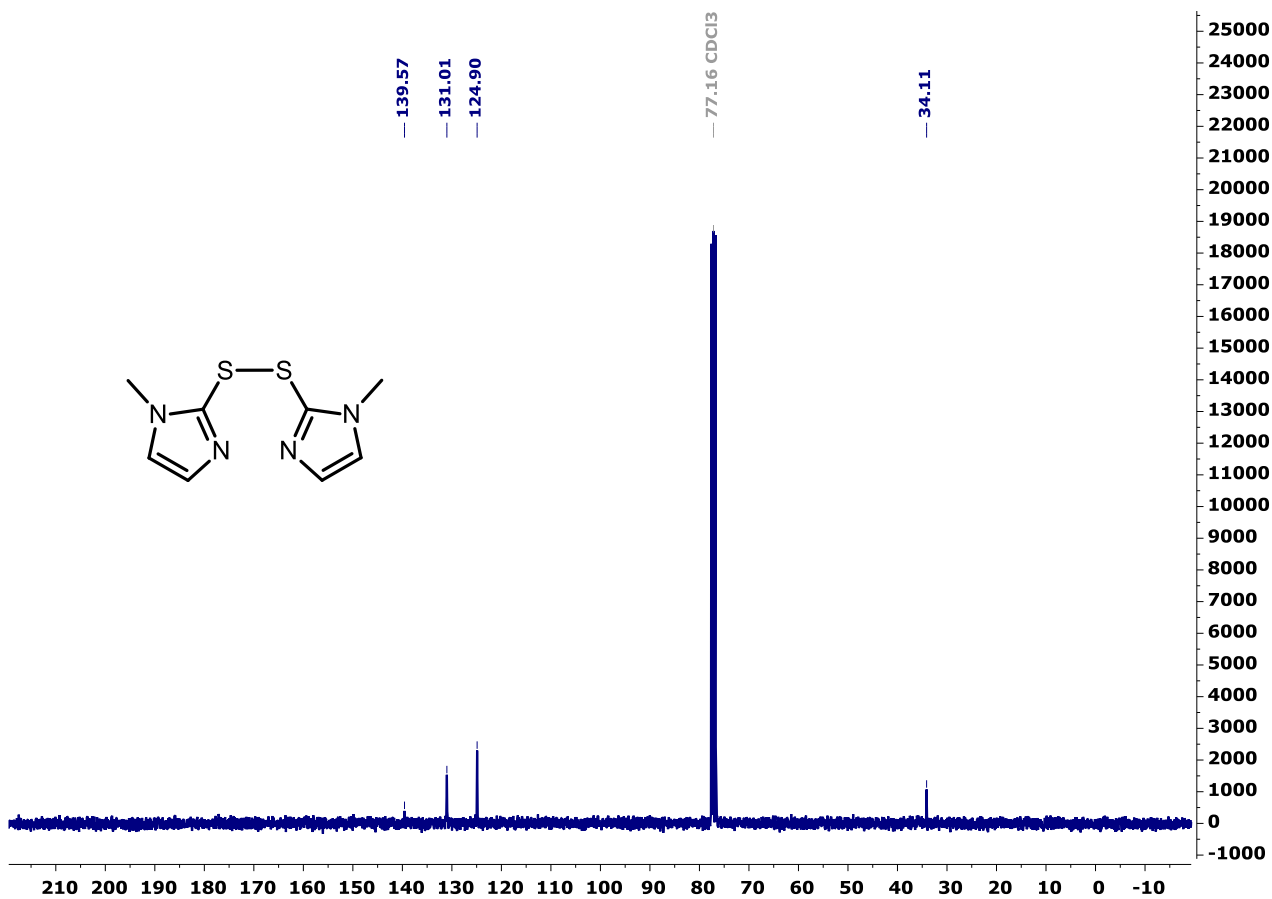

Figure S42: <sup>13</sup>C NMR spectrum of mt-S-S-mt in CDCl<sub>3</sub>.

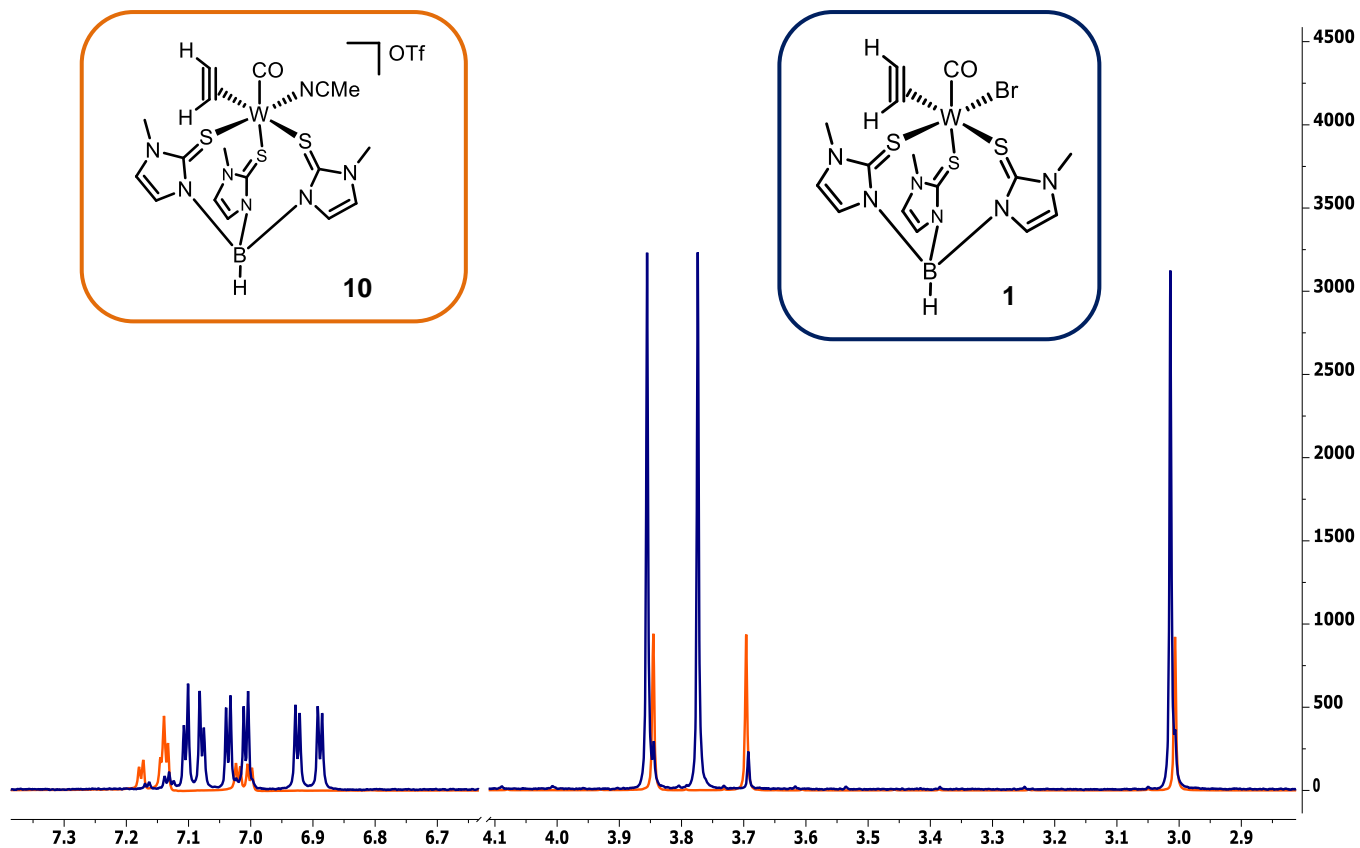

**Figure S43:** Superimposed spectra of  $[\text{W}(\text{CO})(\text{C}_2\text{H}_2)(\text{Tm}^{\text{Me}})\text{Br}]$  (**1**, blue) and  $[\text{W}(\text{CO})(\text{C}_2\text{H}_2)(\text{MeCN})(\text{Tm}^{\text{Me}})](\text{OTf})$  (**10**, orange) in  $\text{CD}_3\text{CN}$ .

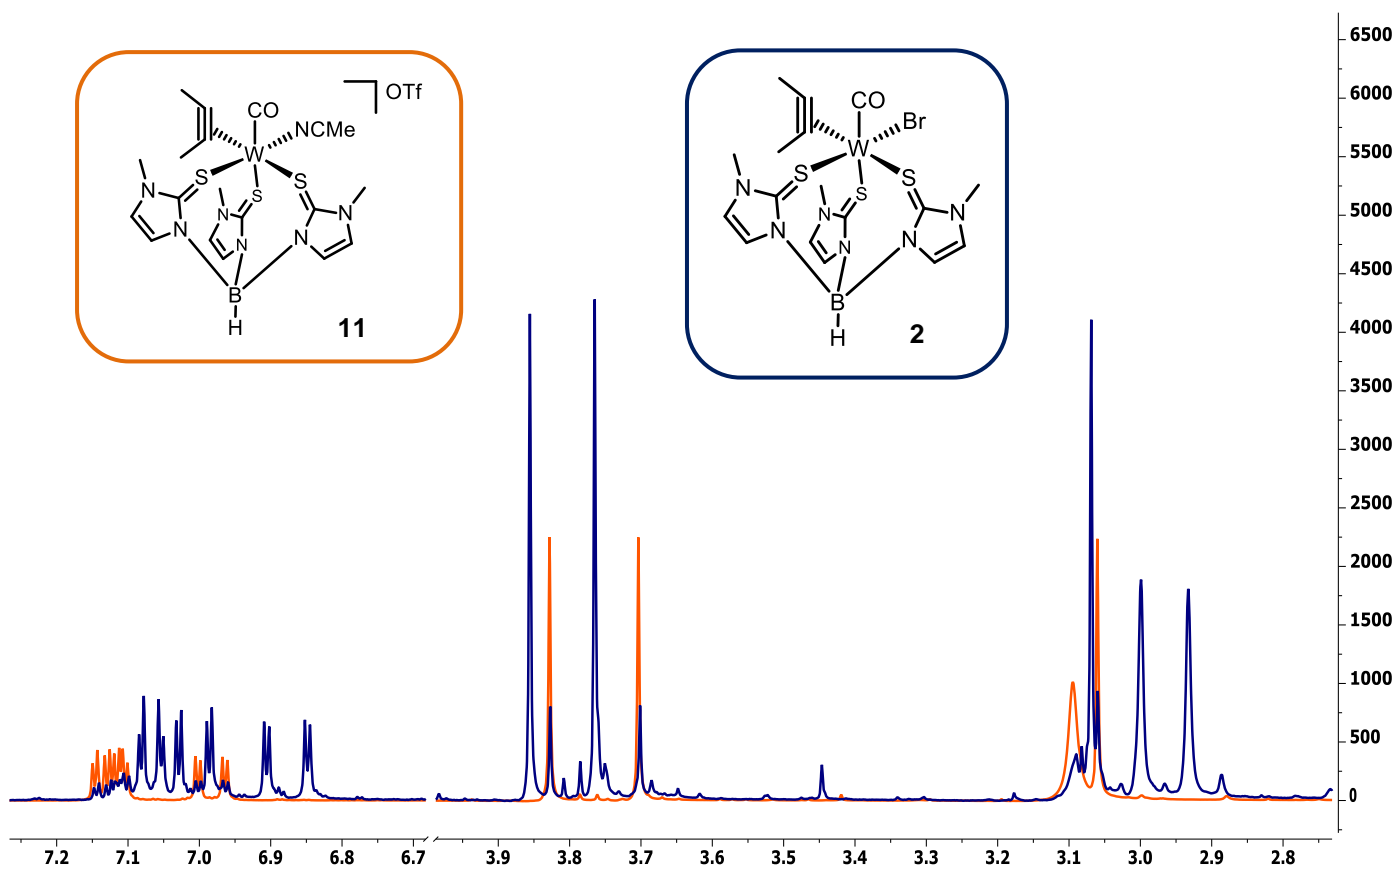

**Figure S44:** Superimposed spectra of  $[\text{W}(\text{CO})(\text{C}_2\text{Me}_2)(\text{Tm}^{\text{Me}})\text{Br}]$  (**2**, blue) and  $[\text{W}(\text{CO})(\text{C}_2\text{Me}_2)(\text{MeCN})(\text{Tm}^{\text{Me}})](\text{OTf})$  (**11**, orange) in  $\text{CD}_3\text{CN}$ .

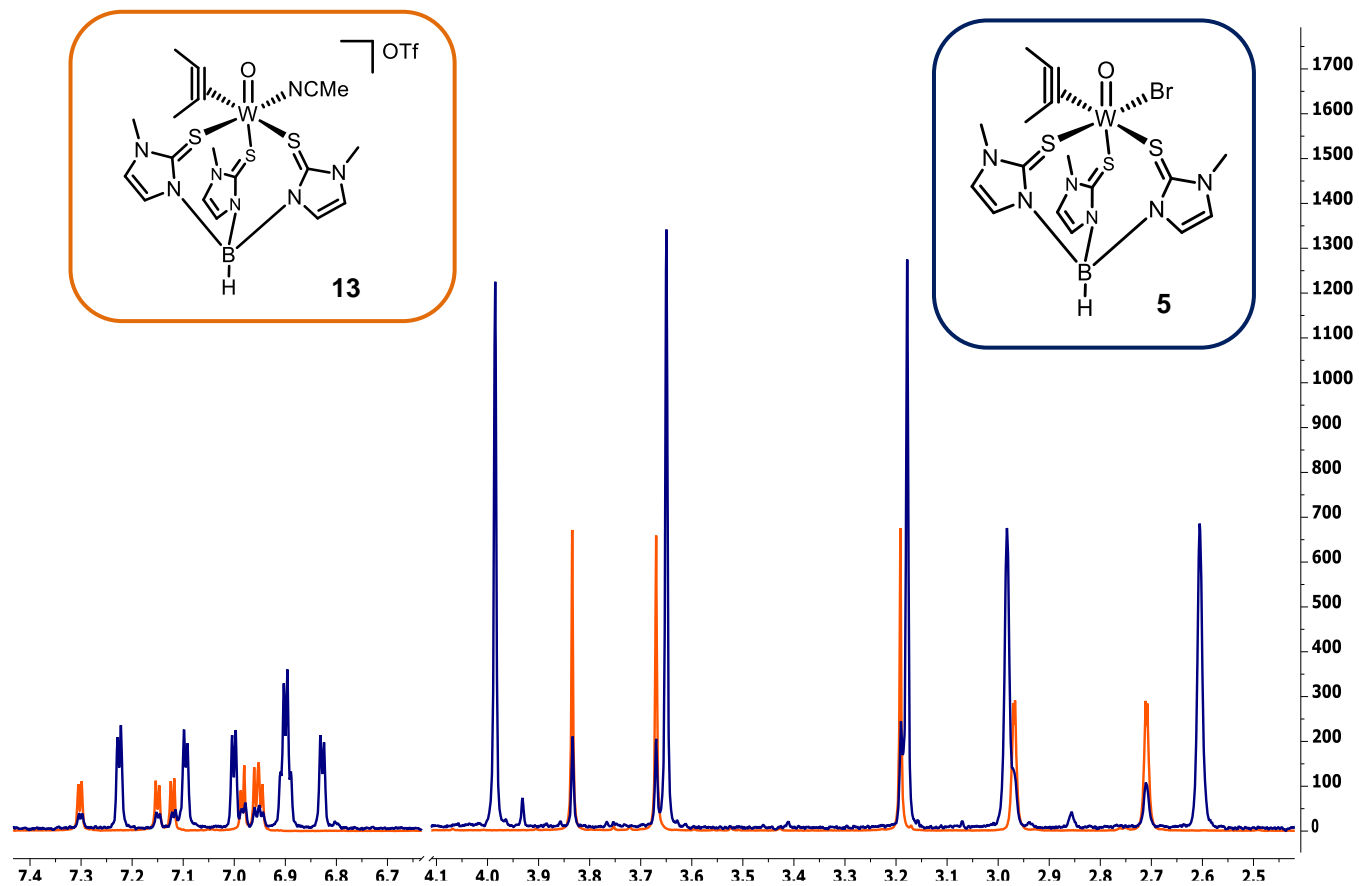

Figure S45: Superimposed spectra of  $[\text{WO}(\text{C}_2\text{Me}_2)(\text{Tm}^{\text{Me}})\text{Br}]$  (5, blue) and  $[\text{WO}(\text{C}_2\text{Me}_2)(\text{MeCN})(\text{Tm}^{\text{Me}})](\text{OTf})$  (13, orange) in  $\text{CD}_3\text{CN}$ .

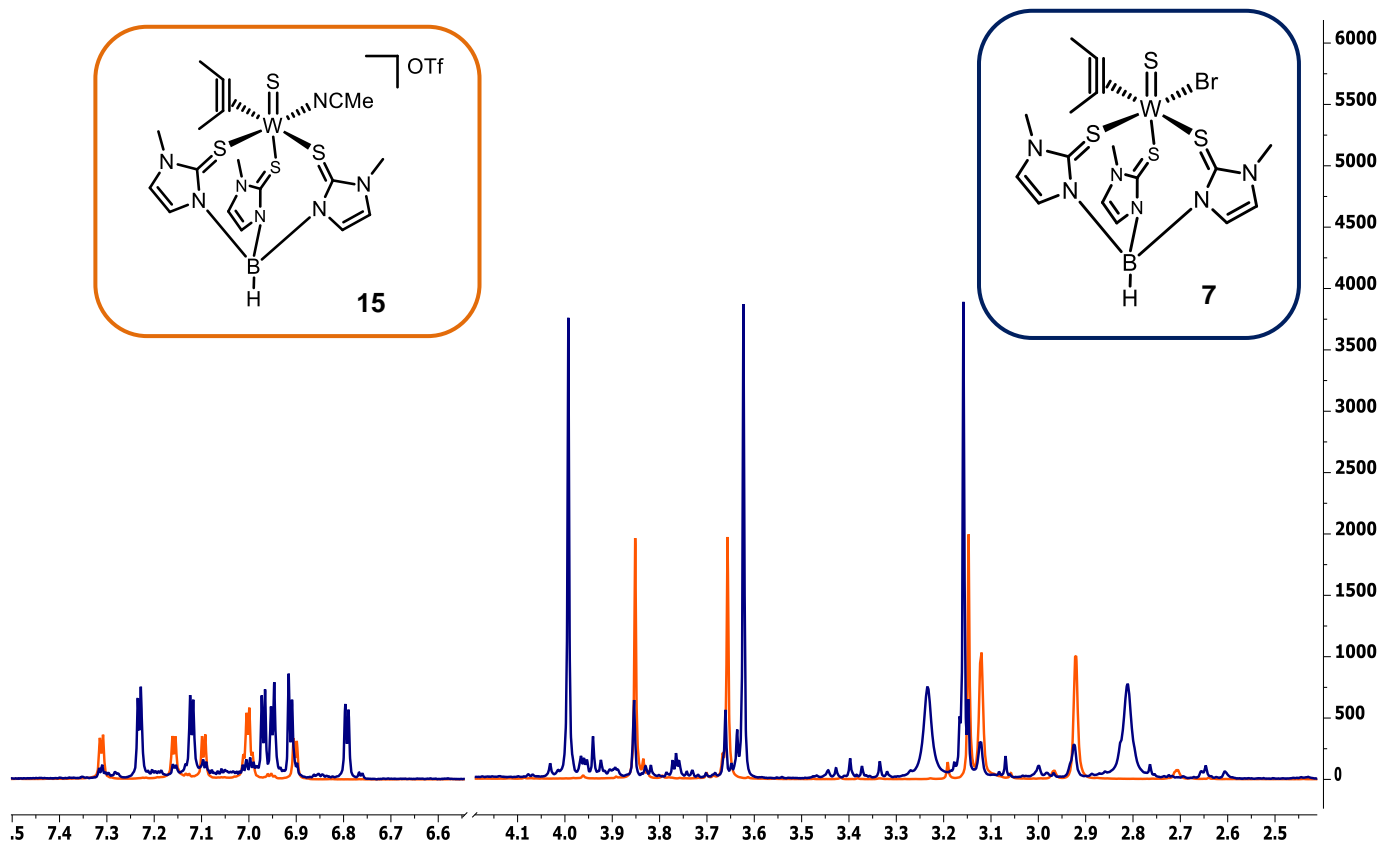

Figure S46: Superimposed spectra of  $[\text{WS}(\text{C}_2\text{Me}_2)(\text{Tm}^{\text{Me}})\text{Br}]$  (7, blue) and  $[\text{WS}(\text{C}_2\text{Me}_2)(\text{MeCN})(\text{Tm}^{\text{Me}})](\text{OTf})$  (15, orange) in  $\text{CD}_3\text{CN}$ .

### 3 HIGH-RESOLUTION MASS SPECTRA

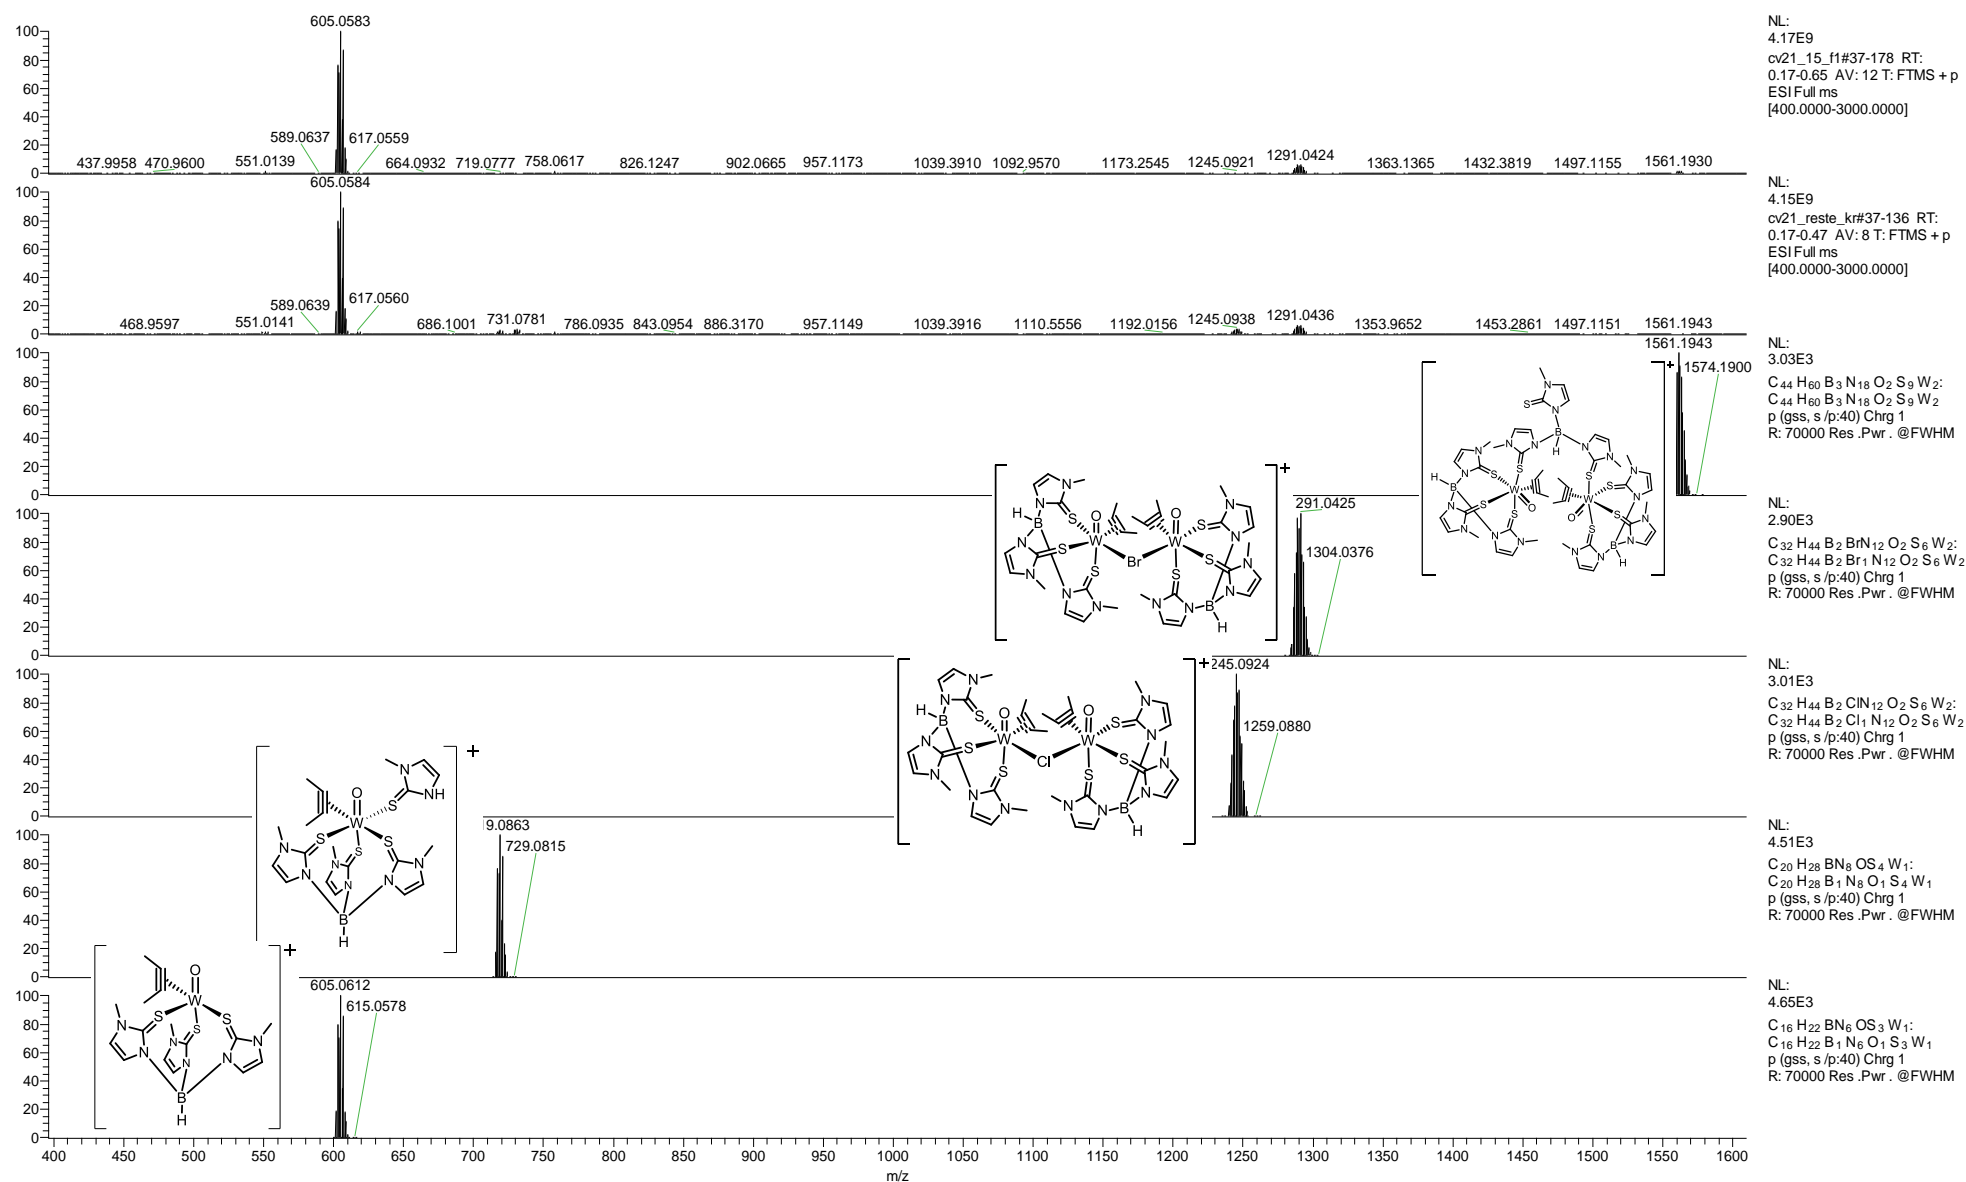

Figure S47: High-resolution mass spectrum of  $[\text{WO}(\text{C}_2\text{Me}_2)(\text{Tm}^{\text{Me}})\text{Br}_{0.82}\text{Cl}_{0.18}]$  (**5**) and the calculated masses of various fragments.

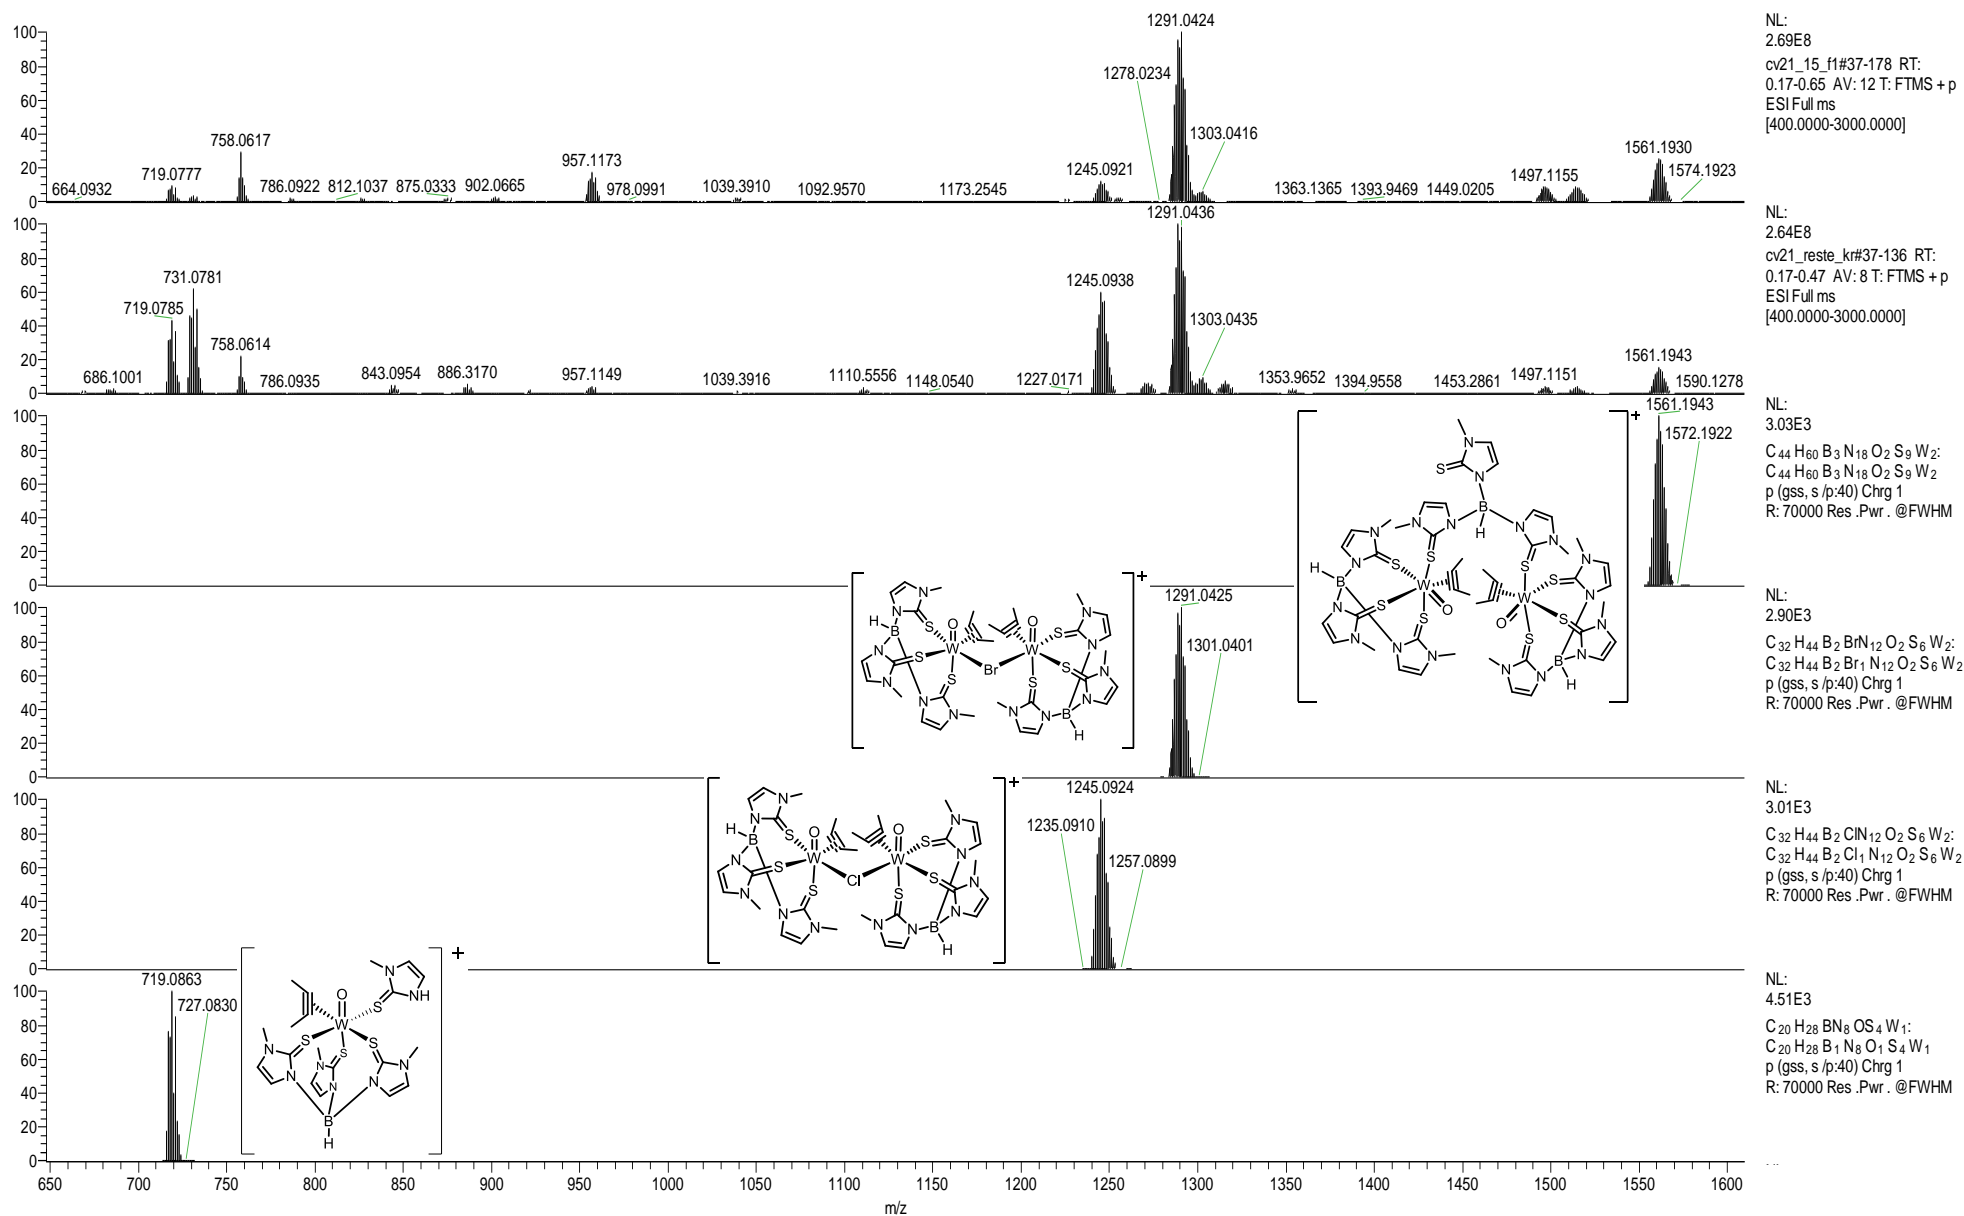

**Figure S48:** Zoomed in high-resolution mass spectrum of  $[WO(C_2Me_2)(Tm^{Me})Br_{0.82}Cl_{0.18}]$  (5) and the calculated masses of various fragments.



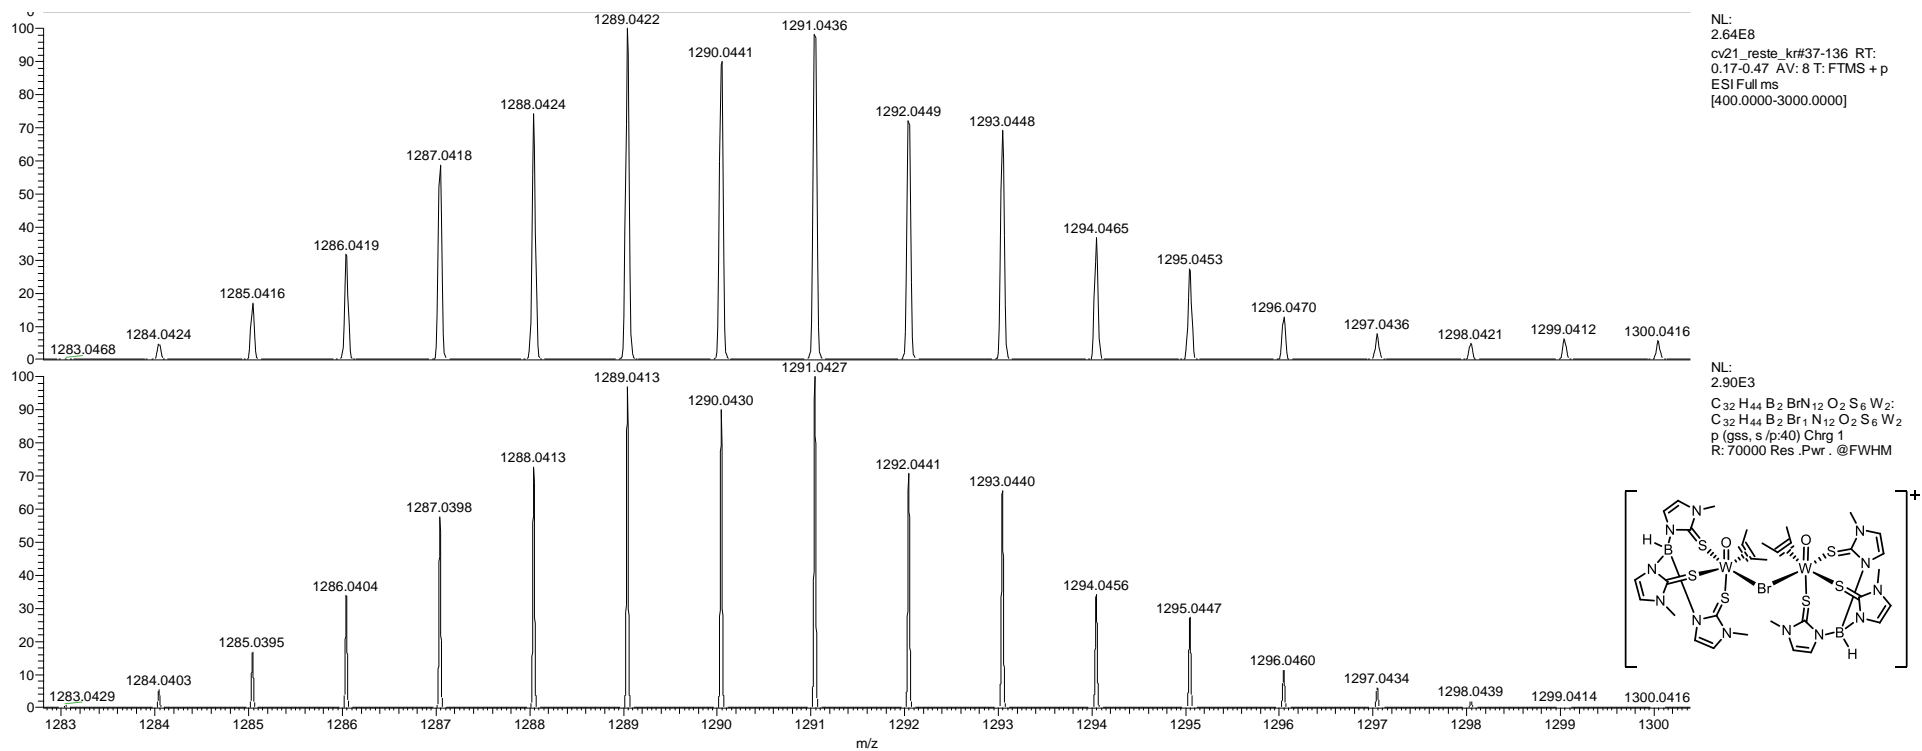

**Figure S49:** High-resolution mass spectrum of  $[\text{WO}(\text{C}_2\text{Me}_2)(\text{Tm}^{\text{Me}})\text{Br}_{0.82}\text{Cl}_{0.18}]$  (**5**) showing the peak for the  $[\text{WO}(\text{C}_2\text{Me}_2)(\text{Tm}^{\text{Me}})(\mu\text{-Br})(\text{Tm}^{\text{Me}})(\text{C}_2\text{Me}_2)\text{OW}]^+$  ion (top) and its calculated mass (bottom).

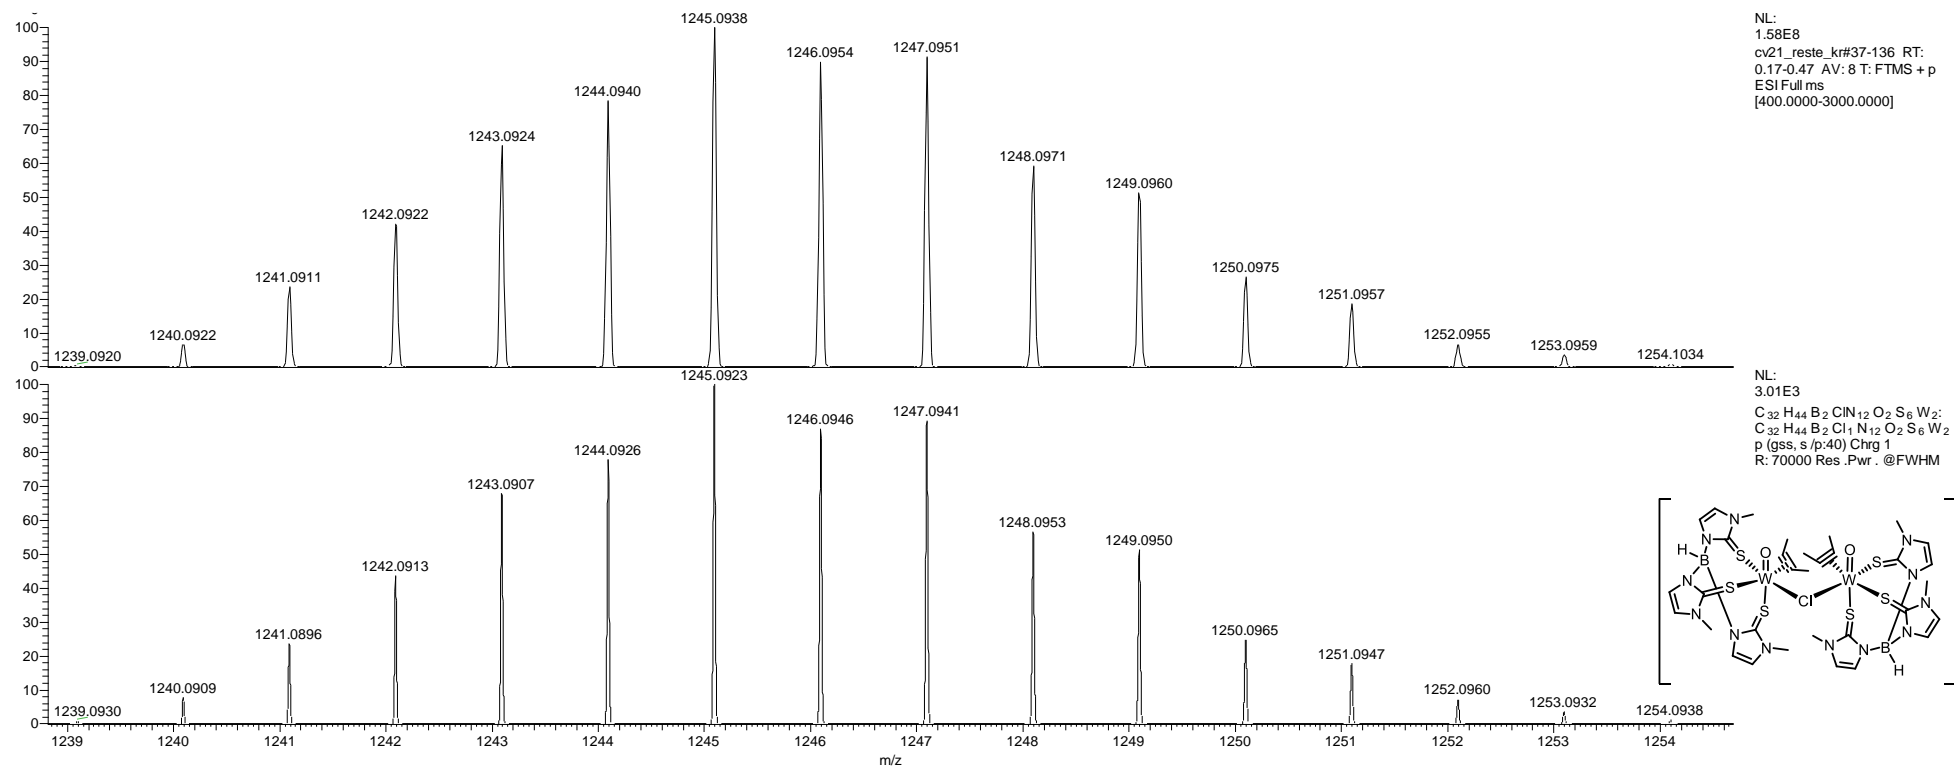

**Figure S50:** High-resolution mass spectrum of  $[\text{WO}(\text{C}_2\text{Me}_2)(\text{Tm}^{\text{Me}})\text{Br}_{0.82}\text{Cl}_{0.18}]$  (**5**) showing the peak for the  $[\text{WO}(\text{C}_2\text{Me}_2)(\text{Tm}^{\text{Me}})(\mu\text{-Cl})(\text{Tm}^{\text{Me}})(\text{C}_2\text{Me}_2)\text{OW}]^+$  ion (top) and its calculated mass (bottom).

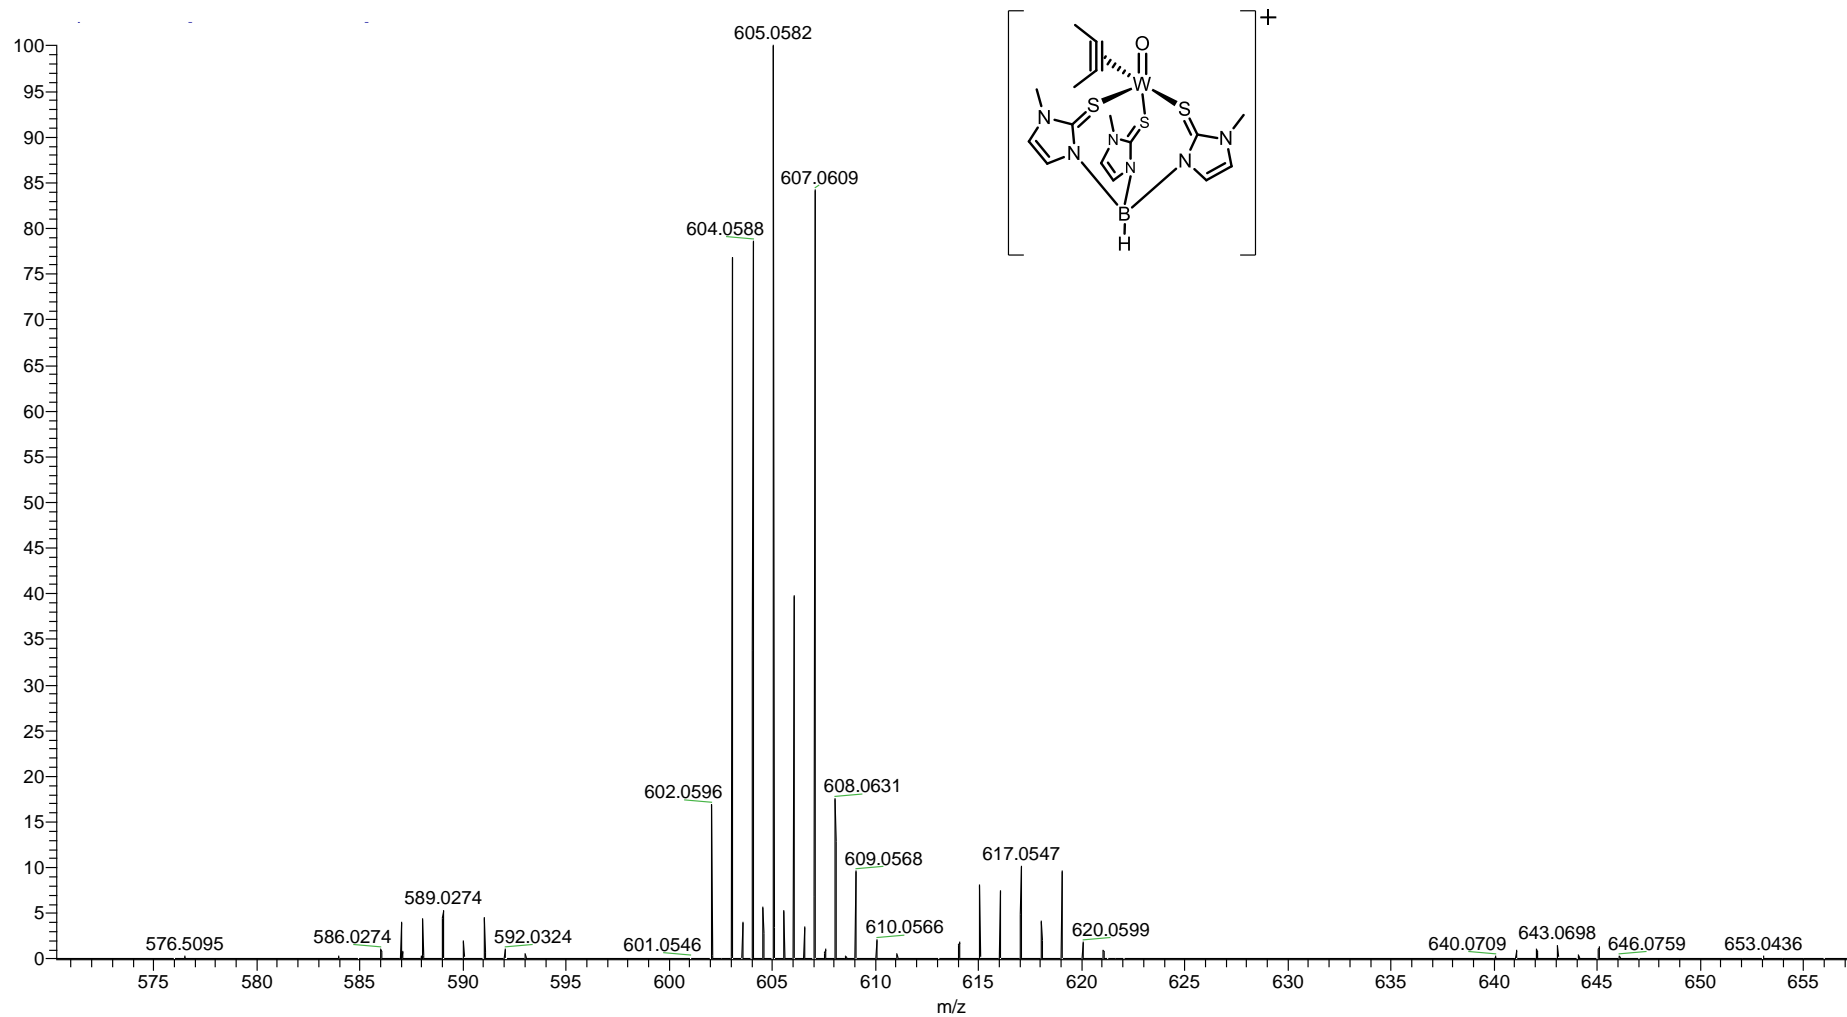

**Figure S51:** Zoomed in high-resolution mass spectrum of [W<sub>2</sub>O(μ-O)<sub>2</sub>(C<sub>2</sub>Me<sub>2</sub>)<sub>2</sub>(Tm<sup>Me</sup>)<sub>2</sub>](OTf)<sub>2</sub> (**8**) showing the peak for the [WO(C<sub>2</sub>Me<sub>2</sub>)(Tm<sup>Me</sup>)]<sup>+</sup> fragment. .

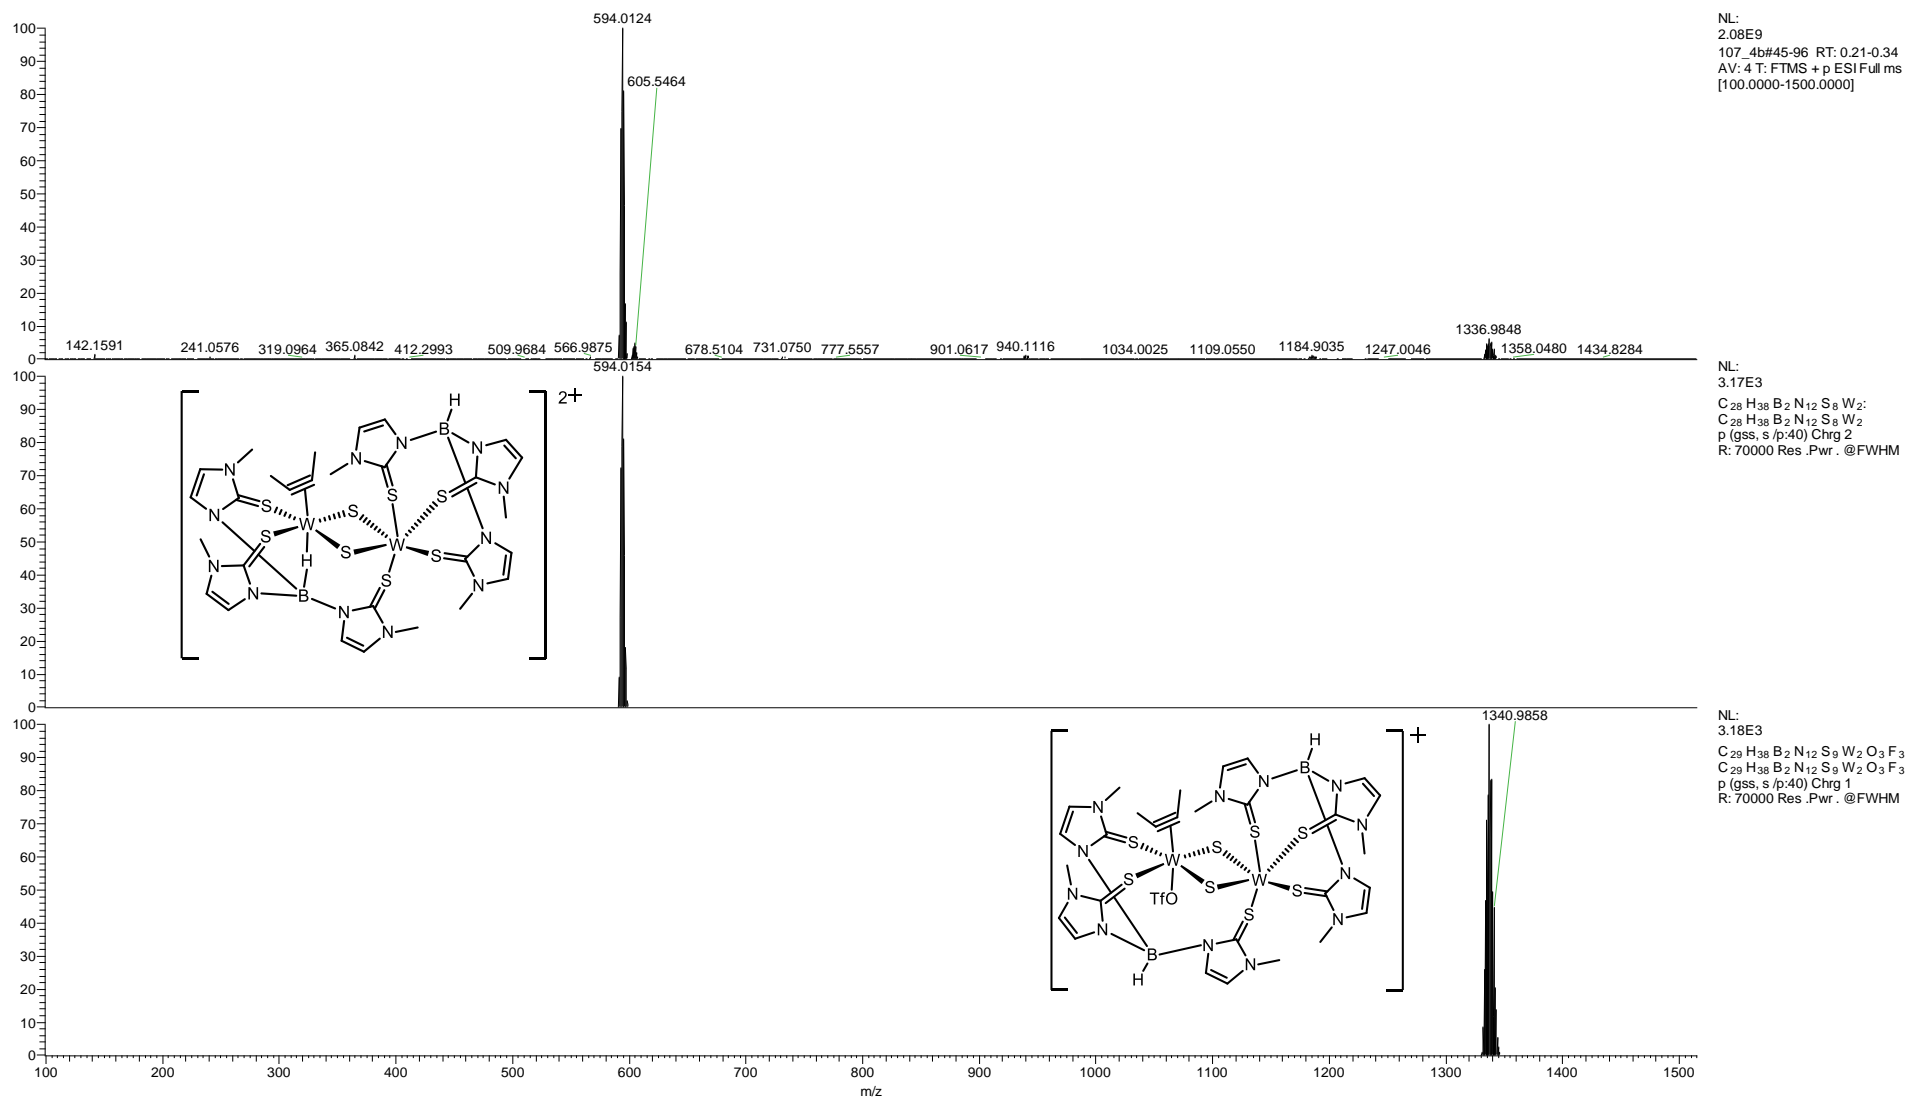

Figure S52: High-resolution mass spectrum of  $[W_2(\mu-S)_2(C_2Me_2)(Tm^{Me})_2](OTf)_2$  (**9**) and the calculated masses of various fragments.

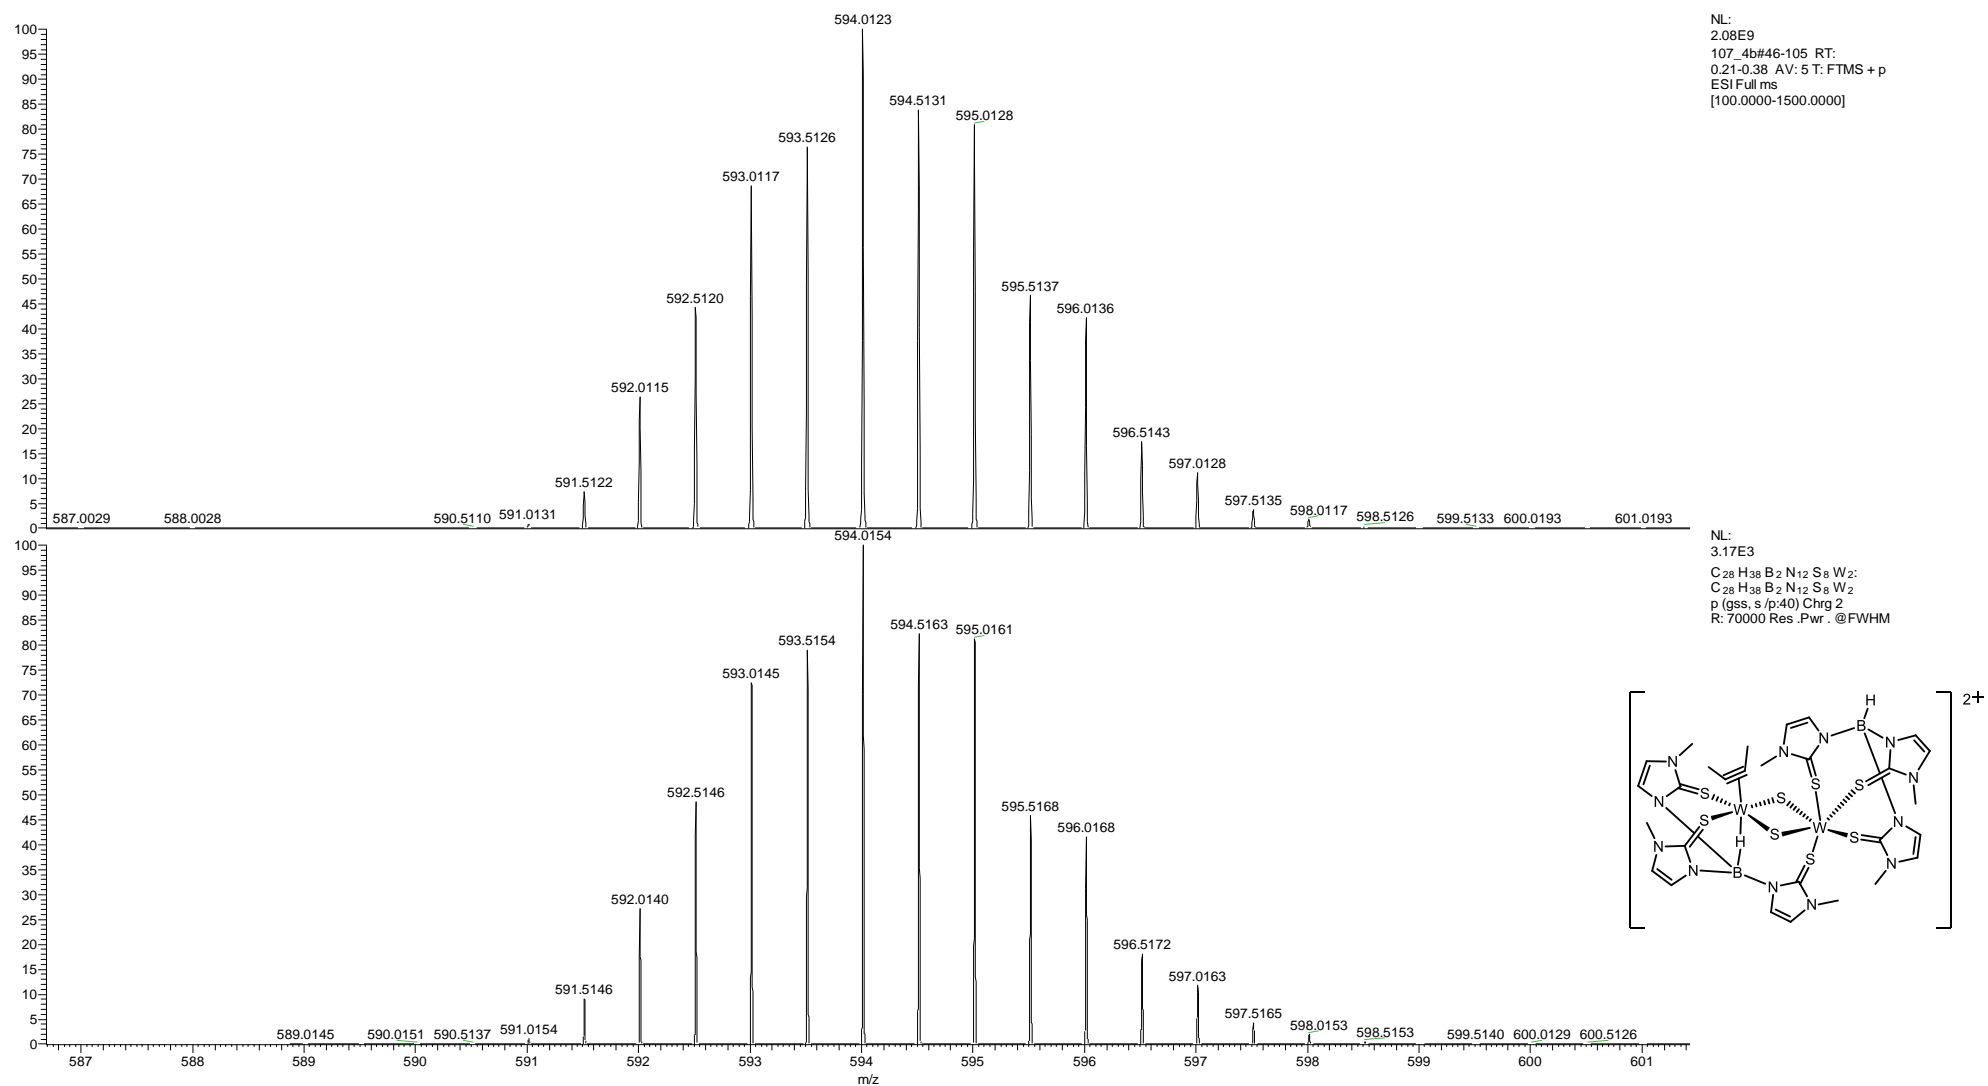

**Figure S53:** High-resolution mass spectrum of  $[W_2(\mu-S)_2(C_2Me)_2(Tm^{Me})_2](OTf)_2$  (**9**) showing the peak for the  $[W_2(\mu-S)_2(C_2Me)_2(Tm^{Me})_2]^{2+}$  ion (top) and its calculated mass (bottom).

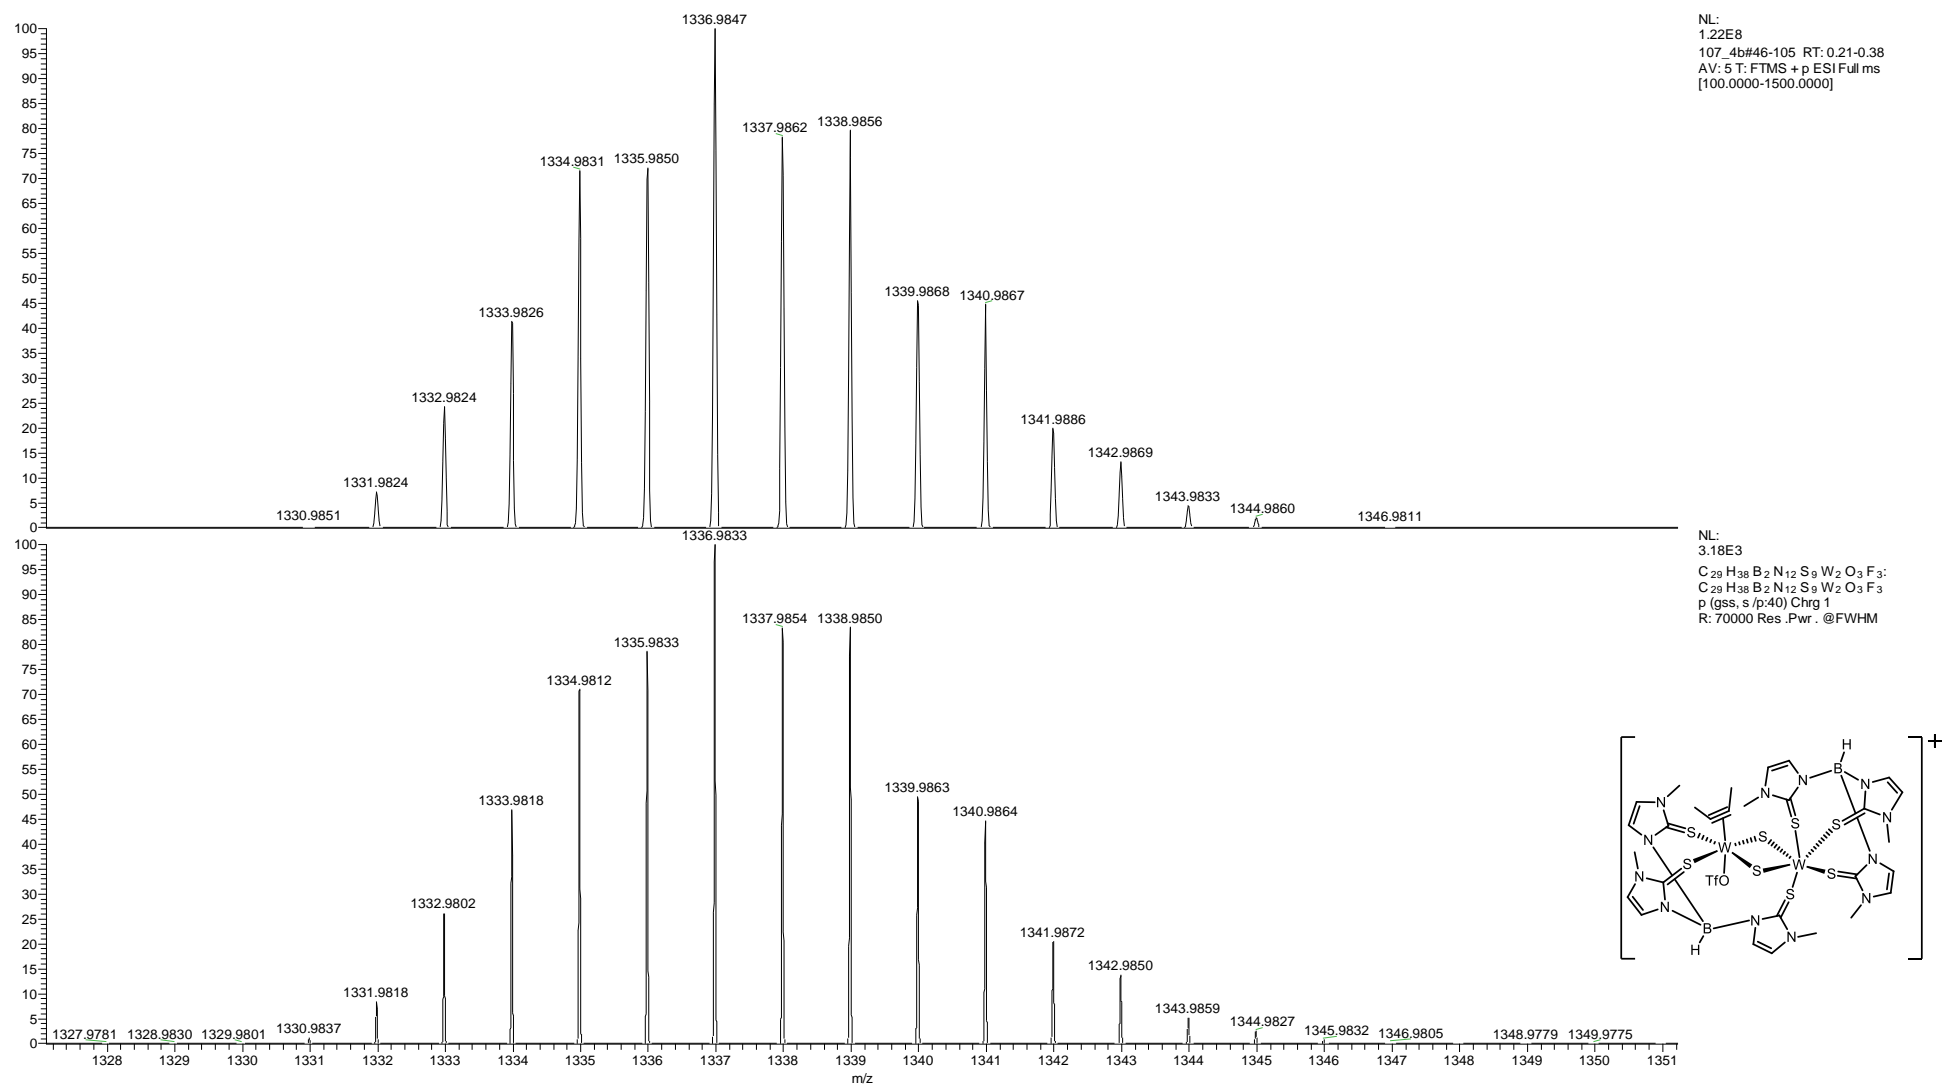

**Figure S54:** High-resolution mass spectrum of  $[W_2(\mu-S)_2(C_2Me_2)(Tm^{Me})_2](OTf)_2$  (**9**) showing the peak for the  $[W_2(\mu-S)_2(C_2Me_2)(Tm^{Me})_2](OTf)^+$  ion (top) and its calculated mass (bottom).

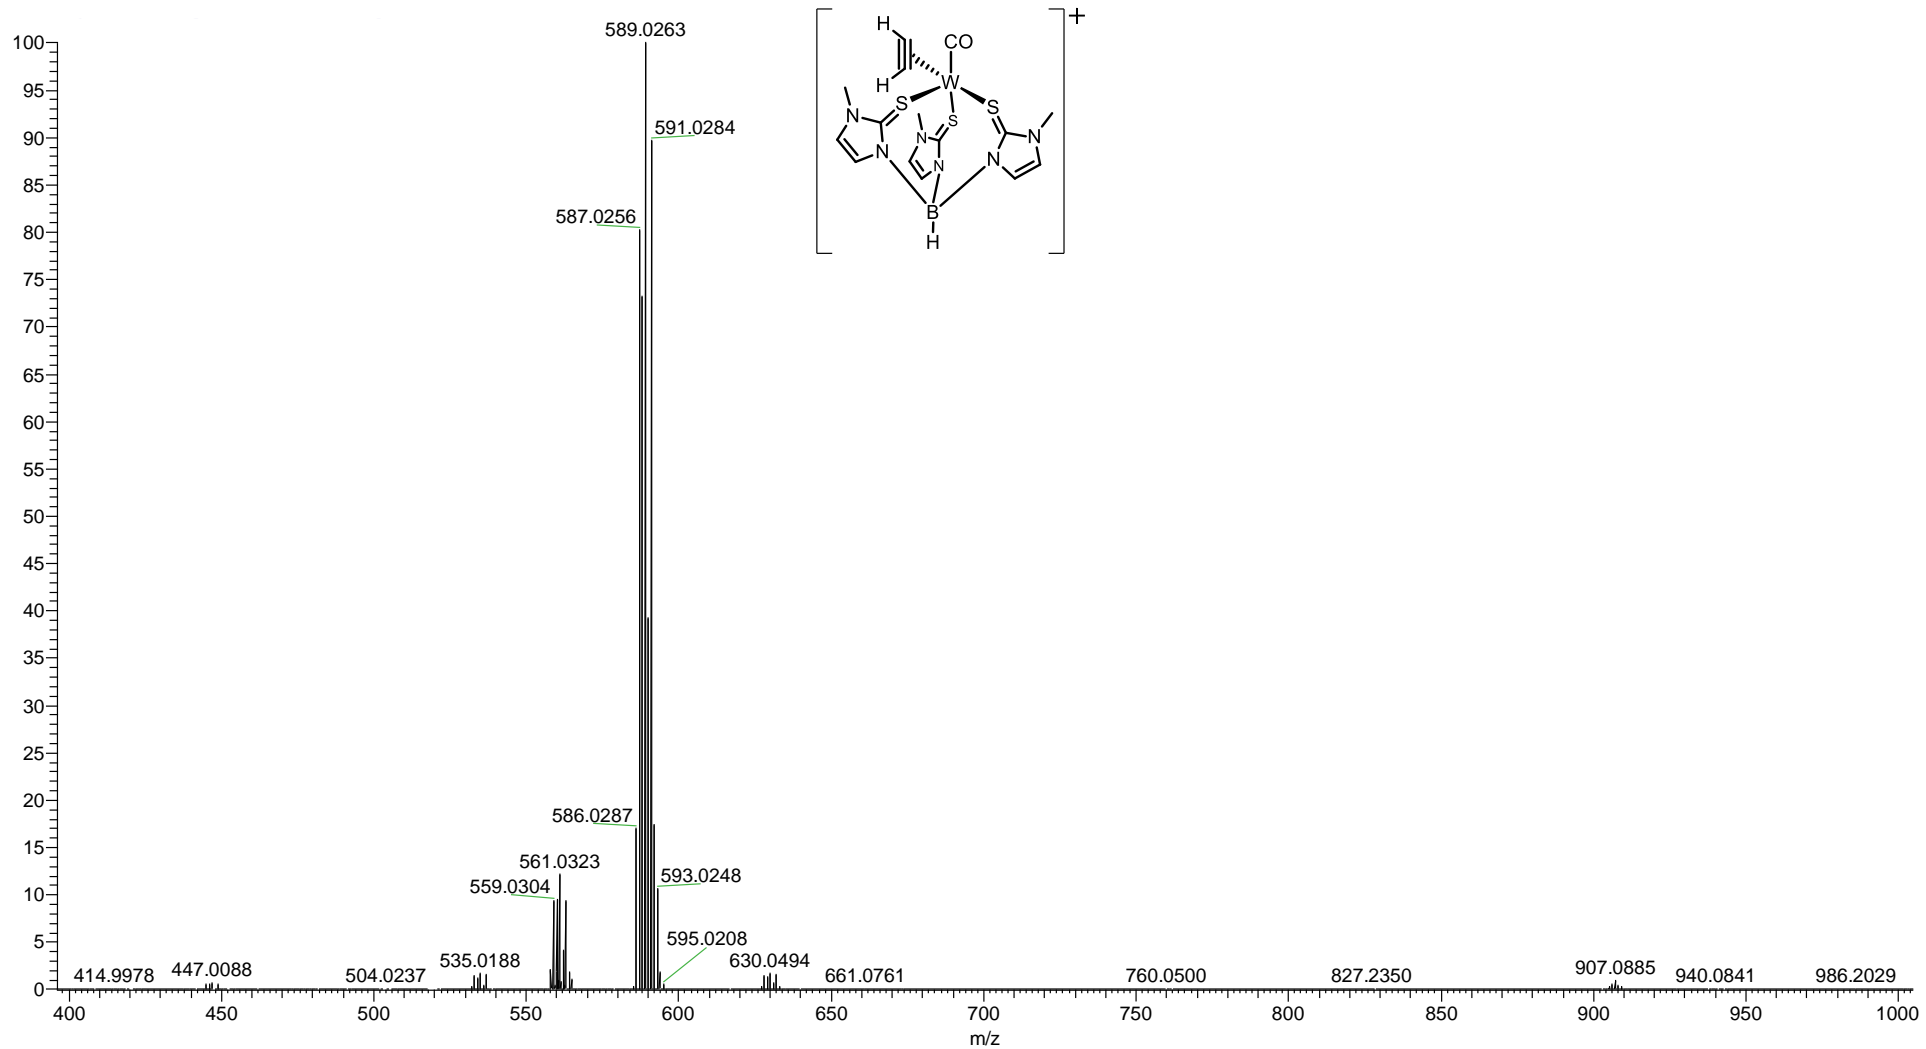

Figure S55: High-resolution mass spectrum of  $[W(CO)(C_2H_2)(MeCN)(Tm^Me)](OTf)$  (**10**).

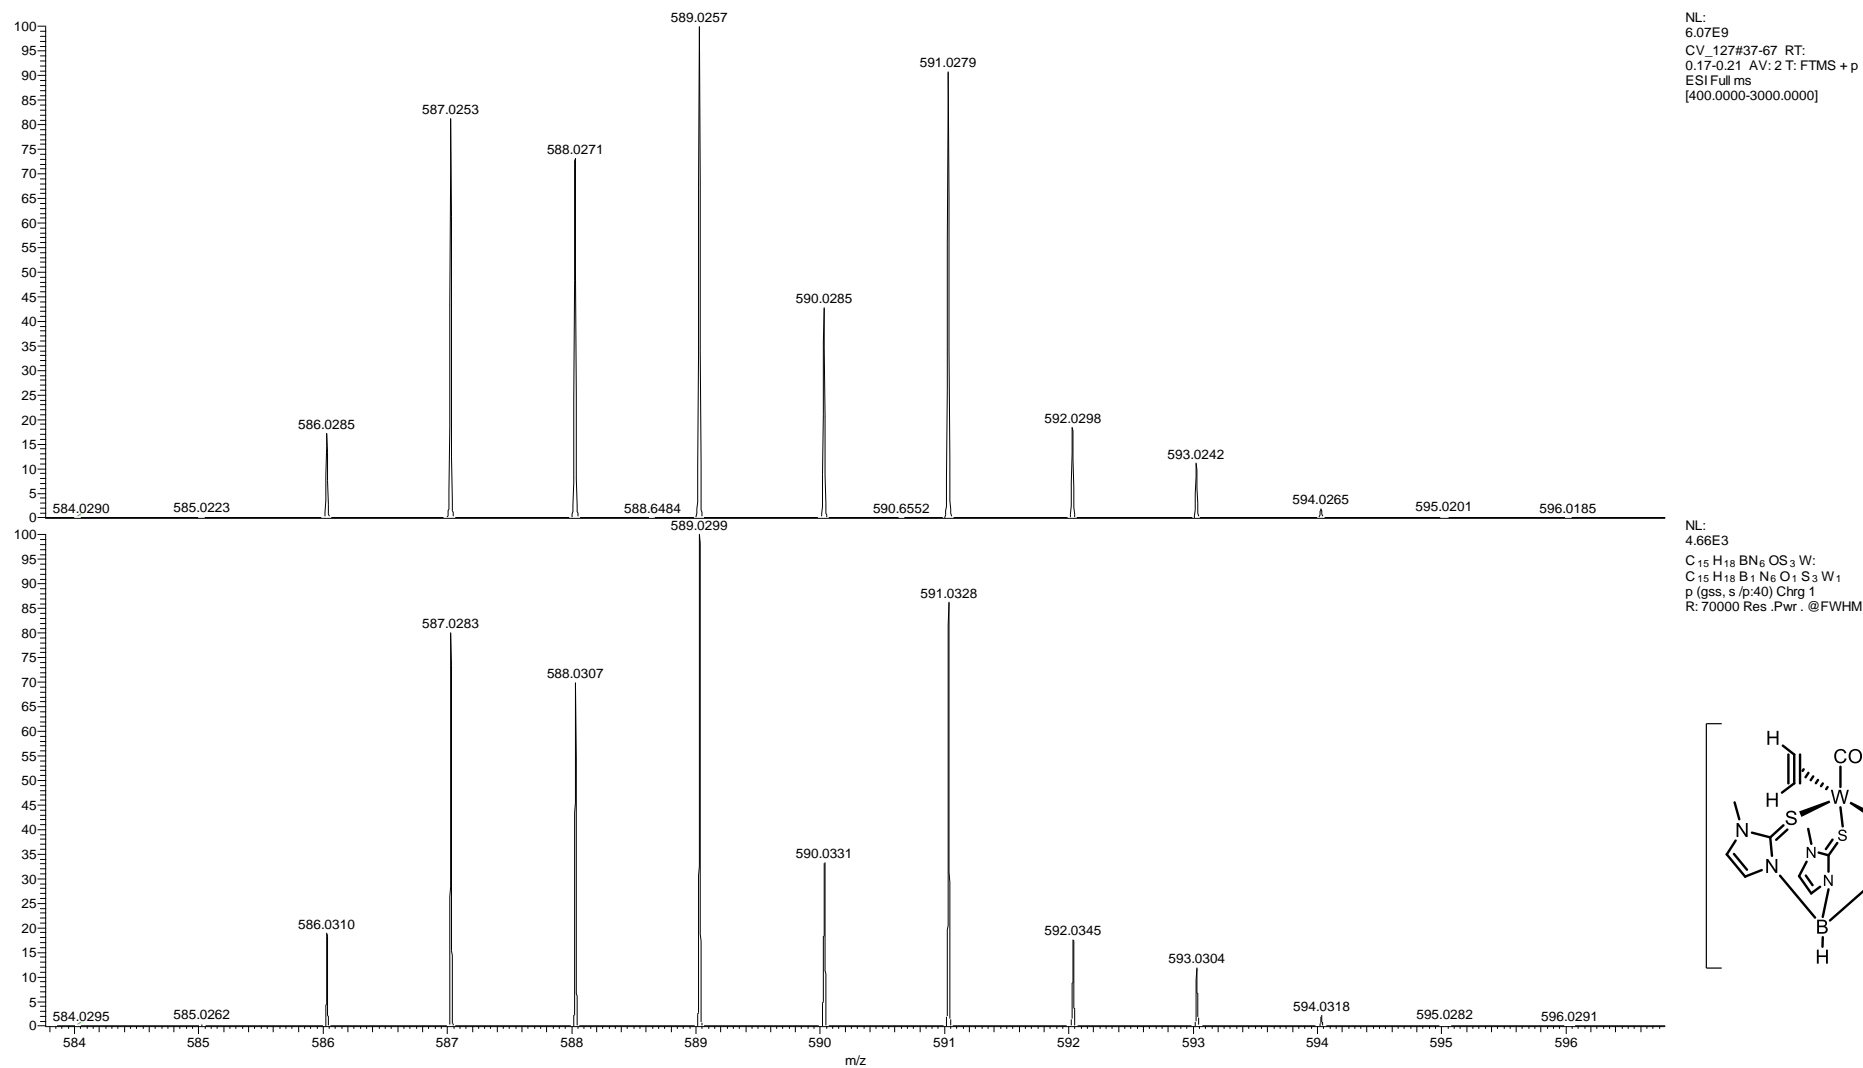

**Figure S56:** Zoomed in high-resolution mass spectrum of  $[W(CO)(C_2H_2)(MeCN)(Tm^{Me})](OTf)$  (**10**) showing the peak for the  $[WO(C_2H_2)(Tm^{Me})]^+$  ion (top) and its calculated mass (bottom).



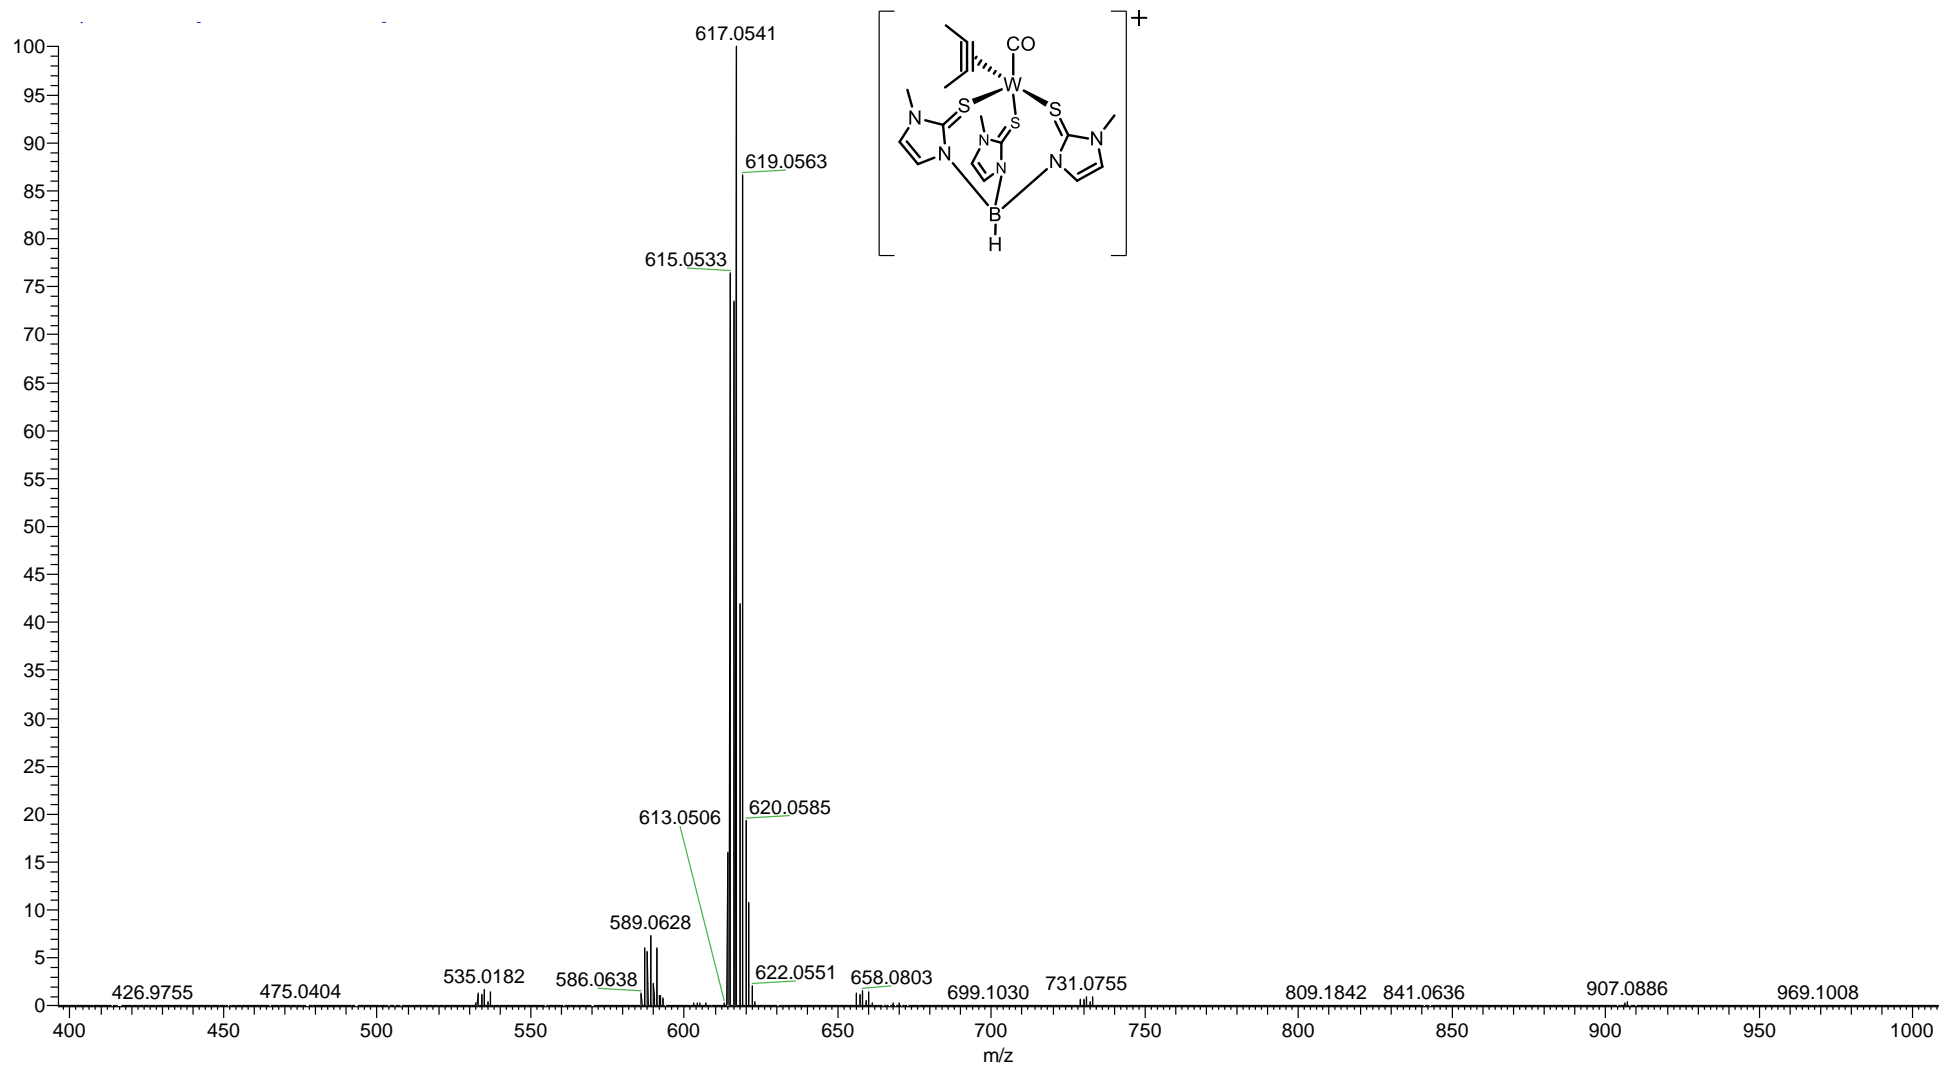

Figure S57: High-resolution mass spectrum of  $[W(CO)(C_2Me_2)(MeCN)(Tm^{Me})](OTf)$  (**11**).

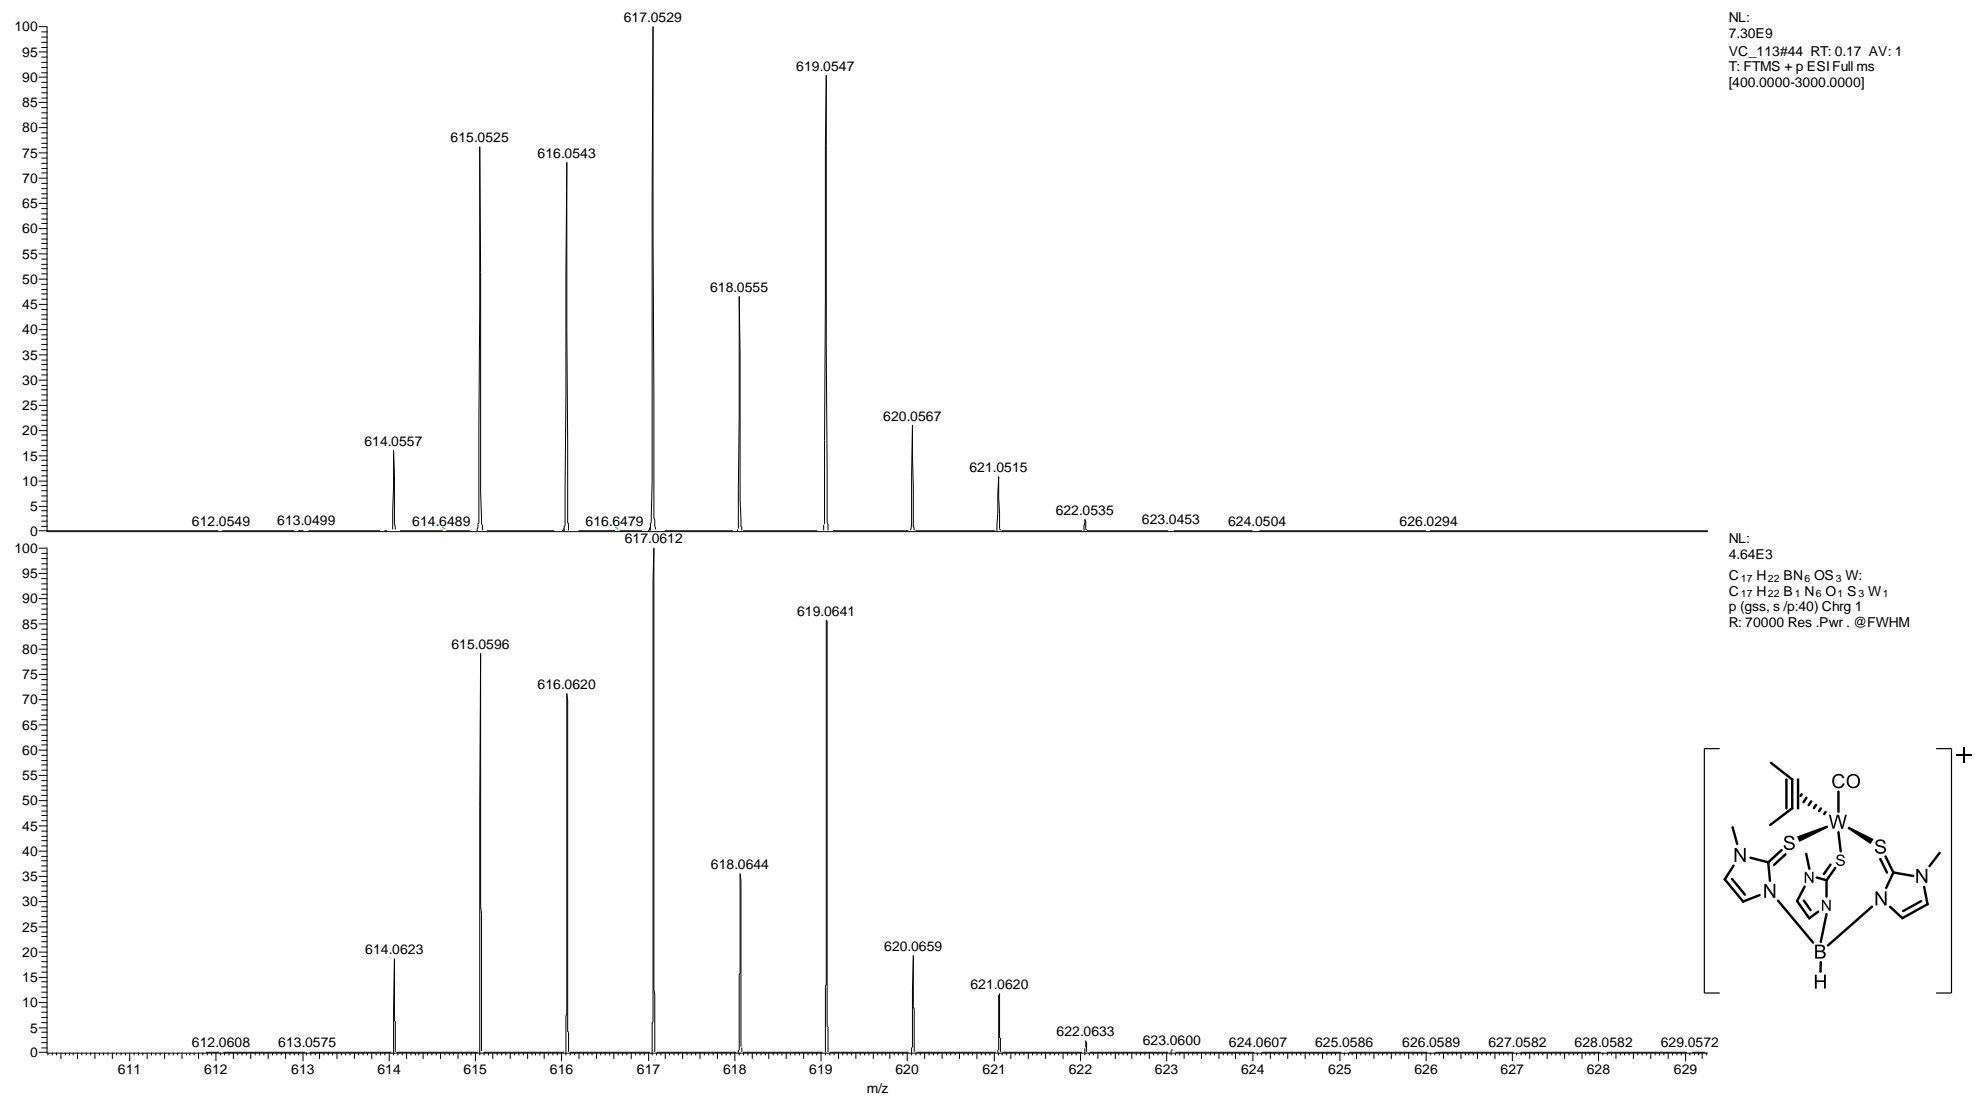

**Figure S58:** Zoomed in high-resolution mass spectrum of  $[W(CO)(C_2Me_2)(MeCN)(Tm^{Me})](OTf)$  (**11**) showing the peak for the  $[WO(C_2Me_2)(Tm^{Me})]^+$  ion (top) and its calculated mass (bottom).

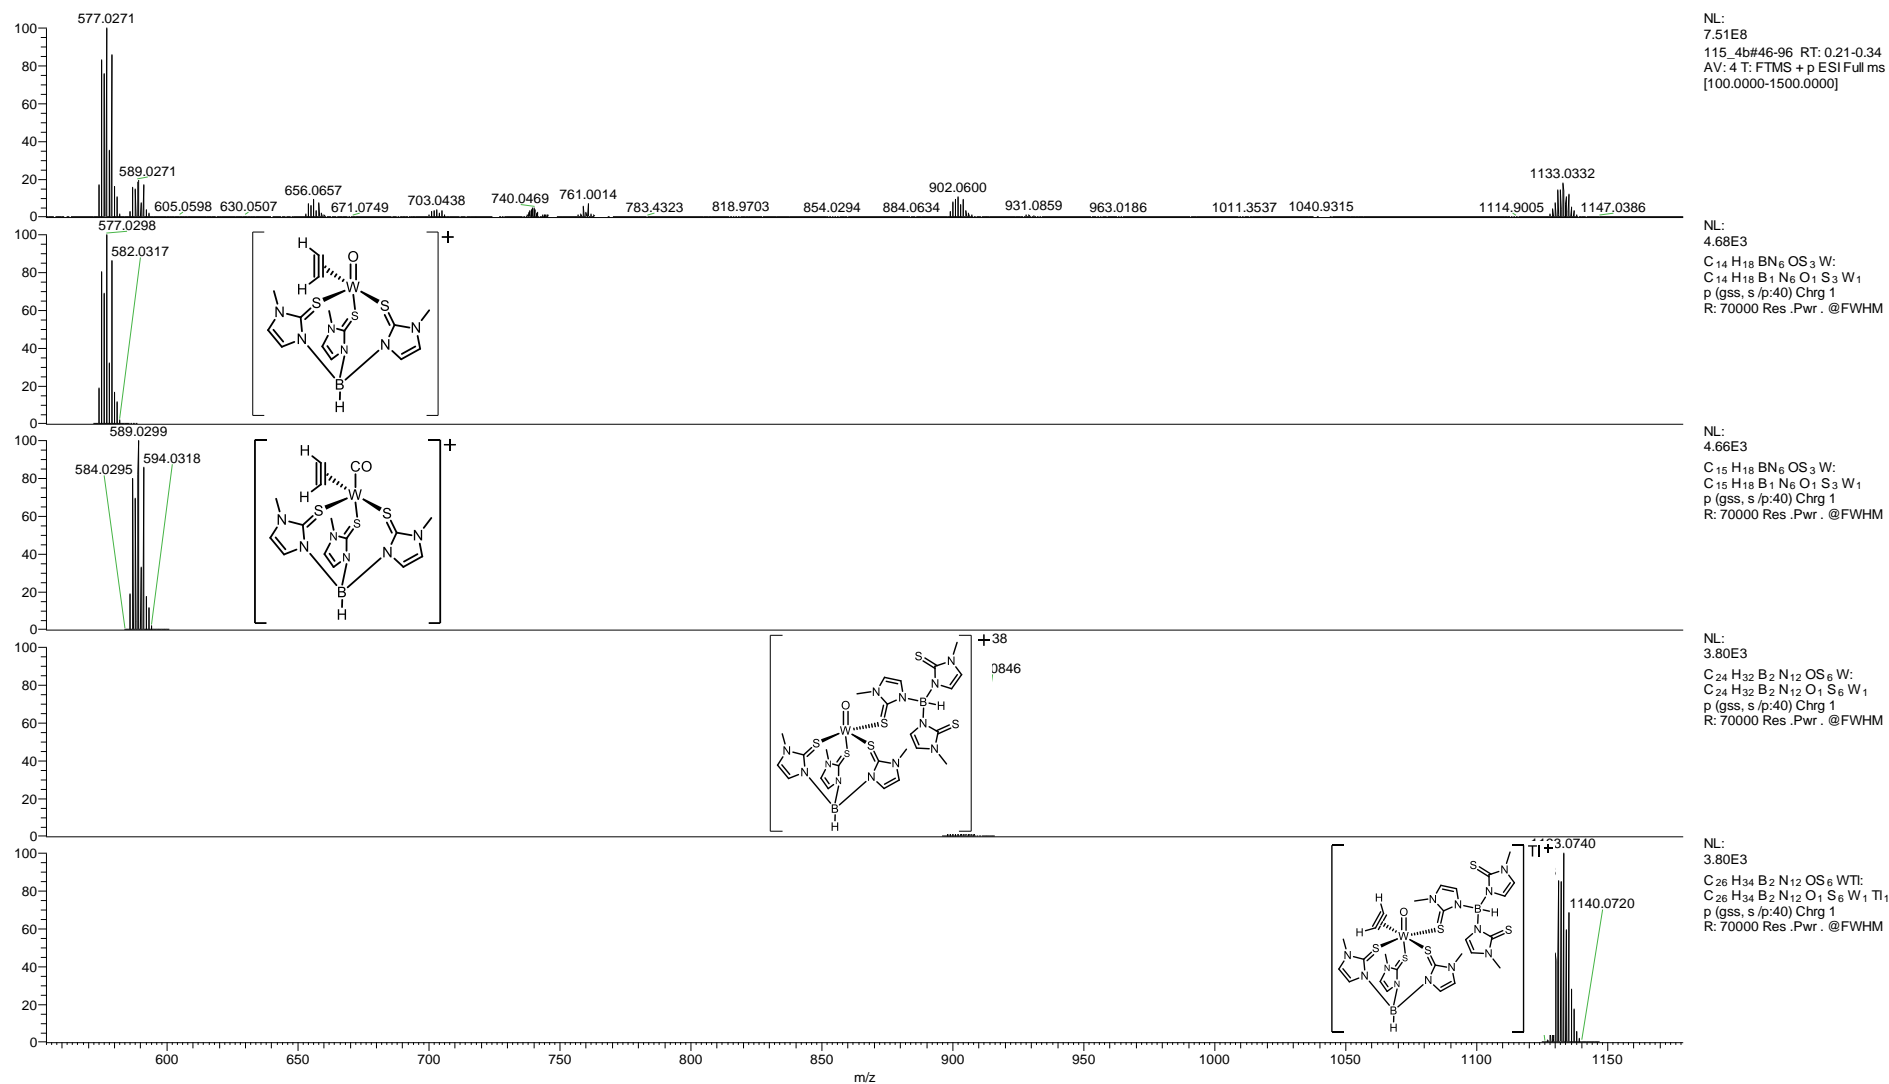

Figure S59: Zoomed in high-resolution mass spectrum of  $[\text{WO}(\text{C}_2\text{H}_2)(\text{MeCN})(\text{Tm}^{\text{Me}})](\text{OTf})$  (**12**) and the calculated masses of various fragments.

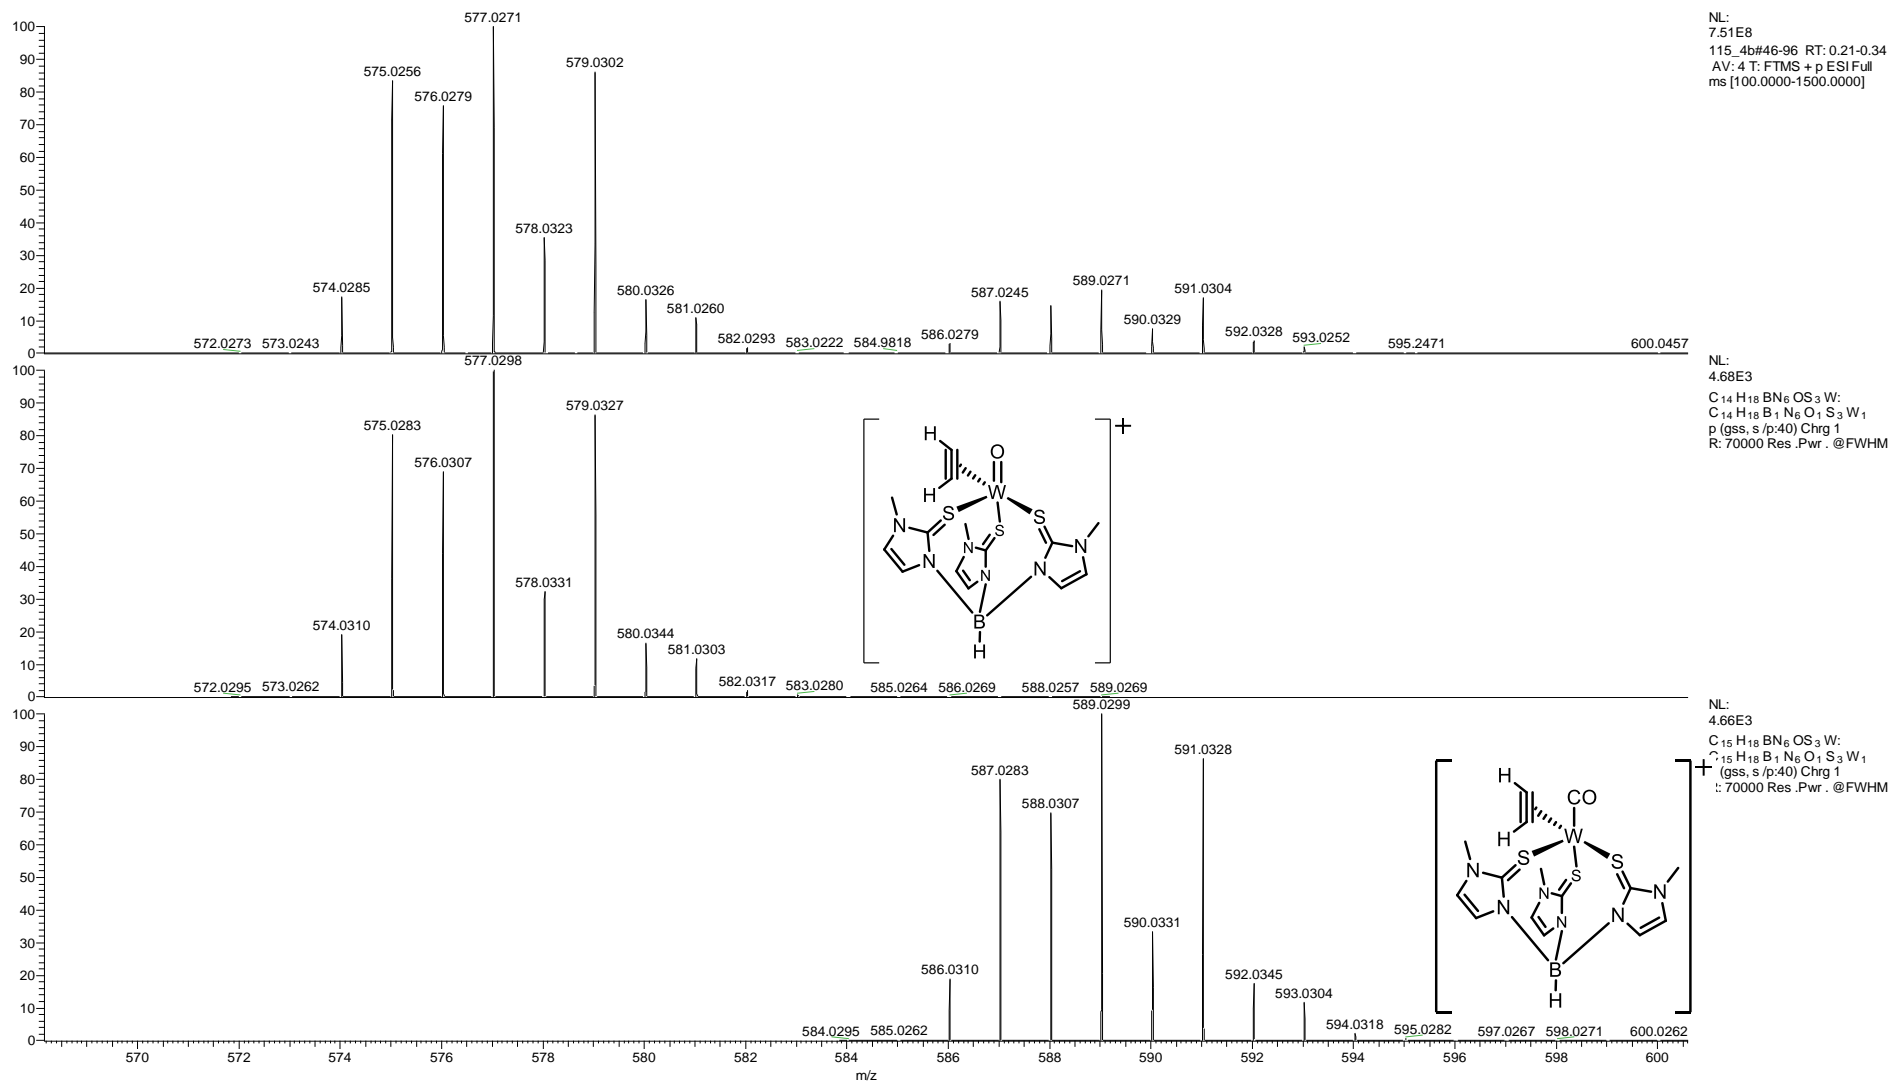

**Figure S60:** Closer zoom in high-resolution mass spectrum of  $[\text{WO}(\text{C}_2\text{H}_2)(\text{MeCN})(\text{Tm}^{\text{Me}})](\text{OTf})$  (**12**) showing the peak for the  $[\text{WO}(\text{C}_2\text{H}_2)(\text{Tm}^{\text{Me}})]^+$  and  $[\text{W}(\text{CO})(\text{C}_2\text{H}_2)(\text{Tm}^{\text{Me}})]^+$  ion (top) and its calculated masses (middle and bottom).

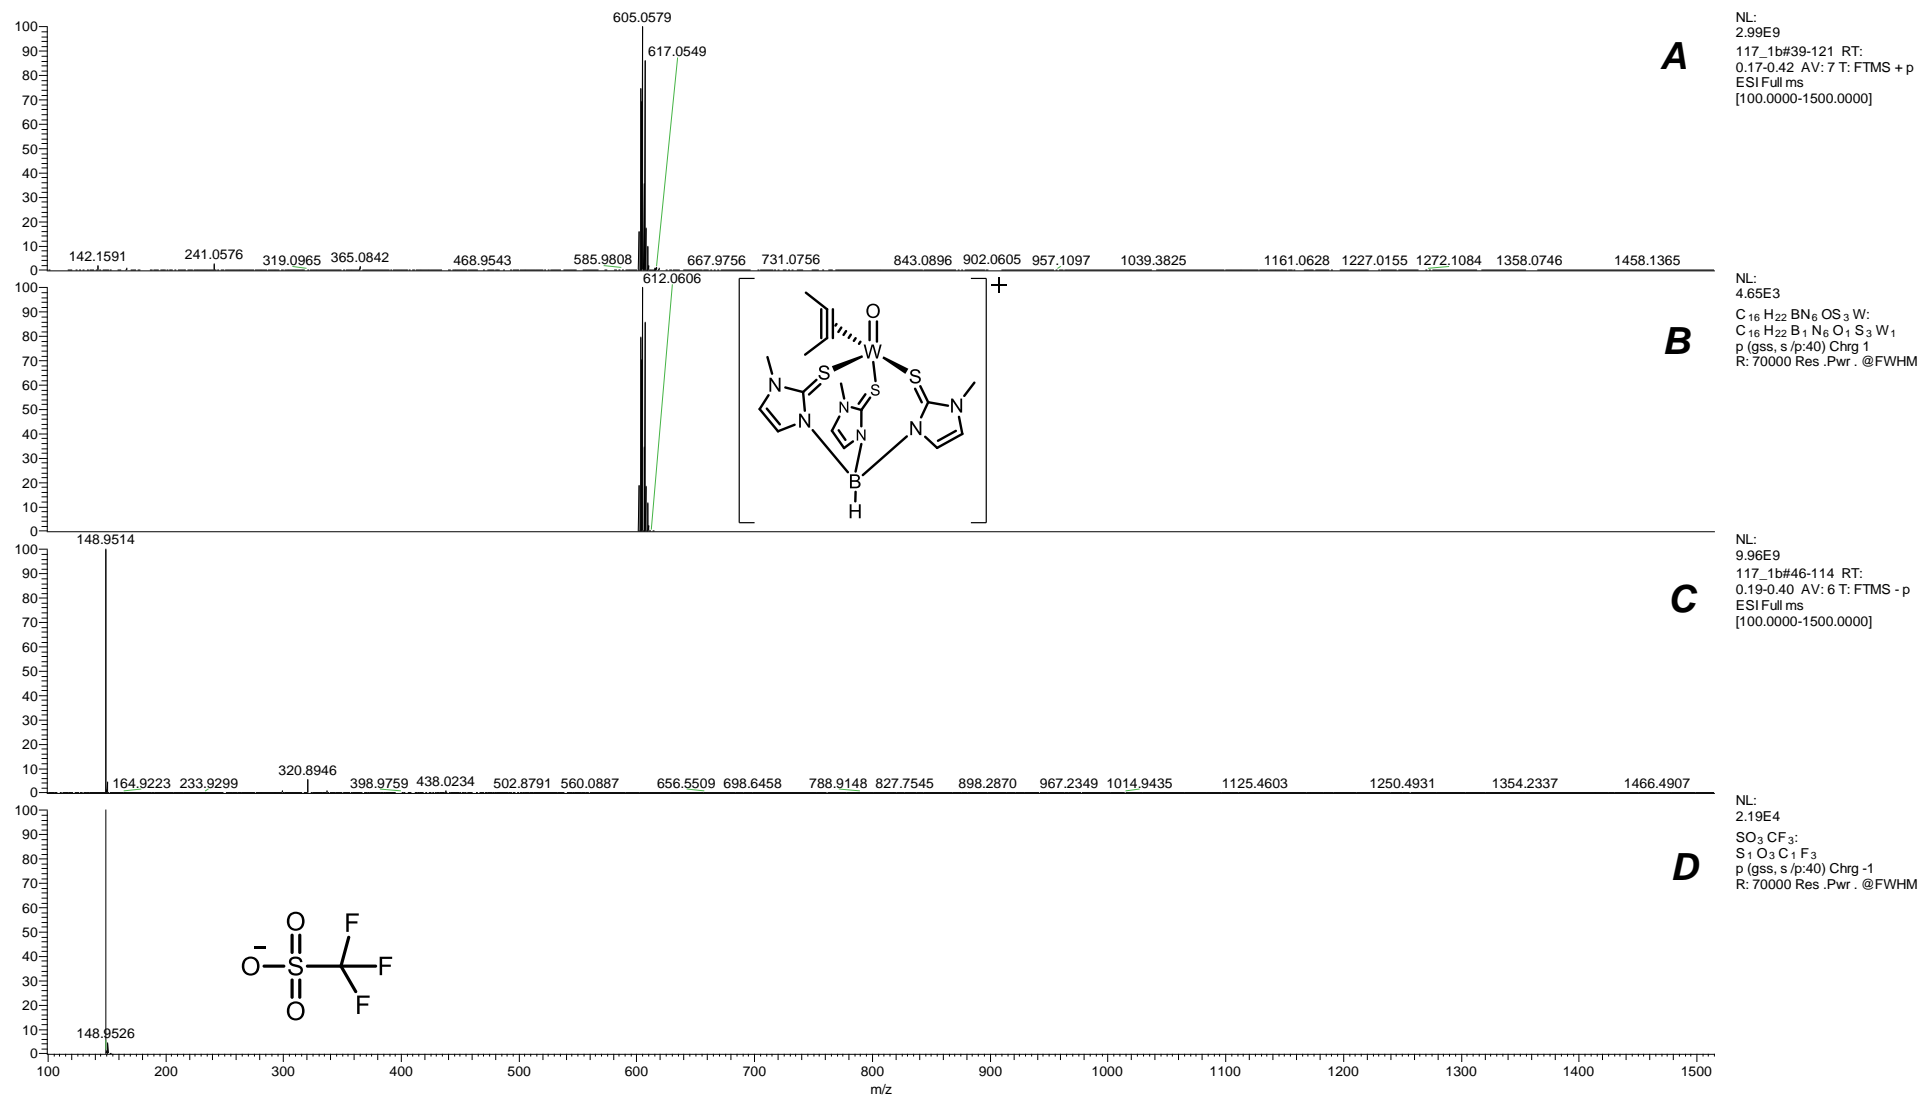

**Figure S61:** High-resolution mass spectrum of  $[\text{WO}(\text{C}_2\text{Me}_2)(\text{MeCN})(\text{Tm}^{\text{Me}})](\text{OTf})$  (**13**) showing the scan for cations (A) and for anions (B) and the calculated masses for  $[\text{WO}(\text{C}_2\text{Me}_2)(\text{Tm}^{\text{Me}})]^+$  (B) and  $(\text{OTf})^-$  ion (D).

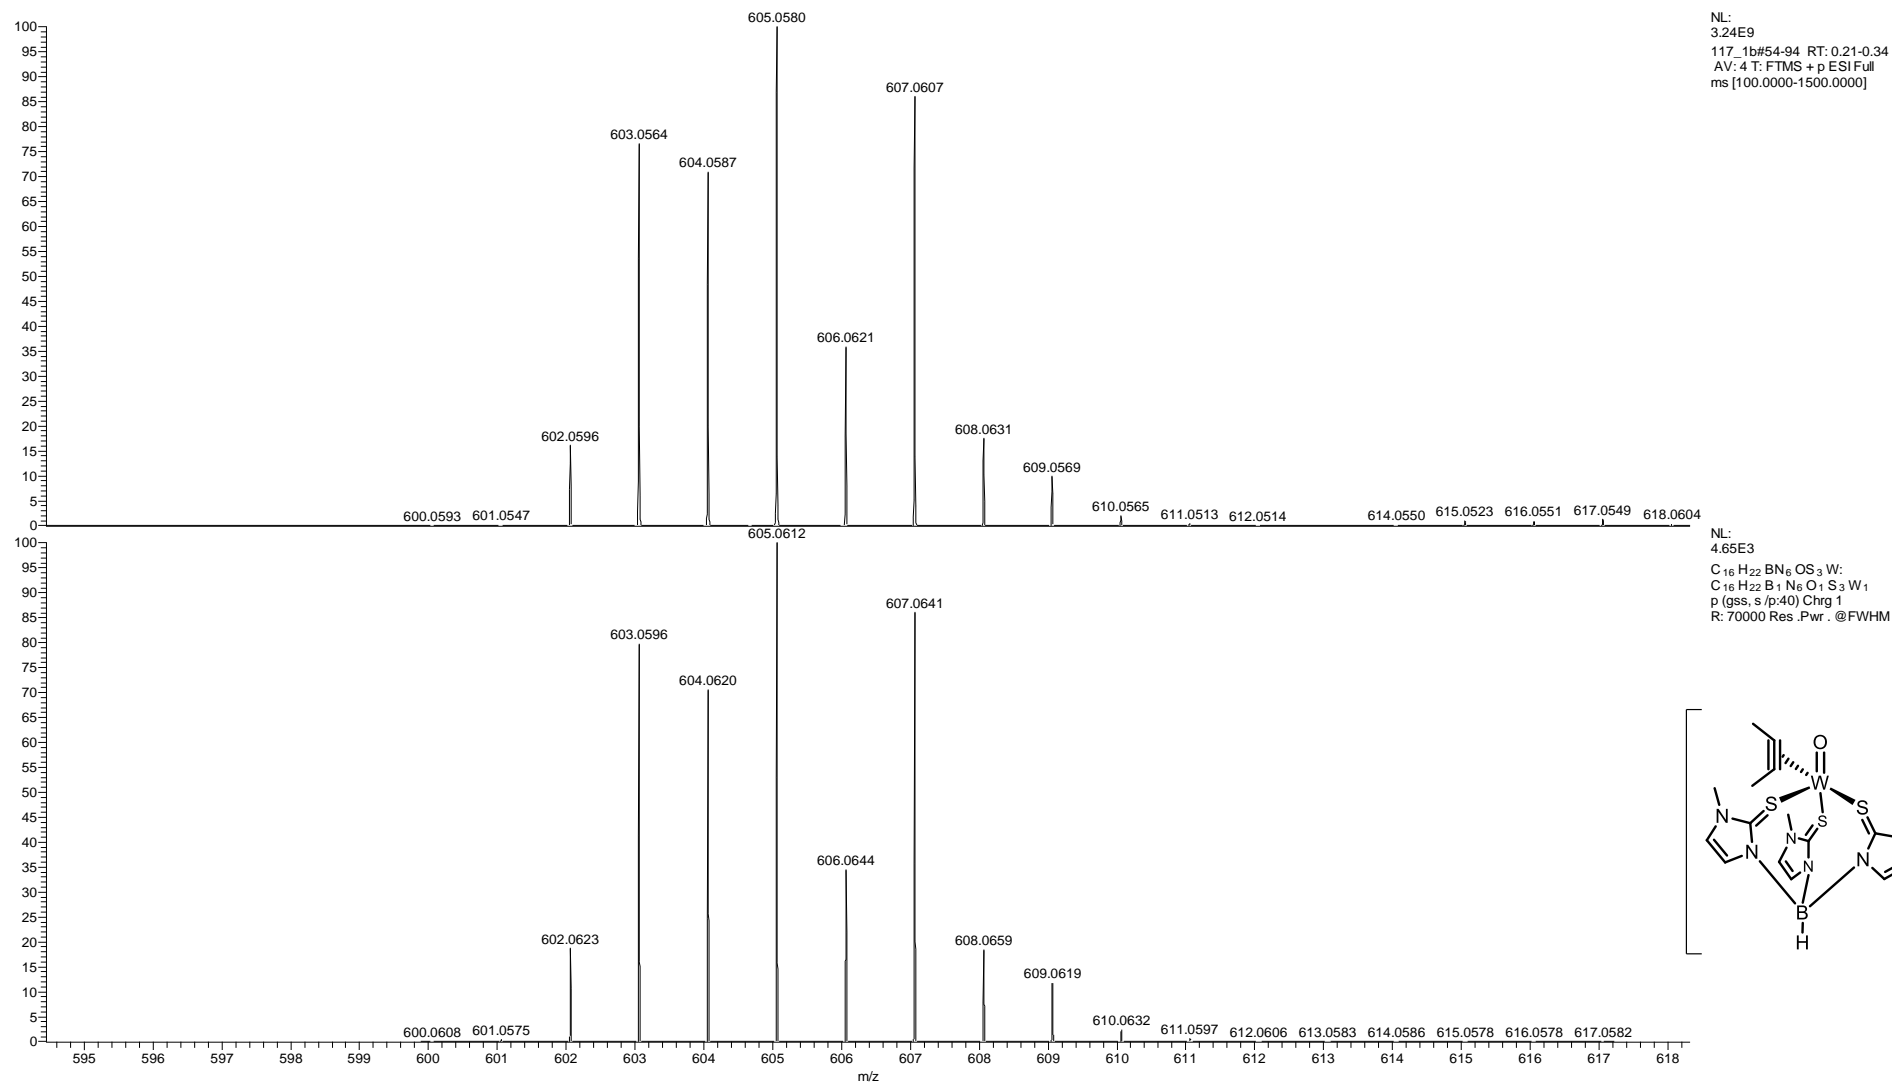

**Figure S62:** Zoomed in high-resolution mass spectrum of  $[\text{WO}(\text{C}_2\text{Me}_2)(\text{MeCN})(\text{Tm}^{\text{Me}})](\text{OTf})$  (**13**) showing the peak for the  $[\text{WO}(\text{C}_2\text{Me}_2)(\text{Tm}^{\text{Me}})]^+$  ion (top) and its calculated mass (bottom).

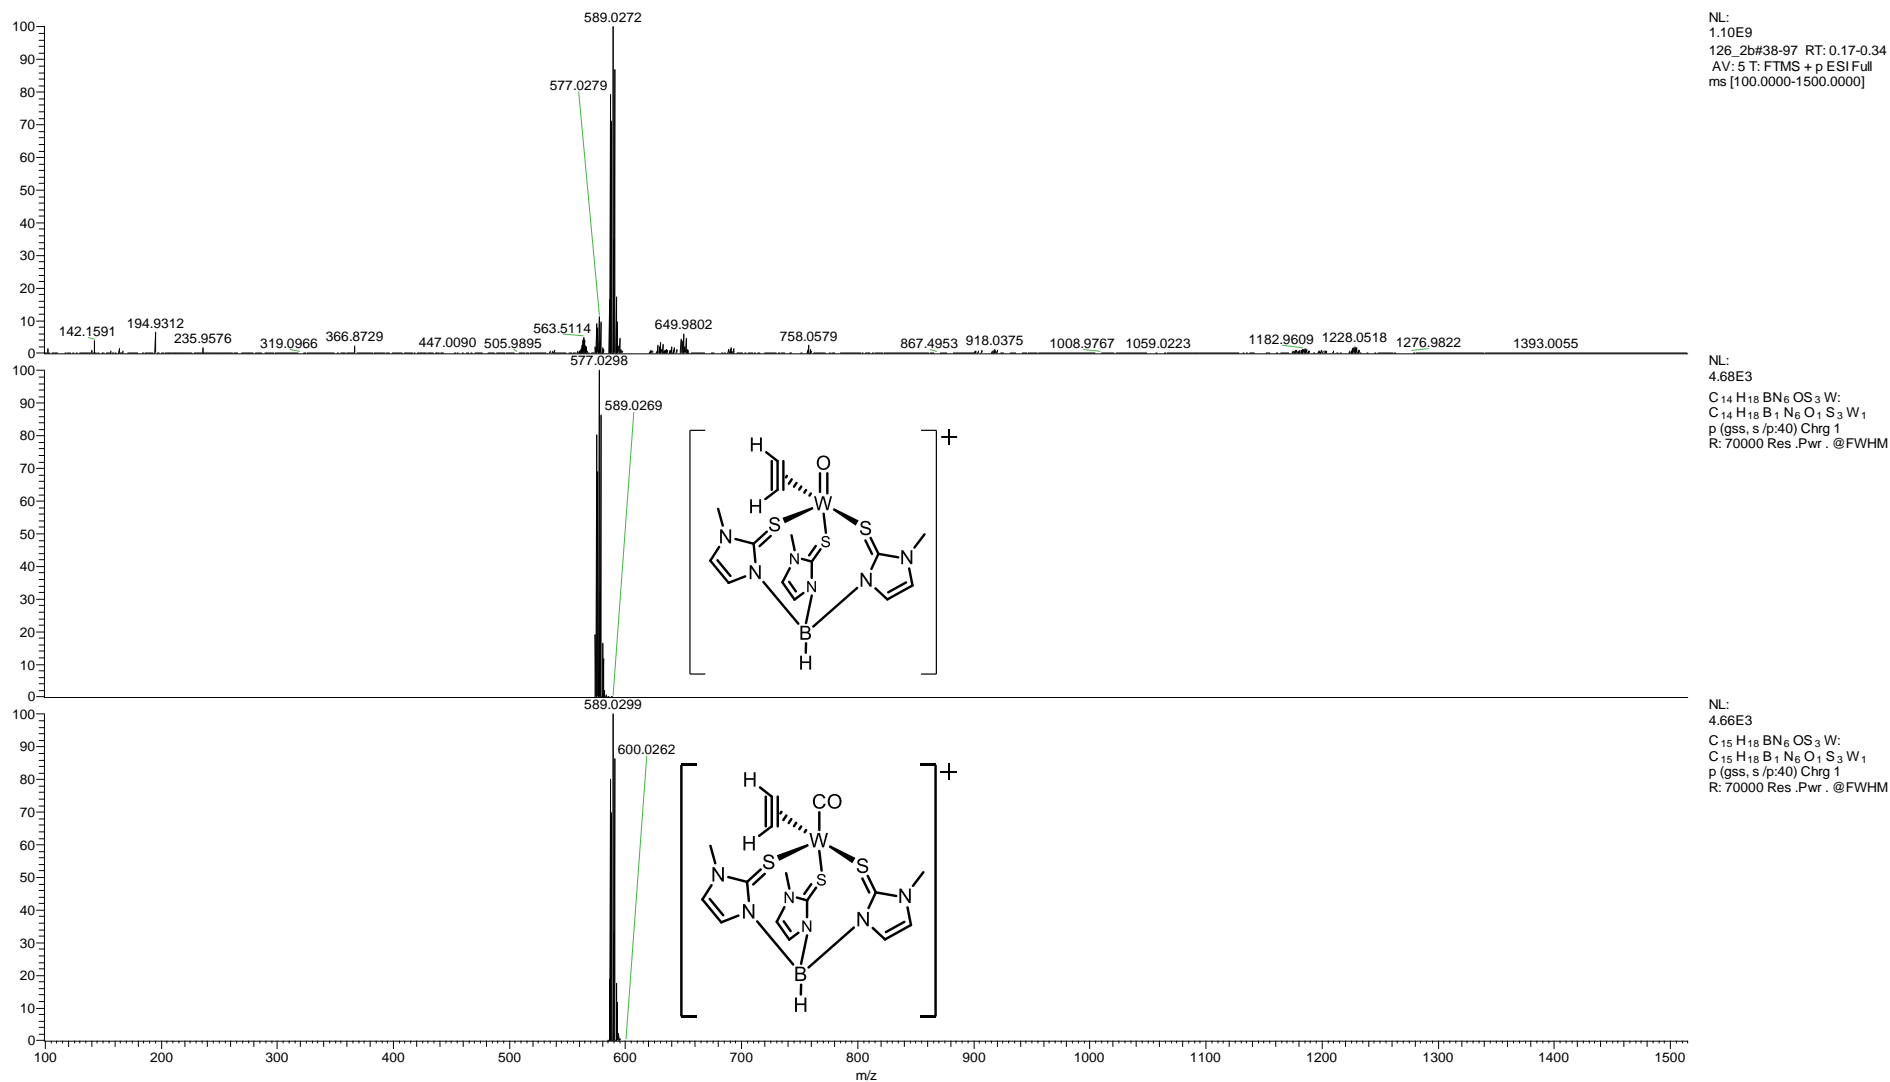

**Figure S63:** High-resolution mass spectrum of  $[\text{WS}(\text{C}_2\text{H}_2)(\text{MeCN})(\text{Tm}^{\text{Me}})](\text{OTf})$  (**14**) and the calculated masses of various fragments.

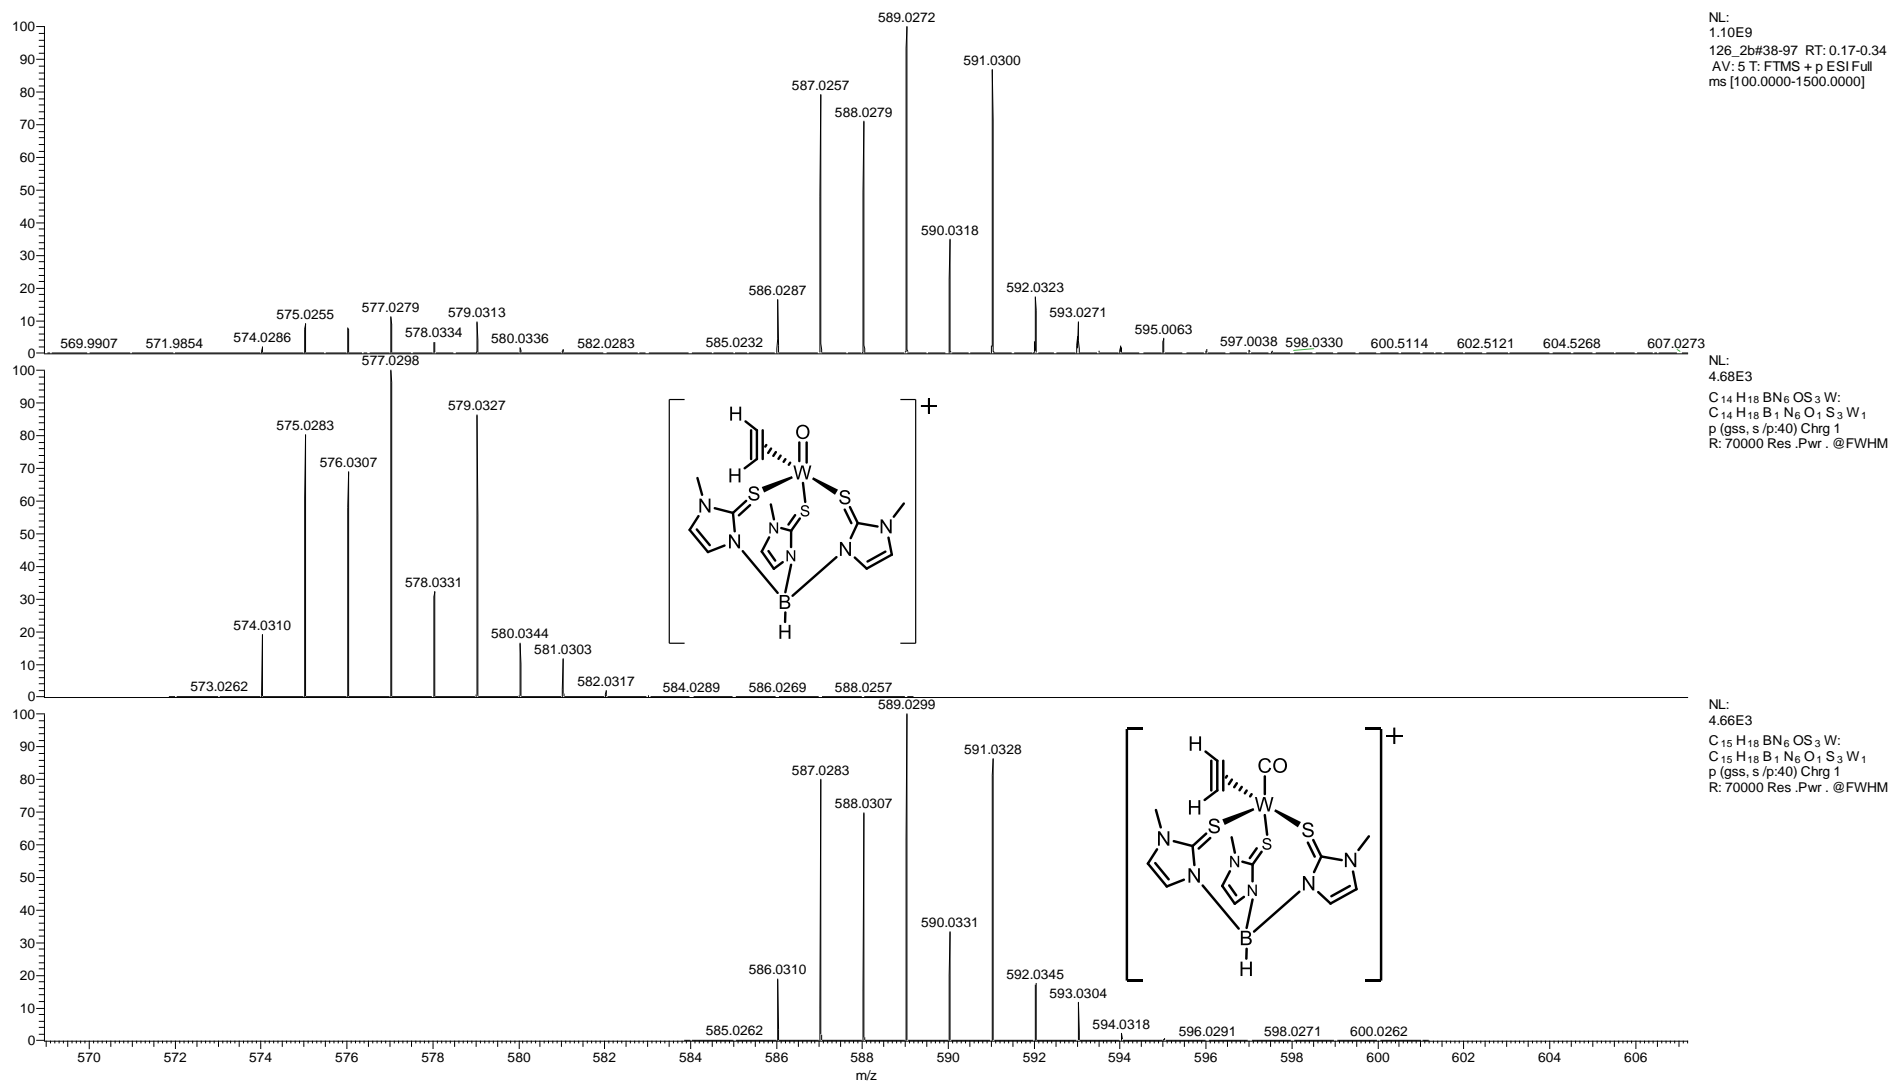

**Figure S64:** Zoomed in high-resolution mass spectrum of  $[\text{WS}(\text{C}_2\text{H}_2)(\text{MeCN})(\text{Tm}^{\text{Me}})](\text{OTf})$  (**14**) showing the peak for the  $[\text{WO}(\text{C}_2\text{H}_2)(\text{Tm}^{\text{Me}})]^+$  and the  $[\text{W}(\text{CO})(\text{C}_2\text{H}_2)(\text{Tm}^{\text{Me}})]^+$  ion and their calculated mass (middle and bottom).



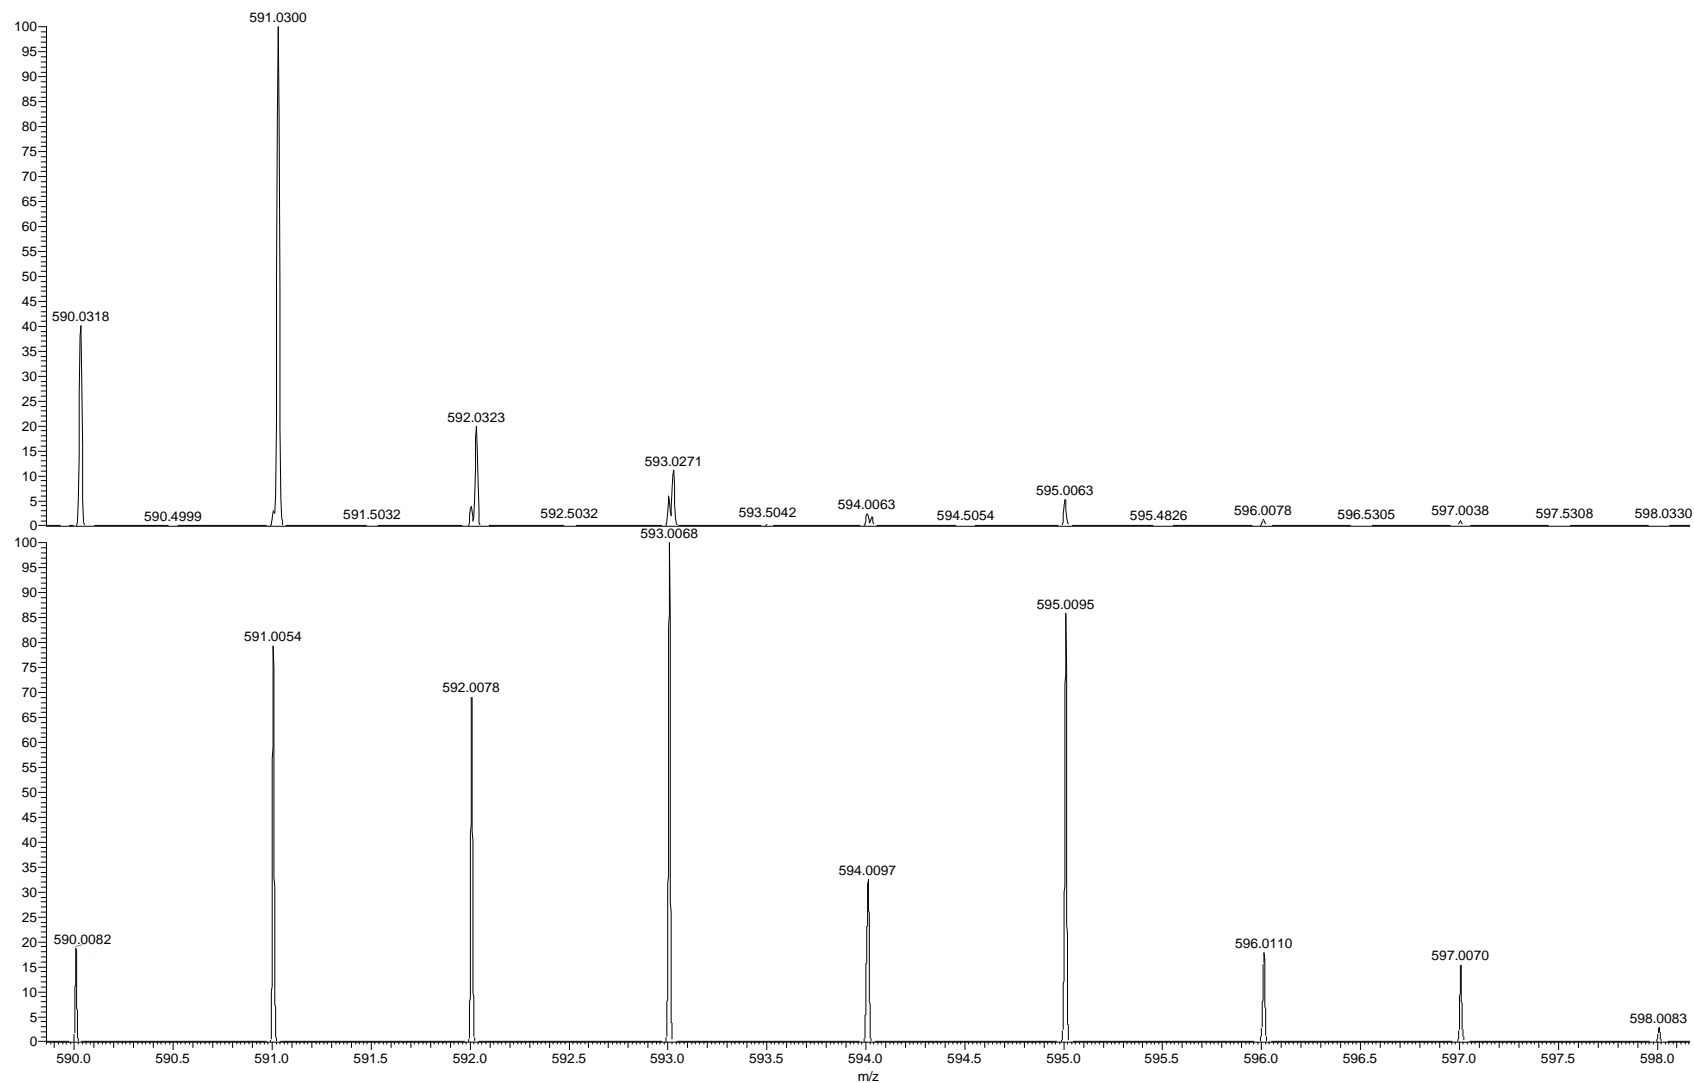

NL:  
9.59E8  
126\_2b#38-97 RT: 0.17-0.34  
AV: 5 T: FTMS + p ESI Full  
ms [100.0000-1500.0000]

NL:  
4.53E3  
C<sub>14</sub>H<sub>18</sub>BN<sub>6</sub>S<sub>4</sub>W:  
C<sub>14</sub>H<sub>18</sub>B<sub>1</sub>N<sub>6</sub>S<sub>4</sub>W<sub>1</sub>  
p (gss, s (p=40) Chrg 1  
R: 70000 Res. Pwr. @FWHM

**Figure S65:** Zoomed in high-resolution mass spectrum of  $[\text{WS}(\text{C}_2\text{H}_2)(\text{MeCN})(\text{Tm}^{\text{Me}})](\text{OTf})$  (**14**) showing the peak for the  $[\text{WS}(\text{C}_2\text{H}_2)(\text{Tm}^{\text{Me}})]^+$  ion overlapping with the  $[\text{W}(\text{CO})(\text{C}_2\text{H}_2)(\text{Tm}^{\text{Me}})]^+$  ion (top) and its calculated mass (bottom).

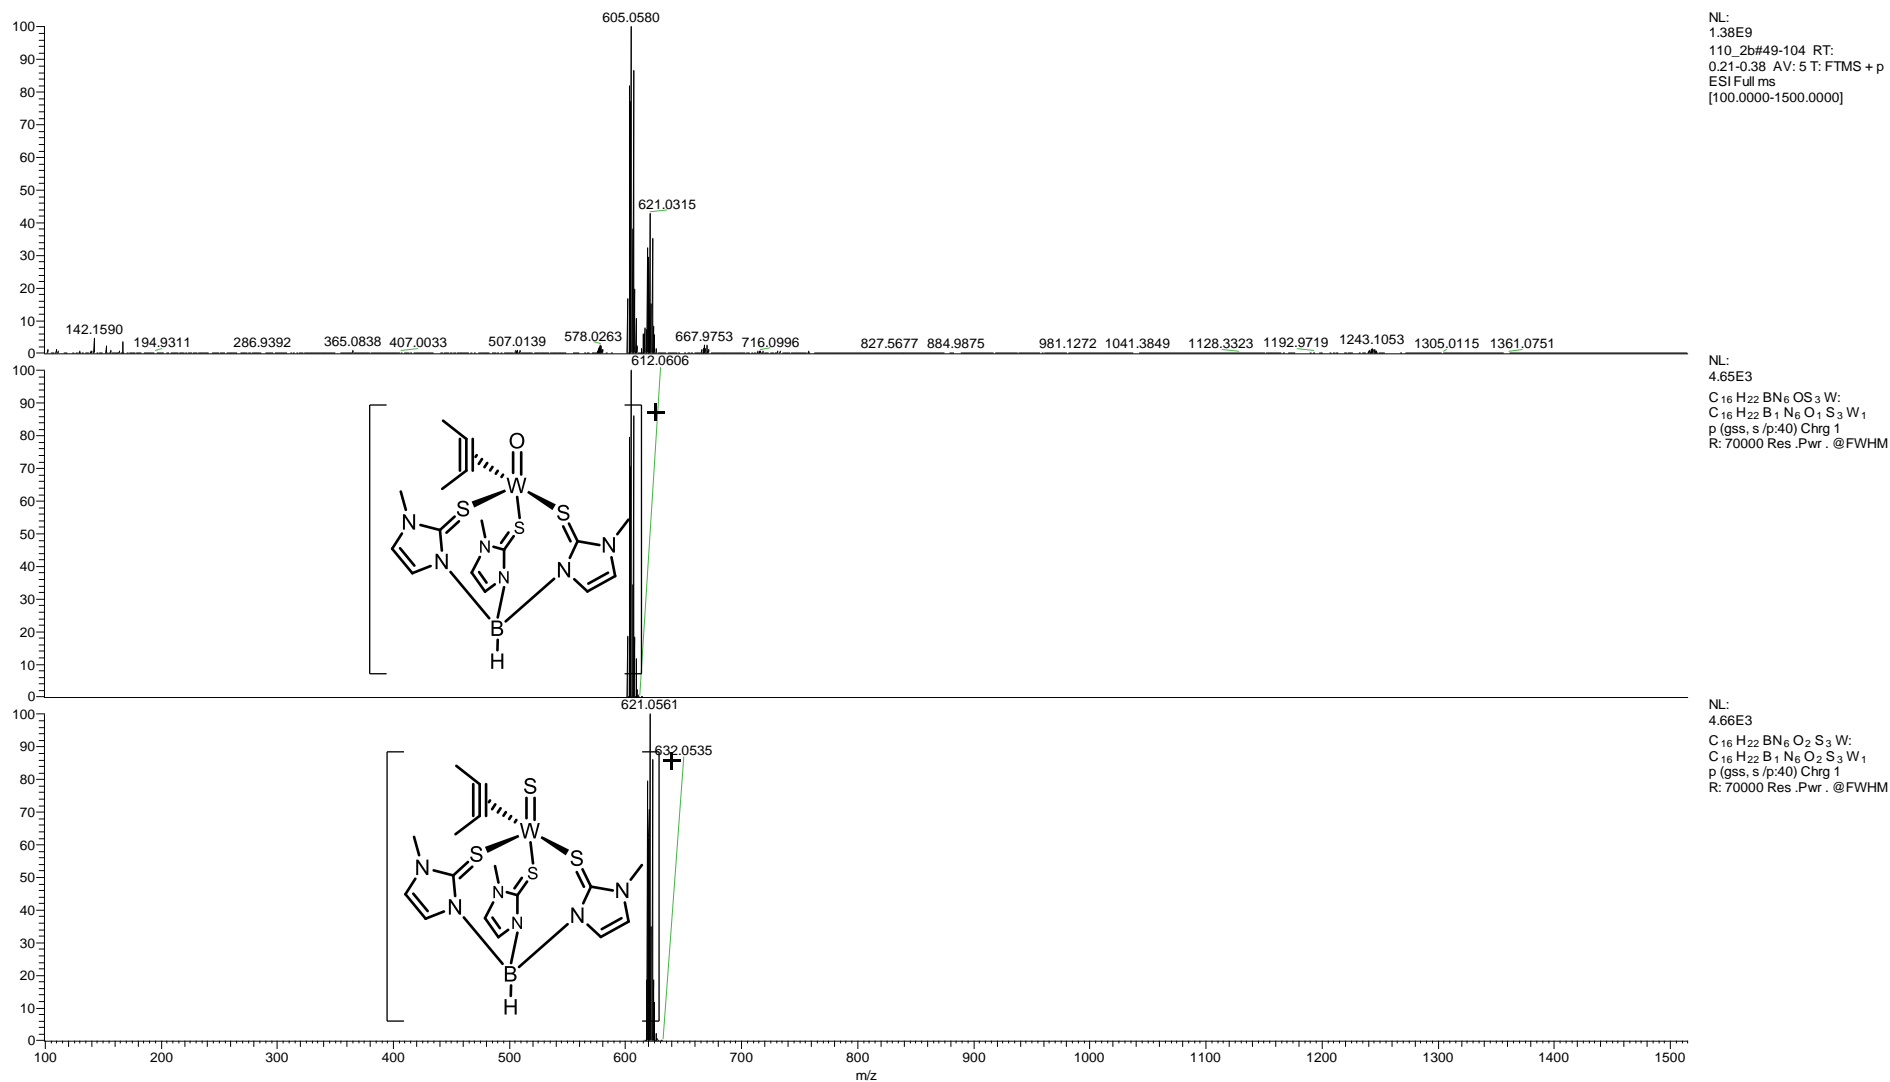

Figure S66: High-resolution mass spectrum of  $[WS(C_2Me_2)(MeCN)(Tm^{Me})](OTf)$  (**15**) and the calculated masses of various fragments.

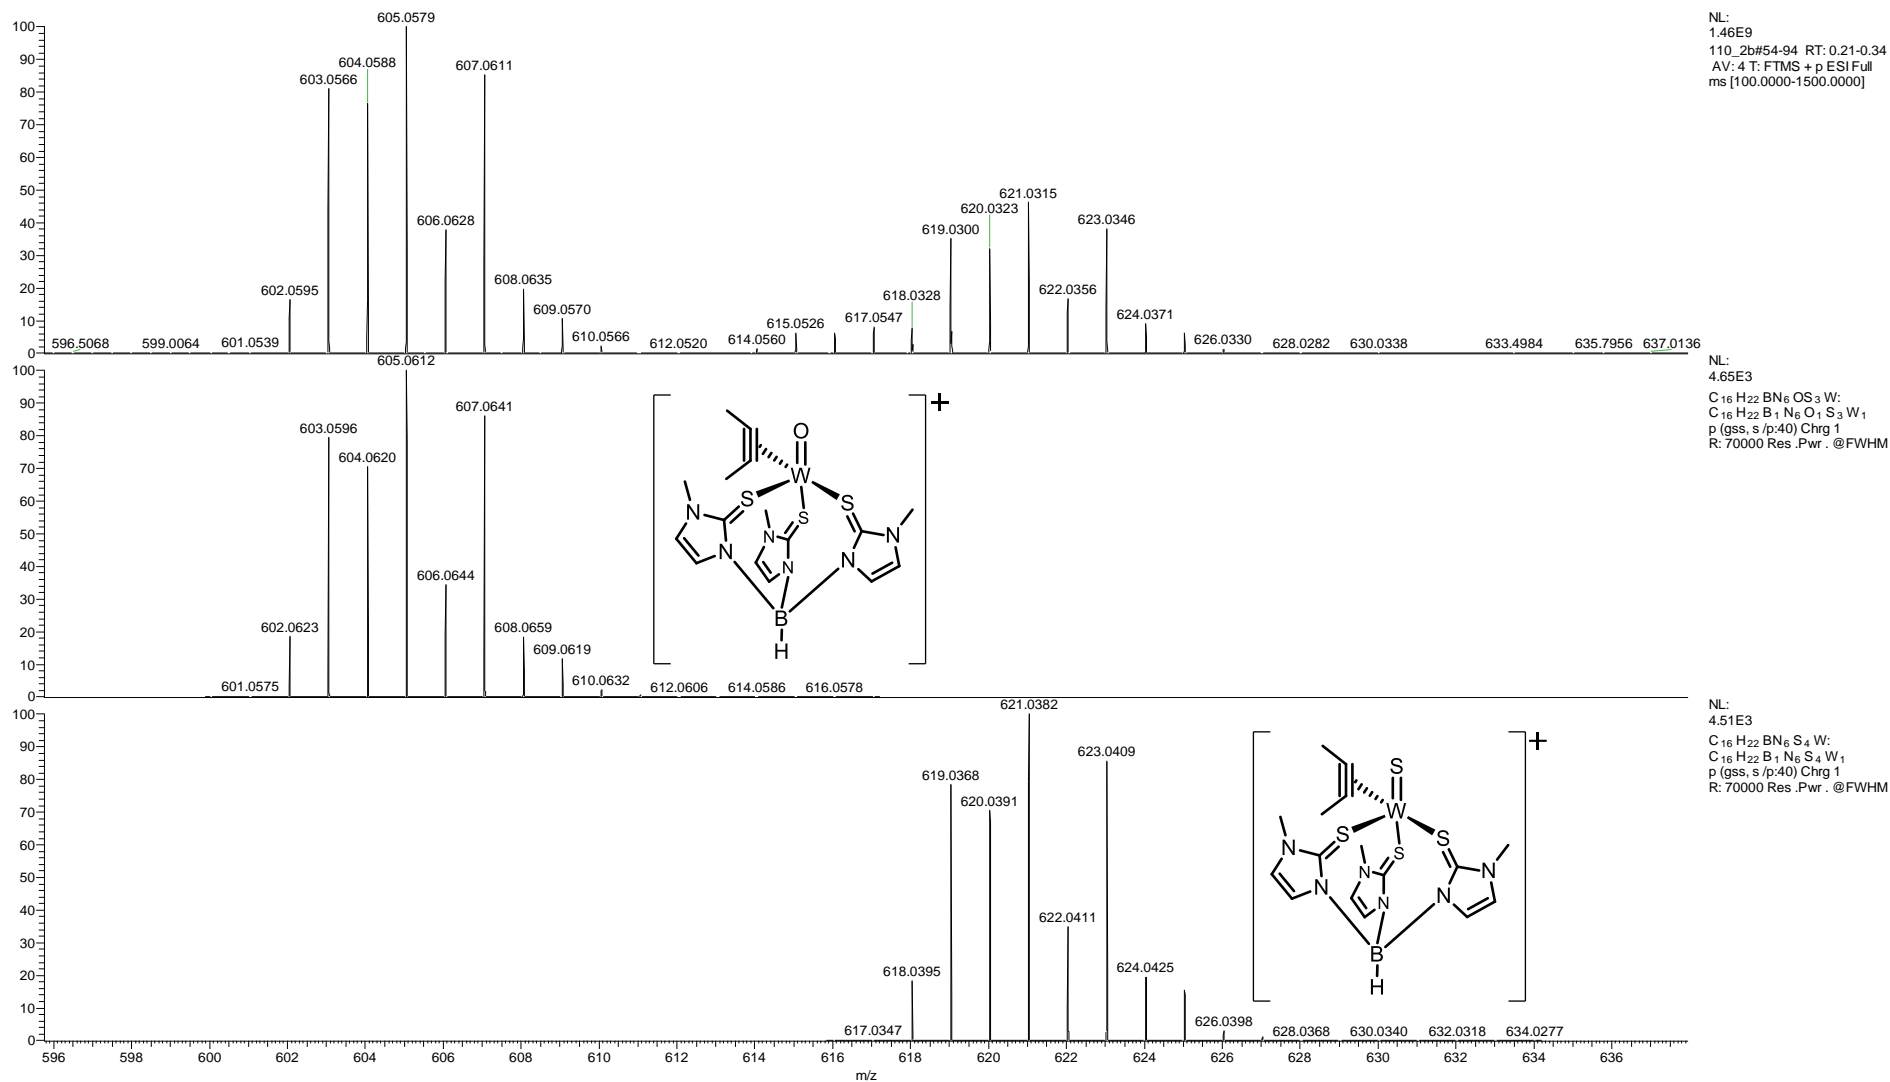

**Figure S67:** Zoomed in high-resolution mass spectrum of  $[WS(C_2Me_2)(MeCN)(Tm^{Me})](OTf)$  (**15**) showing the peak for the  $[WO(C_2Me_2)(Tm^{Me})]^+$  and  $[WS(C_2Me_2)(Tm^{Me})]^+$  ion (top) and their calculated masses (middle and bottom).

## 4 CRYSTAL STRUCTURE DETERMINATIONS

---

**General.** All the single crystal measurements were performed on a Bruker APEX-II CCD diffractometer at 100 K using Mo  $K_{\alpha}$  radiation with a wavelength of 0.71073 Å from an Incoatec microfocus sealed tube equipped with a multilayer monochromator. Absorption corrections were made semi-empirically from equivalents. The structures were solved by direct methods (SHELXS-97)<sup>4</sup> and refined by full-matrix least-squares techniques against  $F^2$  (SHELXL-2014/6)<sup>5</sup>. A weighting scheme of  $w = 1/[\sigma^2(F_o^2) + (aP)^2 + bP]$  where  $P = (F_o^2 + 2F_c^2)/3$  was used. The non-hydrogen atoms were refined with anisotropic displacement parameters without any constraints except for some complexes given below or for solvent molecules or triflate anions. The positions of the H atoms bonded to boron as well as those of the acetylene ligands were taken from difference Fourier maps, the C–H distances of the acetylene ligands were fixed to 0.95 Å, and these H atoms were refined with individual isotropic displacement parameters without any constraints to the bond angles. The H atoms of the aromatic rings were put at the external bisectors of the X–C–C angles at C–H distances of 0.95 Å and common isotropic displacement parameters were refined for the H atoms of the same ring. The H atoms of the CH<sub>2</sub> groups were refined with common isotropic displacement parameters for the H atoms of the same group and idealized geometry with approximately tetrahedral angles and C–H distances of 0.99 Å. The H atoms of the methyl groups and *tert*-butyl groups were refined with common isotropic displacement parameters for the H atoms of the same group and idealized geometries with tetrahedral angles, enabling rotation around the C–C bonds, and C–H distances of 0.98 Å. Crystal data, data collection parameters and structure refinement details are given in Tables S2-S7. Further refinement information, structure and bonding parameters, SHELXL .res and .hkl files are given in the deposited CIF file which is available free of charge from The Cambridge Crystallographic Data Centre (CCDC XXXXXX-XXXXXX).

**Crystal structure determination of 1:** The bromido ligand and the carbonyl ligand are disordered over two orientations and were refined with site occupation factors of 0.900(2) and 0.100(2), respectively. The same anisotropic displacement parameters were refined for atoms closer than 1.1 Å in the disordered part, and the equivalent bonds were restrained to have the same lengths.

**Crystal structure determination of 3:** The borato ligand was disordered over two orientations and refined with site occupation factors of 0.548(6) and 0.452(6), respectively. The equivalent bonds in this disordered ligand were restrained to have the same lengths and the same anisotropic displacement parameters were used for equivalent atoms. The imidazole rings were refined as rigid groups. The equivalent W–S bonds to the disordered ligand were restrained to have the same lengths. One of the phenyl rings was disordered, too. The C atoms of the phenyl ring in the less occupied orientation [0.193(8)] were fitted to a regular hexagon with C–C distances of 1.39 Å. The bonds to the phenyl rings were restrained to have the same lengths.

**Crystal structure determination of 6:** The bromo, acetylene and sulfido ligands and concomitantly the central W atom were disordered over two orientations which refined to site occupation factors of 0.8488(15) and 0.1512(15), respectively. For these disordered atoms the same anisotropic displacement parameters were used for atoms whose positions are close together and the equivalent bonds were restrained to have the same lengths. The other non-

hydrogen atoms of the metal complex were refined with anisotropic displacement parameters without any constraints. Since the H atoms of the acetylene ligands could not be refined without any constraints due to disorder, they were put at the external bisectors of the C–C–W angles at C–H distances of 0.95 Å and one common isotropic displacement parameter was refined for these H atoms.

**Crystal structure determination of 8:** For the H atoms bonded to boron which were included at calculated positions with all N–B–H angles equal at B–H distances of 1.17 Å individual isotropic displacement parameters were refined.

**Crystal structure determination of  $[\text{WCl}_3(\text{Tm}^{\text{Me}})]$ :** Since racemic twinning was detected, a scale factor between the two components was refined to a value of 0.505(7). Applying the twin matrix (-1 0 0 / 0 -1 0 / 0 0 -1) lowered the R-factor R1 from 0.0480 to 0.0320 by only one additional parameter. The absolute structure was arbitrarily assigned to one of the chiral molecules of the racemate.

**Crystal structure determinations of  $[\text{WCl}_3(\text{Tm}^{\text{Me}})] \cdot 3 \text{CDCl}_3$  and  $[\text{W}(\text{CO})(\text{C}_2\text{Ph}_2)_2(\text{MeCN})\text{Br}_2]$ :** The absolute configuration was established by anomalous dispersion effects in the diffraction measurements on the crystal.

**Crystal structure determination  $[\text{W}(\text{CO})(\text{C}_2\text{Ph}_2)_2(\text{MeCN})\text{Br}_2]$ :** The non-hydrogen atoms were refined with anisotropic displacement parameters. Due to the pseudo-symmetry between the two molecules of the asymmetric unit the same anisotropic displacement parameters were used for the atoms of the CO ligands and for those of the acetonitrile ligands as well as for some atoms of the acetylene ligands.

**Table S2:** Crystallographic data and structure refinement details of **1–2**.

| Crystal data                      | [W(CO)(C <sub>2</sub> H <sub>2</sub> )(Tm <sup>Me</sup> )Br] (1)                                       | [W(CO)(C <sub>2</sub> H <sub>2</sub> )(Tm <sup>Me</sup> )Br] (1')                                      | [W(CO)(C <sub>2</sub> Me <sub>2</sub> )(Tm <sup>Me</sup> )Br] (2)                                                                          |
|-----------------------------------|--------------------------------------------------------------------------------------------------------|--------------------------------------------------------------------------------------------------------|--------------------------------------------------------------------------------------------------------------------------------------------|
| CIF data code                     | CV42B                                                                                                  | CV42N                                                                                                  | CV201                                                                                                                                      |
| Empirical formula                 | C <sub>15</sub> H <sub>18</sub> BBrN <sub>6</sub> OS <sub>3</sub> W · 2CH <sub>2</sub> Cl <sub>2</sub> | C <sub>15</sub> H <sub>18</sub> BBrN <sub>6</sub> OS <sub>3</sub> W · 2C <sub>2</sub> H <sub>3</sub> N | 8C <sub>17</sub> H <sub>22</sub> BBrN <sub>6</sub> OS <sub>3</sub> W · 16CH <sub>2</sub> Cl <sub>2</sub> · 3C <sub>7</sub> H <sub>16</sub> |
| Formula weight                    | 838.95                                                                                                 | 751.21                                                                                                 | 7236.64                                                                                                                                    |
| Crystal description               | needle, green                                                                                          | block, blue                                                                                            | plate, blue                                                                                                                                |
| Crystal size                      | 0.23 × 0.12 × 0.05mm                                                                                   | 0.24 × 0.11 × 0.10mm                                                                                   | 0.28 × 0.27 × 0.13mm                                                                                                                       |
| Crystal system                    | monoclinic                                                                                             | triclinic                                                                                              | tetragonal                                                                                                                                 |
| Space group                       | P 2 <sub>1</sub> /c                                                                                    | P -1                                                                                                   | P 4/n                                                                                                                                      |
| a                                 | 9.6972(11)Å                                                                                            | 10.3862(4)Å                                                                                            | 24.8216(6)Å                                                                                                                                |
| b                                 | 16.0343(13)Å                                                                                           | 11.7353(5)Å                                                                                            |                                                                                                                                            |
| c                                 | 17.7938(7)Å                                                                                            | 12.4831(5)Å                                                                                            | 10.9795(3)Å                                                                                                                                |
| α                                 |                                                                                                        | 96.2205(19)°                                                                                           |                                                                                                                                            |
| β                                 | 93.325(3)°                                                                                             | 108.4188(16)°                                                                                          |                                                                                                                                            |
| γ                                 |                                                                                                        | 109.6561(17)°                                                                                          |                                                                                                                                            |
| Volume                            | 2762.1(4)Å <sup>3</sup>                                                                                | 1319.63(9)Å <sup>3</sup>                                                                               | 6764.6(4)Å <sup>3</sup>                                                                                                                    |
| Z                                 | 4                                                                                                      | 2                                                                                                      | 1                                                                                                                                          |
| Calc. density                     | 2.018Mg/m <sup>3</sup>                                                                                 | 1.891Mg/m <sup>3</sup>                                                                                 | 1.776Mg/m <sup>3</sup>                                                                                                                     |
| F(000)                            | 1616                                                                                                   | 728                                                                                                    | 3534                                                                                                                                       |
| Linear absorption coefficient μ   | 6.267mm <sup>-1</sup>                                                                                  | 6.157mm <sup>-1</sup>                                                                                  | 5.125mm <sup>-1</sup>                                                                                                                      |
| Max. and min. transmission        | 1.000 and 0.610                                                                                        | 1.000 and 0.772                                                                                        | 1.000 and 0.561                                                                                                                            |
| Unit cell determination           | 2.46° < Θ < 25.65°                                                                                     | 2.66° < Θ < 40.76°                                                                                     | 2.48° < Θ < 30.60°                                                                                                                         |
| Reflections used at 100K          | 6986                                                                                                   | 9967                                                                                                   | 9817                                                                                                                                       |
| <b>Data collection</b>            |                                                                                                        |                                                                                                        |                                                                                                                                            |
| Θ range for data collection       | 2.46 to 25.70°                                                                                         | 2.25 to 35.00°                                                                                         | 2.48 to 30.00°                                                                                                                             |
| Reflections collected/unique      | 17989 / 5238                                                                                           | 30792 / 11605                                                                                          | 65451 / 9861                                                                                                                               |
| Significant unique reflections    | 4253 with I > 2σ(I)                                                                                    | 10628 with I > 2σ(I)                                                                                   | 6396 with I > 2σ(I)                                                                                                                        |
| R(int), R(sigma)                  | 0.0569, 0.0536                                                                                         | 0.0311, 0.0375                                                                                         | 0.0665, 0.0781                                                                                                                             |
| Completeness to Θ <sub>max</sub>  | 99.8%                                                                                                  | 99.9%                                                                                                  | 99.9%                                                                                                                                      |
| <b>Refinement</b>                 |                                                                                                        |                                                                                                        |                                                                                                                                            |
| Data/ parameters/ restraints      | 5238 / 328 / 7                                                                                         | 11605 / 331 / 3                                                                                        | 9861 / 402 / 23                                                                                                                            |
| Goodness-of-fit on F <sup>2</sup> | 1.087                                                                                                  | 1.093                                                                                                  | 1.031                                                                                                                                      |
| Final R indices [I > 2σ(I)]       | R1 = 0.0416, wR2 = 0.1085                                                                              | R1 = 0.0228, wR2 = 0.0508                                                                              | R1 = 0.0421, wR2 = 0.0968                                                                                                                  |
| R indices (all data)              | R1 = 0.0550, wR2 = 0.1126                                                                              | R1 = 0.0277, wR2 = 0.0523                                                                              | R1 = 0.0861, wR2 = 0.1118                                                                                                                  |
| Weighting scheme param. a, b      | 0.0636, 1.4275                                                                                         | 0.0047, 1.5758                                                                                         | 0.0440, 0.7237                                                                                                                             |
| Largest Δ/σ in last cycle         | 0.002                                                                                                  | 0.002                                                                                                  | 0.003                                                                                                                                      |
| Largest diff. peak and hole       | 2.048 and -1.313e/Å <sup>3</sup>                                                                       | 1.564 and -1.200e/Å <sup>3</sup>                                                                       | 2.201 and -1.692e/Å <sup>3</sup>                                                                                                           |
| CCDC no.                          | <b>1987770</b>                                                                                         | <b>1987771</b>                                                                                         | <b>1987772</b>                                                                                                                             |

**Table S3:** Crystallographic data and structure refinement details of **3–5**.

| Crystal data                      | [W(CO)(C <sub>2</sub> Ph <sub>2</sub> )(Tm <sup>M<sub>e</sub></sup> )Br] (3) | [WO(C <sub>2</sub> H <sub>2</sub> )(Tm <sup>M<sub>e</sub></sup> )Br] (4)                                  | [WO(C <sub>2</sub> Me <sub>2</sub> )(Tm <sup>M<sub>e</sub></sup> )Br] (5)                              |
|-----------------------------------|------------------------------------------------------------------------------|-----------------------------------------------------------------------------------------------------------|--------------------------------------------------------------------------------------------------------|
| CIF data code                     | CV5                                                                          | CV16                                                                                                      | CV21                                                                                                   |
| Empirical formula                 | C <sub>27</sub> H <sub>26</sub> BBrN <sub>6</sub> OS <sub>3</sub> W          | C <sub>14</sub> H <sub>18</sub> BBrN <sub>6</sub> OS <sub>3</sub> W · 1.25CH <sub>2</sub> Cl <sub>2</sub> | C <sub>16</sub> H <sub>22</sub> BBrN <sub>6</sub> OS <sub>3</sub> W · 2CH <sub>2</sub> Cl <sub>2</sub> |
| Formula weight                    | 821.29                                                                       | 763.25                                                                                                    | 855.00                                                                                                 |
| Crystal description               | block, blue                                                                  | plate, yellow                                                                                             | plate, yellow                                                                                          |
| Crystal size                      | 0.20 x 0.17 x 0.13mm                                                         | 0.27 x 0.25 x 0.07mm                                                                                      | 0.25 x 0.20 x 0.07mm                                                                                   |
| Crystal system                    | monoclinic                                                                   | triclinic                                                                                                 | monoclinic                                                                                             |
| Space group                       | P 2 <sub>1</sub> /c                                                          | P -1                                                                                                      | C 2/c                                                                                                  |
| a                                 | 18.3284(4)Å                                                                  | 13.0139(5)Å                                                                                               | 31.2959(15)Å                                                                                           |
| b                                 | 9.8286(2)Å                                                                   | 13.7281(6)Å                                                                                               | 11.7023(7)Å                                                                                            |
| c                                 | 19.4451(4)Å                                                                  | 15.8785(7)Å                                                                                               | 18.1517(9)Å                                                                                            |
| α                                 |                                                                              | 71.467(2)°                                                                                                |                                                                                                        |
| β                                 | 99.9363(12)°                                                                 | 77.5417(18)°                                                                                              | 113.829(2)°                                                                                            |
| γ                                 |                                                                              | 89.064(2)°                                                                                                |                                                                                                        |
| Volume                            | 3450.35(13)Å <sup>3</sup>                                                    | 2622.16(19)Å <sup>3</sup>                                                                                 | 6081.1(6)Å <sup>3</sup>                                                                                |
| Z                                 | 4                                                                            | 4                                                                                                         | 8                                                                                                      |
| Calc. density                     | 1.581Mg/m <sup>3</sup>                                                       | 1.933Mg/m <sup>3</sup>                                                                                    | 1.868Mg/m <sup>3</sup>                                                                                 |
| F(000)                            | 1600                                                                         | 1466                                                                                                      | 3312                                                                                                   |
| Linear absorption coefficient μ   | 4.716mm <sup>-1</sup>                                                        | 6.443mm <sup>-1</sup>                                                                                     | 5.695mm <sup>-1</sup>                                                                                  |
| Max. and min. transmission        | 0.746 and 0.490                                                              | 1.000 and 0.382                                                                                           | 1.000 and 0.673                                                                                        |
| Unit cell determination           | 2.67° < Θ < 30.63°                                                           | 2.40° < Θ < 35.80°                                                                                        | 2.45° < Θ < 28.49°                                                                                     |
| Reflections used at 100K          | 9951                                                                         | 9869                                                                                                      | 8302                                                                                                   |
| <b>Data collection</b>            |                                                                              |                                                                                                           |                                                                                                        |
| Θ range for data collection       | 2.33 to 26.00°                                                               | 2.18 to 30.00°                                                                                            | 1.88 to 28.00°                                                                                         |
| Reflections collected/ unique     | 26479 / 6758                                                                 | 42943 / 15292                                                                                             | 26989 / 7342                                                                                           |
| Significant unique reflections    | 5457 with I > 2σ(I)                                                          | 10492 with I > 2σ(I)                                                                                      | 5380 with I > 2σ(I)                                                                                    |
| R(int), R(sigma)                  | 0.0416, 0.0536                                                               | 0.0618, 0.1137                                                                                            | 0.0447, 0.0606                                                                                         |
| Completeness to Θ <sub>max</sub>  | 99.9%                                                                        | 99.9%                                                                                                     | 99.9%                                                                                                  |
| <b>Refinement</b>                 |                                                                              |                                                                                                           |                                                                                                        |
| Data/ parameters/ restraints      | 6758 / 400 / 69                                                              | 15292 / 600 / 4                                                                                           | 7342 / 354 / 8                                                                                         |
| Goodness-of-fit on F <sup>2</sup> | 1.082                                                                        | 1.034                                                                                                     | 1.036                                                                                                  |
| Final R indices [I > 2σ(I)]       | R1 = 0.0381,<br>wR2 = 0.1065                                                 | R1 = 0.0584,<br>wR2 = 0.1434                                                                              | R1 = 0.0407,<br>wR2 = 0.0923                                                                           |
| R indices (all data)              | R1 = 0.0499,<br>wR2 = 0.1118                                                 | R1 = 0.0931,<br>wR2 = 0.1594                                                                              | R1 = 0.0653,<br>wR2 = 0.1002                                                                           |
| Weighting scheme param. a, b      | 0.0603, 3.7977                                                               | 0.0653, 0.5461                                                                                            | 0.0487, 1.5403                                                                                         |
| Largest Δ/σ in last cycle         | 0.001                                                                        | 0.001                                                                                                     | 0.001                                                                                                  |
| Largest diff. peak and hole       | 1.953 and -2.445e/Å <sup>3</sup>                                             | 1.898 and -2.104e/Å <sup>3</sup>                                                                          | 2.408 and -1.572e/Å <sup>3</sup>                                                                       |
| <b>CCDC no.</b>                   | <b>1987773</b>                                                               | <b>1987774</b>                                                                                            | <b>1987775</b>                                                                                         |

**Table S4:** Crystallographic data and structure refinement details of 6–8.

| Crystal data                      | [WS(C <sub>2</sub> H <sub>2</sub> )(Tm <sup>Me</sup> )Br] (6)                                                                                    | [WS(C <sub>2</sub> Me <sub>2</sub> )(Tm <sup>Me</sup> )Br] (7)                                        | [WO(μ-O)(C <sub>2</sub> Me <sub>2</sub> ) <sub>2</sub> (Tm <sup>Me</sup> )] <sub>2</sub> (OTf) <sub>2</sub> (8)                                                                    |
|-----------------------------------|--------------------------------------------------------------------------------------------------------------------------------------------------|-------------------------------------------------------------------------------------------------------|------------------------------------------------------------------------------------------------------------------------------------------------------------------------------------|
| CIF data code                     | CV45B                                                                                                                                            | CV27C                                                                                                 | CV114                                                                                                                                                                              |
| Empirical formula                 | C <sub>14</sub> H <sub>18</sub> BBrN <sub>6</sub> S <sub>4</sub> W · 1.604C <sub>4</sub> H <sub>8</sub> O · 0.396CH <sub>2</sub> Cl <sub>2</sub> | C <sub>16</sub> H <sub>22</sub> BBrN <sub>6</sub> S <sub>4</sub> W · 2CH <sub>2</sub> Cl <sub>2</sub> | C <sub>32</sub> H <sub>44</sub> B <sub>2</sub> N <sub>12</sub> O <sub>2</sub> S <sub>6</sub> W <sub>2</sub> · 2CF <sub>3</sub> O <sub>3</sub> S · 2CH <sub>2</sub> Cl <sub>2</sub> |
| Formula weight                    | 822.41                                                                                                                                           | 871.06                                                                                                | 1678.46                                                                                                                                                                            |
| Crystal description               | block, yellow                                                                                                                                    | plate, orange                                                                                         | plate, yellow                                                                                                                                                                      |
| Crystal size                      | 0.26 x 0.14 x 0.13mm                                                                                                                             | 0.07 x 0.07 x 0.02mm                                                                                  | 0.18 x 0.13 x 0.03mm                                                                                                                                                               |
| Crystal system                    | monoclinic                                                                                                                                       | monoclinic                                                                                            | triclinic                                                                                                                                                                          |
| Space group                       | P 2 <sub>1</sub> /n                                                                                                                              | P 2 <sub>1</sub> /c                                                                                   | P -1                                                                                                                                                                               |
| a                                 | 9.4289(4)Å                                                                                                                                       | 16.298(3)Å                                                                                            | 13.188(5)Å                                                                                                                                                                         |
| b                                 | 17.4562(8)Å                                                                                                                                      | 14.323(3)Å                                                                                            | 15.003(6)Å                                                                                                                                                                         |
| c                                 | 17.5522(8)Å                                                                                                                                      | 13.118(2)Å                                                                                            | 16.238(6)Å                                                                                                                                                                         |
| α                                 |                                                                                                                                                  |                                                                                                       | 83.664(4)°                                                                                                                                                                         |
| β                                 | 94.9845(19)°                                                                                                                                     | 104.151(9)°                                                                                           | 87.934(3)°                                                                                                                                                                         |
| γ                                 |                                                                                                                                                  |                                                                                                       | 68.163(3)°                                                                                                                                                                         |
| Volume                            | 2878.0(2)Å <sup>3</sup>                                                                                                                          | 2969.3(10)Å <sup>3</sup>                                                                              | 2963.9(19)Å <sup>3</sup>                                                                                                                                                           |
| Z                                 | 4                                                                                                                                                | 4                                                                                                     | 2                                                                                                                                                                                  |
| Calc. density                     | 1.898Mg/m <sup>3</sup>                                                                                                                           | 1.949Mg/m <sup>3</sup>                                                                                | 1.881Mg/m <sup>3</sup>                                                                                                                                                             |
| F(000)                            | 1611.2                                                                                                                                           | 1688                                                                                                  | 1640                                                                                                                                                                               |
| Linear absorption coefficient μ   | 5.796mm <sup>-1</sup>                                                                                                                            | 5.899mm <sup>-1</sup>                                                                                 | 4.415mm <sup>-1</sup>                                                                                                                                                              |
| Max. and min. transmission        | 1.000 and 0.555                                                                                                                                  | 1.000 and 0.662                                                                                       | 1.000 and 0.433                                                                                                                                                                    |
| Unit cell determination           | 2.33° < Θ < 30.69°                                                                                                                               | 2.58° < Θ < 20.19°                                                                                    | 2.52° < Θ < 27.39°                                                                                                                                                                 |
| Reflections used at 100K          | 9962                                                                                                                                             | 9260                                                                                                  | 9979                                                                                                                                                                               |
| <b>Data collection</b>            |                                                                                                                                                  |                                                                                                       |                                                                                                                                                                                    |
| Θ range for data collection       | 2.33 to 30.00°                                                                                                                                   | 1.92 to 26.00°                                                                                        | 1.76 to 27.00°                                                                                                                                                                     |
| Reflections collected/unique      | 28792 / 8384                                                                                                                                     | 17760 / 5829                                                                                          | 34360 / 12924                                                                                                                                                                      |
| Significant unique reflections    | 6601 with I > 2σ(I)                                                                                                                              | 4460 with I > 2σ(I)                                                                                   | 9403 with I > 2σ(I)                                                                                                                                                                |
| R(int), R(sigma)                  | 0.0431, 0.0560                                                                                                                                   | 0.0384, 0.0660                                                                                        | 0.0810, 0.1018                                                                                                                                                                     |
| Completeness to Θ <sub>max</sub>  | 100.0%                                                                                                                                           | 100.0%                                                                                                | 99.9%                                                                                                                                                                              |
| <b>Refinement</b>                 |                                                                                                                                                  |                                                                                                       |                                                                                                                                                                                    |
| Data/ parameters/ restraints      | 8384 / 374 / 43                                                                                                                                  | 5829 / 335 / 1                                                                                        | 12924 / 732 / 13                                                                                                                                                                   |
| Goodness-of-fit on F <sup>2</sup> | 1.037                                                                                                                                            | 1.066                                                                                                 | 1.087                                                                                                                                                                              |
| Final R indices [I > 2σ(I)]       | R1 = 0.0370,<br>wR2 = 0.0869                                                                                                                     | R1 = 0.0461,<br>wR2 = 0.0988                                                                          | R1 = 0.0627,<br>wR2 = 0.1553                                                                                                                                                       |
| R indices (all data)              | R1 = 0.0542,<br>wR2 = 0.0931                                                                                                                     | R1 = 0.0642,<br>wR2 = 0.1046                                                                          | R1 = 0.0918,<br>wR2 = 0.1728                                                                                                                                                       |
| Weighting scheme param. a, b      | 0.0389, 3.7582                                                                                                                                   | 0.0462, 2.1055                                                                                        | 0.0860, 1.6840                                                                                                                                                                     |
| Largest Δ/σ in last cycle         | 0.001                                                                                                                                            | 0.002                                                                                                 | 0.001                                                                                                                                                                              |
| Largest diff. peak and hole       | 2.015 and -1.947e/Å <sup>3</sup>                                                                                                                 | 1.311 and -0.919e/Å <sup>3</sup>                                                                      | 2.018 and -1.939e/Å <sup>3</sup>                                                                                                                                                   |
| <b>CCDC no.</b>                   | <b>1987776</b>                                                                                                                                   | <b>1987777</b>                                                                                        | <b>1987778</b>                                                                                                                                                                     |



**Table S5:** Crystallographic data and structure refinement details of **9**,  $[\text{W}(\text{CO})(\text{C}_2\text{Me}_2)_2(\text{MeCN})\text{Br}_2]$  and  $[\text{W}(\text{CO})(\text{C}_2\text{Me}_2)_2(\text{MeCN})(\text{Br})_2]'$ .

| Crystal data                          | $[\text{W}_2(\mu\text{-S})_2(\text{C}_2\text{Me}_2)(\text{Tm}^{\text{Me}})_2](\text{OTf})_2$ ( <b>9</b> )                                  | $[\text{W}(\text{CO})(\text{C}_2\text{Me}_2)_2(\text{MeCN})\text{Br}_2]$ | $[\text{W}(\text{CO})(\text{C}_2\text{Me}_2)_2(\text{MeCN})\text{Br}_2]'$       |
|---------------------------------------|--------------------------------------------------------------------------------------------------------------------------------------------|--------------------------------------------------------------------------|---------------------------------------------------------------------------------|
| <b>CIF data code</b>                  | <b>CV107</b>                                                                                                                               | <b>CV19</b>                                                              | <b>LPVK3</b>                                                                    |
| Empirical formula                     | $\text{C}_{28}\text{H}_{38}\text{B}_2\text{N}_{12}\text{S}_8\text{W}_2 \cdot 2\text{CF}_3\text{O}_3\text{S} \cdot 2\text{CH}_2\text{Cl}_2$ | $\text{C}_{11}\text{H}_{15}\text{Br}_2\text{NOW}$                        | $2\text{C}_{11}\text{H}_{15}\text{Br}_2\text{NOW} \cdot \text{CH}_2\text{Cl}_2$ |
| Formula weight                        | 1656.49                                                                                                                                    | 520.91                                                                   | 1126.74                                                                         |
| Crystal description                   | plate, violet                                                                                                                              | block, green                                                             | block, colourless                                                               |
| Crystal size                          | 0.28 x 0.15 x 0.05mm                                                                                                                       | 0.24 x 0.24 x 0.17mm                                                     | 0.31 x 0.25 x 0.16mm                                                            |
| Crystal system                        | trigonal                                                                                                                                   | orthorhombic                                                             | triclinic                                                                       |
| Space group                           | R -3                                                                                                                                       | P b c a                                                                  | P -1                                                                            |
| a                                     | 38.265(3)Å                                                                                                                                 | 10.7043(4)Å                                                              | 10.5632(6)Å                                                                     |
| b                                     |                                                                                                                                            | 11.7559(5)Å                                                              | 10.7543(6)Å                                                                     |
| c                                     | 19.5669(17)Å                                                                                                                               | 23.3674(10)Å                                                             | 14.7207(9)Å                                                                     |
| $\alpha$                              |                                                                                                                                            |                                                                          | 78.5003(15)°                                                                    |
| $\beta$                               |                                                                                                                                            |                                                                          | 76.7560(13)°                                                                    |
| $\gamma$                              |                                                                                                                                            |                                                                          | 87.6914(14)°                                                                    |
| Volume                                | 24812(4)Å <sup>3</sup>                                                                                                                     | 2940.5(2)Å <sup>3</sup>                                                  | 1595.09(16)Å <sup>3</sup>                                                       |
| Z                                     | 18                                                                                                                                         | 8                                                                        | 2                                                                               |
| Calc. density                         | 1.995Mg/m <sup>3</sup>                                                                                                                     | 2.353Mg/m <sup>3</sup>                                                   | 2.346Mg/m <sup>3</sup>                                                          |
| F(000)                                | 14508                                                                                                                                      | 1920                                                                     | 1044                                                                            |
| Linear absorption coefficient $\mu$   | 4.815mm <sup>-1</sup>                                                                                                                      | 13.273mm <sup>-1</sup>                                                   | 12.406mm <sup>-1</sup>                                                          |
| Max. and min. transmission            | 1.000 and 0.528                                                                                                                            | 0.746 and 0.255                                                          | 0.746 and 0.279                                                                 |
| Unit cell determination               | 2.45° < $\Theta$ < 25.73°                                                                                                                  | 2.58° < $\Theta$ < 30.73°                                                | 2.72° < $\Theta$ < 30.32°                                                       |
| Reflections used at 100K              | 9898                                                                                                                                       | 9963                                                                     | 9970                                                                            |
| <b>Data collection</b>                |                                                                                                                                            |                                                                          |                                                                                 |
| $\Theta$ range for data collection    | 1.93 to 25.00°                                                                                                                             | 2.58 to 30.00°                                                           | 2.63 to 30.00°                                                                  |
| Reflections collected/unique          | 50028 / 9712                                                                                                                               | 23563 / 4295                                                             | 39859 / 9277                                                                    |
| Significant unique reflections        | 7454 with $I > 2\sigma(I)$                                                                                                                 | 3872 with $I > 2\sigma(I)$                                               | 6791 with $I > 2\sigma(I)$                                                      |
| R(int), R(sigma)                      | 0.1289, 0.0742                                                                                                                             | 0.0355, 0.0332                                                           | 0.0778, 0.0616                                                                  |
| Completeness to $\Theta_{\text{max}}$ | 99.9%                                                                                                                                      | 100.0%                                                                   | 99.9%                                                                           |
| <b>Refinement</b>                     |                                                                                                                                            |                                                                          |                                                                                 |
| Data/ parameters/ restraints          | 9712 / 710 / 6                                                                                                                             | 4295 / 155 / 0                                                           | 9277 / 337 / 0                                                                  |
| Goodness-of-fit on F <sup>2</sup>     | 1.025                                                                                                                                      | 1.070                                                                    | 1.041                                                                           |
| Final R indices [ $I > 2\sigma(I)$ ]  | R1 = 0.0674,<br>wR2 = 0.1641                                                                                                               | R1 = 0.0253,<br>wR2 = 0.0564                                             | R1 = 0.0354,<br>wR2 = 0.0877                                                    |
| R indices (all data)                  | R1 = 0.0828,<br>wR2 = 0.1741                                                                                                               | R1 = 0.0303,<br>wR2 = 0.0580                                             | R1 = 0.0551,<br>wR2 = 0.0965                                                    |
| Weighting scheme param. a, b          | 0.0973, 0.0000                                                                                                                             | 0.0245, 3.3615                                                           | 0.0301, 0.2860                                                                  |
| Largest $\Delta/\sigma$ in last cycle | 0.001                                                                                                                                      | 0.002                                                                    | 0.002                                                                           |
| Largest diff. peak and hole           | 2.090 and -1.264e/Å <sup>3</sup>                                                                                                           | 2.361 and -2.237e/Å <sup>3</sup>                                         | 2.275 and -2.340e/Å <sup>3</sup>                                                |
| <b>CCDC no.</b>                       | <b>1987779</b>                                                                                                                             | <b>1987780</b>                                                           | <b>1987781</b>                                                                  |

**Table S6:** Crystallographic data and structure refinement details of **[W(CO)(C<sub>2</sub>Ph<sub>2</sub>)<sub>2</sub>(MeCN)Br<sub>2</sub>]**, **[W(CO)(C<sub>2</sub>Ph<sub>2</sub>)<sub>2</sub>(MeCN)Br<sub>2</sub>]**' and **[WCl<sub>3</sub>Tm<sup>Me</sup>]**.

| Crystal data                      | [W(CO)(C <sub>2</sub> Ph <sub>2</sub> ) <sub>2</sub> (MeCN)Br <sub>2</sub> ] | [W(CO)(C <sub>2</sub> Ph <sub>2</sub> ) <sub>2</sub> (MeCN)Br <sub>2</sub> ]'         | [WCl <sub>3</sub> (Tm <sup>Me</sup> )]                                                                |
|-----------------------------------|------------------------------------------------------------------------------|---------------------------------------------------------------------------------------|-------------------------------------------------------------------------------------------------------|
| CIF data code                     | LP271G                                                                       | LP138                                                                                 | CVMB3                                                                                                 |
| Empirical formula                 | C <sub>31</sub> H <sub>23</sub> Br <sub>2</sub> NOW                          | C <sub>31</sub> H <sub>23</sub> Br <sub>2</sub> NOW · CH <sub>2</sub> Cl <sub>2</sub> | C <sub>12</sub> H <sub>16</sub> BCl <sub>3</sub> N <sub>6</sub> S <sub>3</sub> W · 2CHCl <sub>3</sub> |
| Formula weight                    | 769.17                                                                       | 854.10                                                                                | 880.23                                                                                                |
| Crystal description               | block, yellow                                                                | block, yellow                                                                         | needle, red                                                                                           |
| Crystal size                      | 0.26 x 0.26 x 0.24mm                                                         | 0.26 x 0.24 x 0.21mm                                                                  | 0.27 x 0.12 x 0.10mm                                                                                  |
| Crystal system                    | orthorhombic                                                                 | monoclinic                                                                            | orthorhombic                                                                                          |
| Space group                       | F d d 2                                                                      | P 2 <sub>1</sub> /n                                                                   | P 2 <sub>1</sub> 2 <sub>1</sub> 2 <sub>1</sub>                                                        |
| a                                 | 31.6962(9)Å                                                                  | 10.0599(16)Å                                                                          | 9.5645(7)Å                                                                                            |
| b                                 | 34.4906(11)Å                                                                 | 30.994(5)Å                                                                            | 17.1003(12)Å                                                                                          |
| c                                 | 10.0123(3)Å                                                                  | 19.878(3)Å                                                                            | 17.6083(14)Å                                                                                          |
| α                                 |                                                                              |                                                                                       |                                                                                                       |
| β                                 |                                                                              | 91.882(2)°                                                                            |                                                                                                       |
| γ                                 |                                                                              |                                                                                       |                                                                                                       |
| Volume                            | 10945.7(6)Å <sup>3</sup>                                                     | 6194.5(17)Å <sup>3</sup>                                                              | 2879.9(4)Å <sup>3</sup>                                                                               |
| Z                                 | 16                                                                           | 8                                                                                     | 4                                                                                                     |
| Calc. density                     | 1.867Mg/m <sup>3</sup>                                                       | 1.832Mg/m <sup>3</sup>                                                                | 2.030Mg/m <sup>3</sup>                                                                                |
| F(000)                            | 5888                                                                         | 3280                                                                                  | 1696                                                                                                  |
| Linear absorption coefficient μ   | 7.166mm <sup>-1</sup>                                                        | 6.508mm <sup>-1</sup>                                                                 | 5.083mm <sup>-1</sup>                                                                                 |
| Max. and min. transmission        | 1.000 and 0.623                                                              | 0.745 and 0.568                                                                       | 1.000 and 0.655                                                                                       |
| Unit cell determination           | 2.69° < Θ < 35.58°                                                           | 2.41° < Θ < 26.38°                                                                    | 2.31° < Θ < 30.07°                                                                                    |
| Reflections used at 100K          | 9993                                                                         | 9900                                                                                  | 9693                                                                                                  |
| <b>Data collection</b>            |                                                                              |                                                                                       |                                                                                                       |
| Θ range for data collection       | 2.36 to 35.00°                                                               | 2.39 to 25.00°                                                                        | 1.66 to 30.00°                                                                                        |
| Reflections collected/unique      | 29760 / 9364                                                                 | 21524 / 10823                                                                         | 70979 / 8397                                                                                          |
| Significant unique reflections    | 9180 with I > 2σ(I)                                                          | 7283 with I > 2σ(I)                                                                   | 7815 with I > 2σ(I)                                                                                   |
| R(int), R(sigma)                  | 0.0241, 0.0358                                                               | 0.0344, 0.1164                                                                        | 0.0579, 0.0423                                                                                        |
| Completeness to Θ <sub>max</sub>  | 99.9%                                                                        | 99.2%                                                                                 | 100.0%                                                                                                |
| <b>Refinement</b>                 |                                                                              |                                                                                       |                                                                                                       |
| Data/ parameters/ restraints      | 9364 / 331 / 1                                                               | 10823 / 619 / 0                                                                       | 8397 / 333 / 16                                                                                       |
| Goodness-of-fit on F <sup>2</sup> | 1.088                                                                        | 1.042                                                                                 | 1.024                                                                                                 |
| Final R indices [I > 2σ(I)]       | R1 = 0.0221,<br>wR2 = 0.0529                                                 | R1 = 0.0485,<br>wR2 = 0.0941                                                          | R1 = 0.0320,<br>wR2 = 0.0855                                                                          |
| R indices (all data)              | R1 = 0.0227,<br>wR2 = 0.0531                                                 | R1 = 0.0799,<br>wR2 = 0.0979                                                          | R1 = 0.0358,<br>wR2 = 0.0875                                                                          |
| Weighting scheme param. a, b      | 0.0257, 0.6004                                                               | 0.0000, 3.9636                                                                        | 0.0497, 2.9248                                                                                        |
| Largest Δ/σ in last cycle         | 0.002                                                                        | 0.001                                                                                 | 0.001                                                                                                 |
| Largest diff. peak and hole       | 2.894 and -1.243e/Å <sup>3</sup>                                             | 1.762 and -1.800e/Å <sup>3</sup>                                                      | 1.824 and -1.273e/Å <sup>3</sup>                                                                      |
| <b>CCDC no.</b>                   | <b>1987782</b>                                                               | <b>1987783</b>                                                                        | <b>1987784</b>                                                                                        |

**Table S7:** Crystallographic data and structure refinement details of  $[\text{WCl}_3(\text{Tm}^{\text{Me}})] \cdot \text{CDCl}_3$ , *mt-S-S-mt* and  $[\text{WO}(\text{C}_2\text{H}_2)(\text{S}_2\text{CNET}_2)_2]$ .

| Crystal data                          | $[\text{WCl}_3(\text{Tm}^{\text{Me}})] \cdot \text{CDCl}_3$                               | <i>mt-S-S-mt</i>                              | $[\text{WO}(\text{C}_2\text{H}_2)(\text{S}_2\text{CNET}_2)_2]$ |
|---------------------------------------|-------------------------------------------------------------------------------------------|-----------------------------------------------|----------------------------------------------------------------|
| CIF data code                         | CV16B                                                                                     | CV11                                          | AH13                                                           |
| Empirical formula                     | $\text{C}_{12}\text{H}_{16}\text{BCl}_3\text{N}_6\text{S}_3\text{W} \cdot 3\text{CHCl}_3$ | $\text{C}_8\text{H}_{10}\text{N}_4\text{S}_2$ | $\text{C}_{12}\text{H}_{22}\text{N}_2\text{OS}_4\text{W}$      |
| Formula weight                        | 999.60                                                                                    | 226.32                                        | 522.40                                                         |
| Crystal description                   | block, yellow                                                                             | block, yellow                                 | needle, yellow                                                 |
| Crystal size                          | 0.22 x 0.19 x 0.12mm                                                                      | 0.35 x 0.18 x 0.15mm                          | 0.22 x 0.12 x 0.10mm                                           |
| Crystal system                        | trigonal                                                                                  | monoclinic                                    | monoclinic                                                     |
| Space group                           | R 3 c                                                                                     | C 2/c                                         | P 2 <sub>1</sub> /n                                            |
| a                                     | 14.8478(15)Å                                                                              | 12.2450(6)Å                                   | 9.3486(17)Å                                                    |
| b                                     |                                                                                           | 7.3769(4)Å                                    | 15.236(3)Å                                                     |
| c                                     | 26.430(3)Å                                                                                | 11.2441(5)Å                                   | 13.272(3)Å                                                     |
| $\alpha$                              |                                                                                           |                                               |                                                                |
| $\beta$                               |                                                                                           | 98.6227(15)°                                  | 103.312(3)°                                                    |
| $\gamma$                              |                                                                                           |                                               |                                                                |
| Volume                                | 5046.1(14)Å <sup>3</sup>                                                                  | 1004.20(9)Å <sup>3</sup>                      | 1839.6(6)Å <sup>3</sup>                                        |
| Z                                     | 6                                                                                         | 4                                             | 4                                                              |
| Calc. density                         | 1.974Mg/m <sup>3</sup>                                                                    | 1.497Mg/m <sup>3</sup>                        | 1.886Mg/m <sup>3</sup>                                         |
| F(000)                                | 2892                                                                                      | 472                                           | 1016                                                           |
| Linear absorption coefficient $\mu$   | 4.595mm <sup>-1</sup>                                                                     | 0.494mm <sup>-1</sup>                         | 6.730mm <sup>-1</sup>                                          |
| Max. and min. transmission            | 1.000 and 0.570                                                                           | 1.000 and 0.620                               | 1.000 and 0.807                                                |
| Unit cell determination               | 2.21° < $\Theta$ < 27.58°                                                                 | 3.23° < $\Theta$ < 40.84°                     | 2.61° < $\Theta$ < 35.54°                                      |
| Reflections used at 100K              | 6869                                                                                      | 9881                                          | 9915                                                           |
| <b>Data collection</b>                |                                                                                           |                                               |                                                                |
| $\Theta$ range for data collection    | 2.21 to 28.00°                                                                            | 3.23 to 34.99°                                | 2.07 to 35.00°                                                 |
| Reflections collected/unique          | 19539 / 2593                                                                              | 12388 / 2213                                  | 47472 / 8099                                                   |
| Significant unique reflections        | 1473 with $I > 2\sigma(I)$                                                                | 2022 with $I > 2\sigma(I)$                    | 6560 with $I > 2\sigma(I)$                                     |
| R(int), R(sigma)                      | 0.0430, 0.0845                                                                            | 0.0461, 0.0304                                | 0.0495, 0.0339                                                 |
| Completeness to $\Theta_{\text{max}}$ | 100.0%                                                                                    | 100.0%                                        | 100.0%                                                         |
| <b>Refinement</b>                     |                                                                                           |                                               |                                                                |
| Data/ parameters/ restraints          | 2593 / 121 / 2                                                                            | 2213 / 67 / 0                                 | 8099 / 200 / 2                                                 |
| Goodness-of-fit on F <sup>2</sup>     | 1.039                                                                                     | 1.075                                         | 1.037                                                          |
| Final R indices [ $I > 2\sigma(I)$ ]  | R1 = 0.0483,<br>wR2 = 0.0942                                                              | R1 = 0.0346,<br>wR2 = 0.0924                  | R1 = 0.0238,<br>wR2 = 0.0474                                   |
| R indices (all data)                  | R1 = 0.0918,<br>wR2 = 0.1049                                                              | R1 = 0.0378,<br>wR2 = 0.0953                  | R1 = 0.0368,<br>wR2 = 0.0514                                   |
| Weighting scheme param. a, b          | 0.0171, 2.2476                                                                            | 0.0517, 0.7947                                | 0.0145, 1.4190                                                 |
| Largest $\Delta/\sigma$ in last cycle | 0.001                                                                                     | 0.001                                         | 0.002                                                          |
| Largest diff. peak and hole           | 1.203 and -1.079e/Å <sup>3</sup>                                                          | 0.783 and -0.504e/Å <sup>3</sup>              | 1.700 and -1.410e/Å <sup>3</sup>                               |
| <b>CCDC no.</b>                       | <b>1987785</b>                                                                            | <b>1987786</b>                                | <b>1987787</b>                                                 |

## 4.1 Stereoscopic ORTEP plots

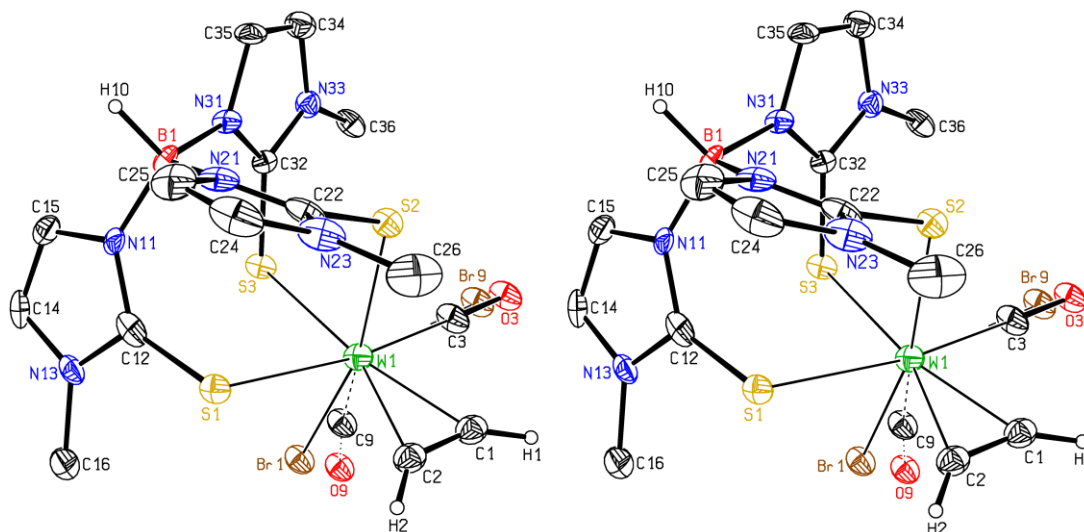

**Figure S68:** Stereoscopic ORTEP<sup>9</sup> plot of  $[\text{W}(\text{CO})(\text{C}_2\text{H}_2)(\text{Tm}^{\text{Me}})\text{Br}]$  (**1**) showing the atomic numbering scheme. The probability ellipsoids are drawn at the 50% probability level. The H atoms of the B–H group and of the acetylene ligand were drawn with arbitrary radii, the other H atoms as well as the solvent molecules were omitted for clarity reasons. The bonds to the atoms of the disordered parts of the complex (e.g. Br9, C9, O9) in the orientations with low site occupation factors of 0.100(2) were plotted with dashed lines.

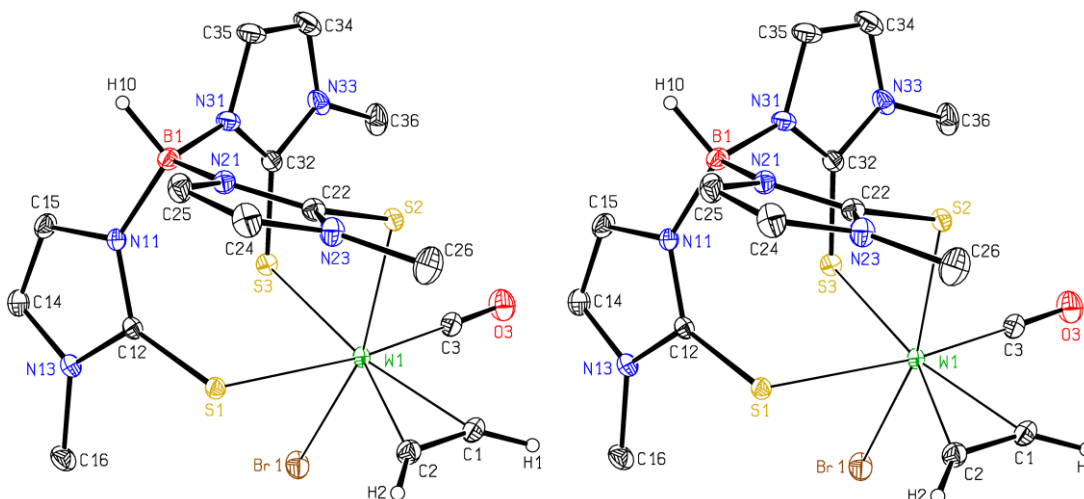

**Figure S69:** Stereoscopic ORTEP<sup>9</sup> plot of  $[\text{W}(\text{CO})(\text{C}_2\text{H}_2)(\text{Tm}^{\text{Me}})\text{Br}]$  (**1'**) showing the atomic numbering scheme. The probability ellipsoids are drawn at the 50% probability level. The H atoms of the acetylene ligand and the hydrido atom were drawn with arbitrary radii, the other H atoms as well as the solvent molecules were omitted for clarity.

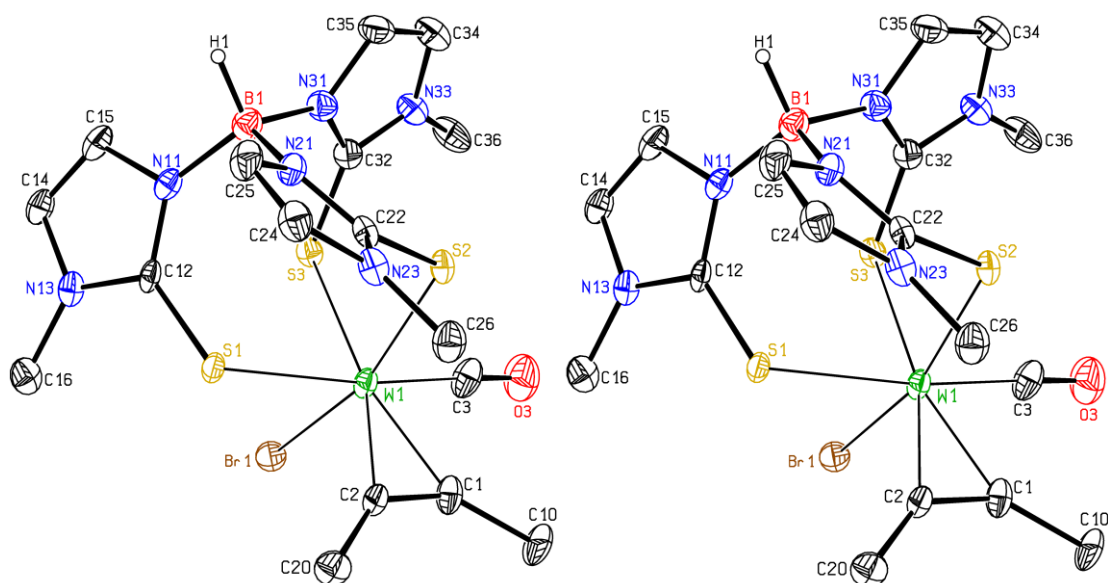

**Figure S70:** Stereoscopic ORTEP<sup>9</sup> plot of  $[\text{W}(\text{CO})(\text{C}_2\text{Me}_2)(\text{Tm}^{\text{Me}})\text{Br}]$  (**2**) showing the atomic numbering scheme. The probability ellipsoids are drawn at the 50% probability level. The H atom H1 is drawn with an arbitrary radius, the other H atoms as well as the solvent molecules were omitted for clarity reasons.

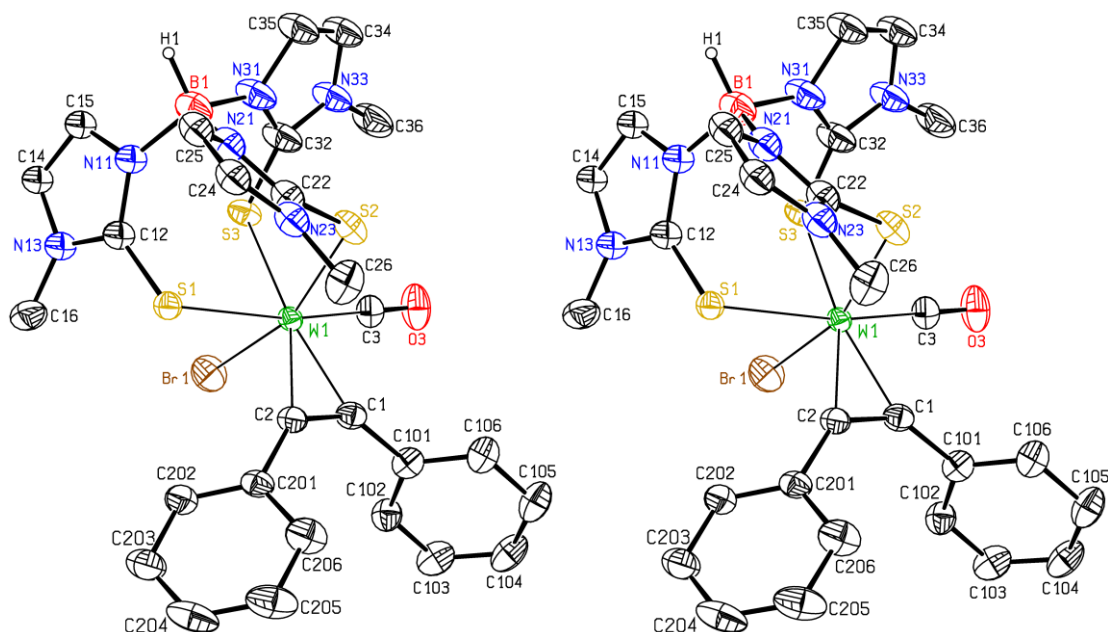

**Figure S71:** Stereoscopic ORTEP<sup>8</sup> plot of  $[\text{W}(\text{CO})(\text{C}_2\text{Ph}_2)(\text{Tm}^{\text{Me}})\text{Br}]$  (**3**) showing the atomic numbering scheme. The probability ellipsoids are drawn at the 50% probability level. The H atom H1 is drawn with an arbitrary radius, the other H atoms as well as the less occupied disordered parts were omitted for clarity reasons.

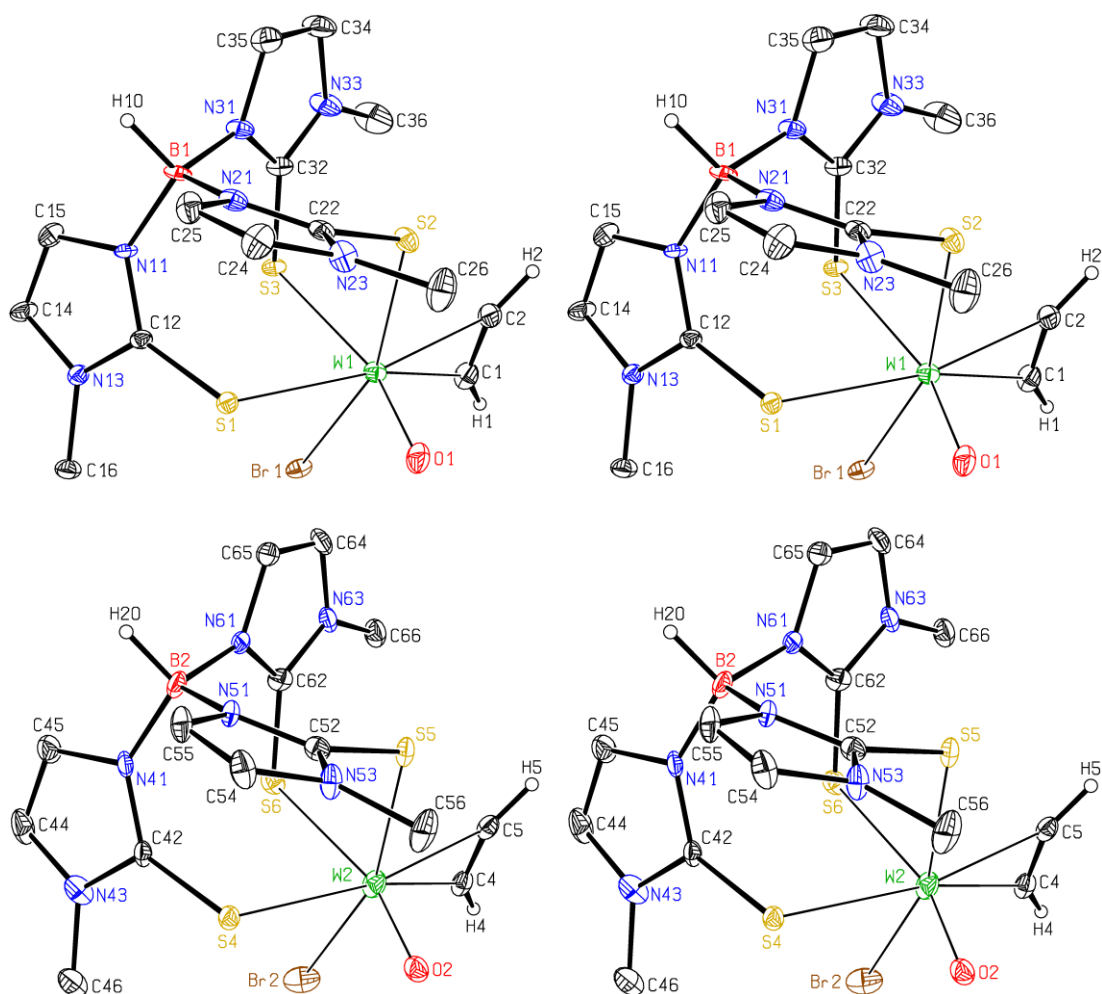

**Figure S72:** Stereoscopic ORTEP<sup>9</sup> plots of the molecules **A** (above) and **B** (below) of  $[\text{WO}(\text{C}_2\text{H}_2)(\text{Tm}^{\text{Me}})\text{Br}]$  (**4**) showing the atomic numbering schemes. The probability ellipsoids are drawn at the 30% probability level. The hydrido atom and the H atoms of the acetylene ligand are drawn with arbitrary radii, the other H atoms were omitted for clarity.

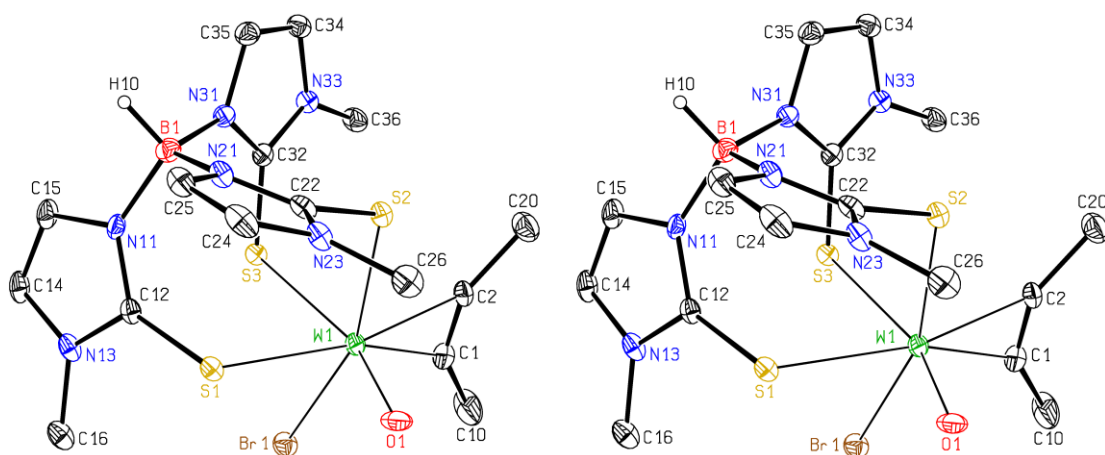

**Figure S73:** Stereoscopic ORTEP<sup>9</sup> plot of  $[\text{WO}(\text{C}_2\text{Me}_2)(\text{Tm}^{\text{Me}})\text{Br}]$  (**5**) showing the atomic numbering scheme. The probability ellipsoids are drawn at the 30% probability level. The hydrido atom is drawn with an arbitrary radius, the other H atoms and the disordered solvent molecules were omitted for clarity.

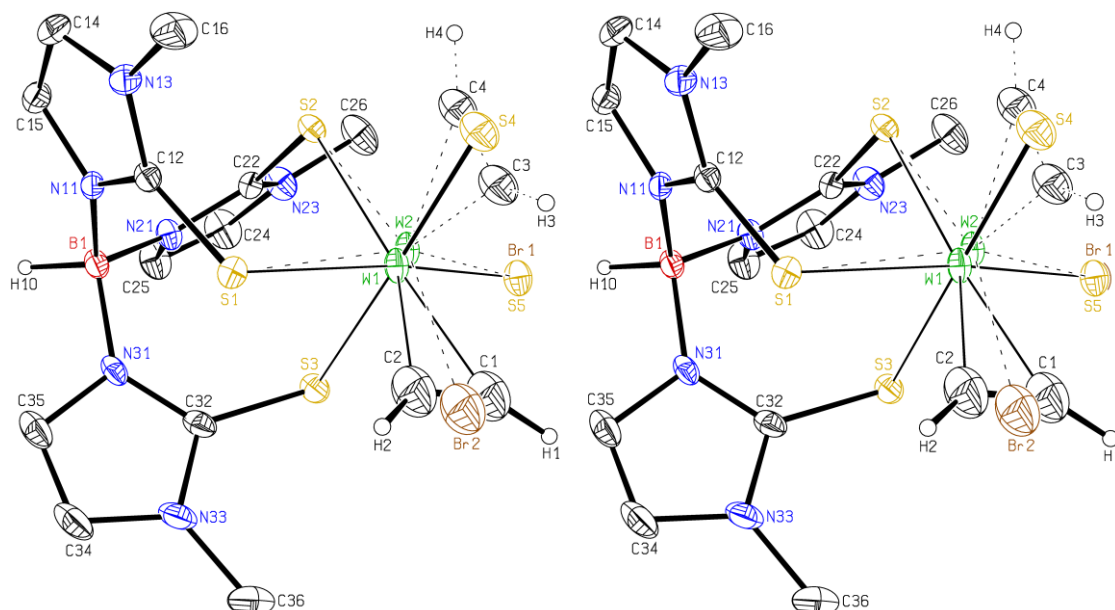

**Figure S74:** ORTEP<sup>9</sup> plot of the metal complex of  $[\text{WS}(\text{C}_2\text{H}_2)(\text{Tm}^{\text{Me}})\text{Br}]$  (**6**) showing the atomic numbering scheme. The probability ellipsoids are drawn at the 50% probability level. The H atoms of the imidazole rings and those of the methyl groups were omitted for clarity, the other H atoms are drawn with arbitrary radii. The bonds of the less prominent occupied orientation of the  $\text{WBrSC}_2\text{H}_2$  fragment [15.12(15)%] are plotted with dashed lines.

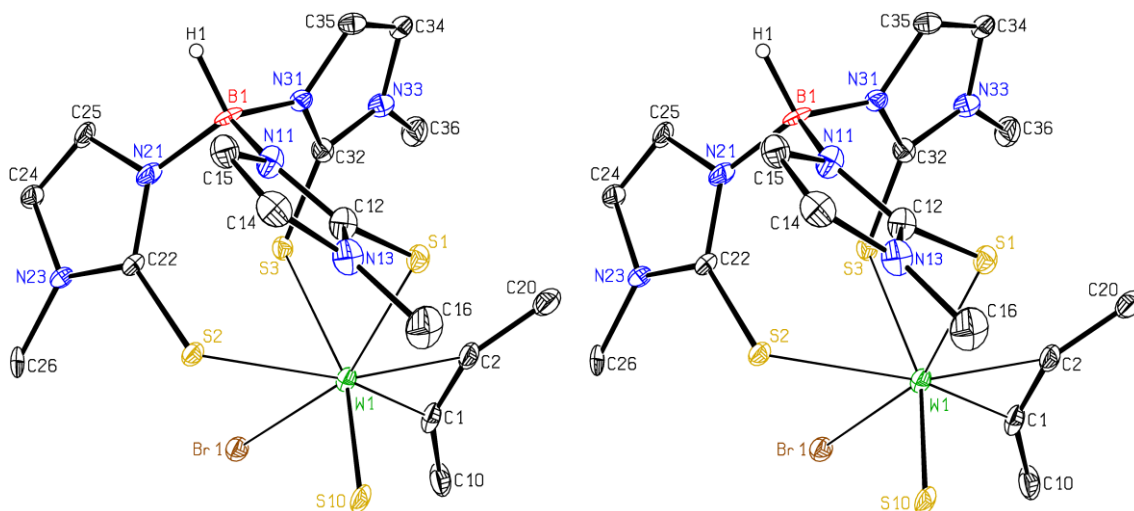

**Figure S75:** Stereoscopic ORTEP<sup>9</sup> plot of  $[\text{WS}(\text{C}_2\text{Me}_2)(\text{Tm}^{\text{Me}})\text{Br}]$  (**7**) showing the atomic numbering scheme. The probability ellipsoids are drawn at the 30% probability level. The H atom H1 is drawn with an arbitrary radius, the other H atoms as well as the solvent molecules were omitted for clarity.

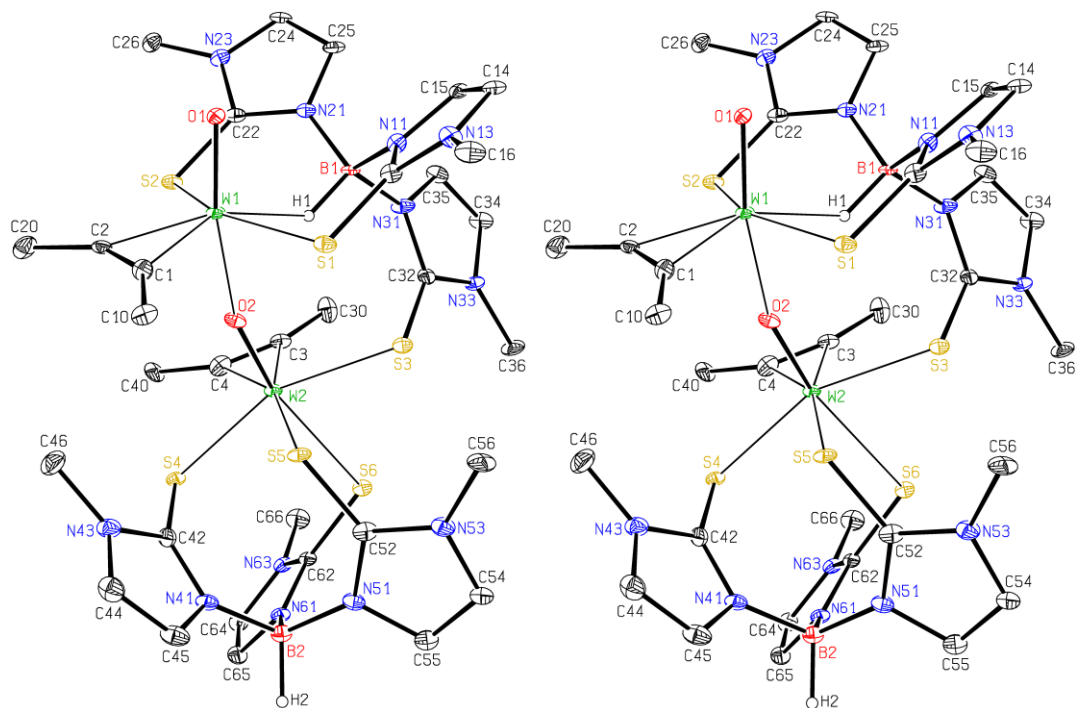

**Figure S76:** Stereoscopic ORTEP<sup>9</sup> plot of the cationic metal complex of  $[\text{WO}(\mu\text{-O})(\text{C}_2\text{Me}_2)_2(\text{Tm}^{\text{Me}})_2](\text{OTf})_2$  (**8**) showing the atomic numbering scheme. The probability ellipsoids are drawn at the 30% probability level. The H atoms bonded to boron are drawn with arbitrary radii, the other H atoms were omitted for clarity.

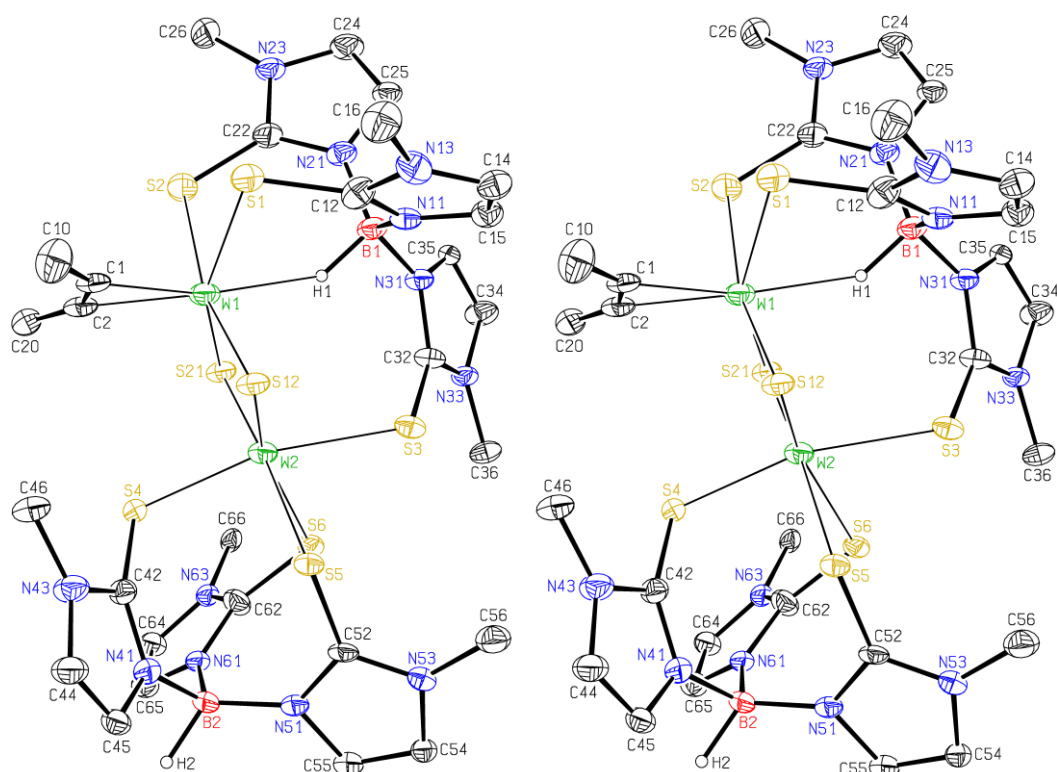

**Figure S77:** Stereoscopic ORTEP<sup>9</sup> plot of the cationic metal complex of  $[\text{W}_2(\mu\text{-S})_2(\text{C}_2\text{Me}_2)(\text{Tm}^{\text{Me}})_2](\text{OTf})_2$  (**9**) showing the atomic numbering scheme. The probability ellipsoids are drawn at the 20% probability level. The H atoms bonded to boron are drawn with arbitrary radii, the other H atoms were omitted for clarity.



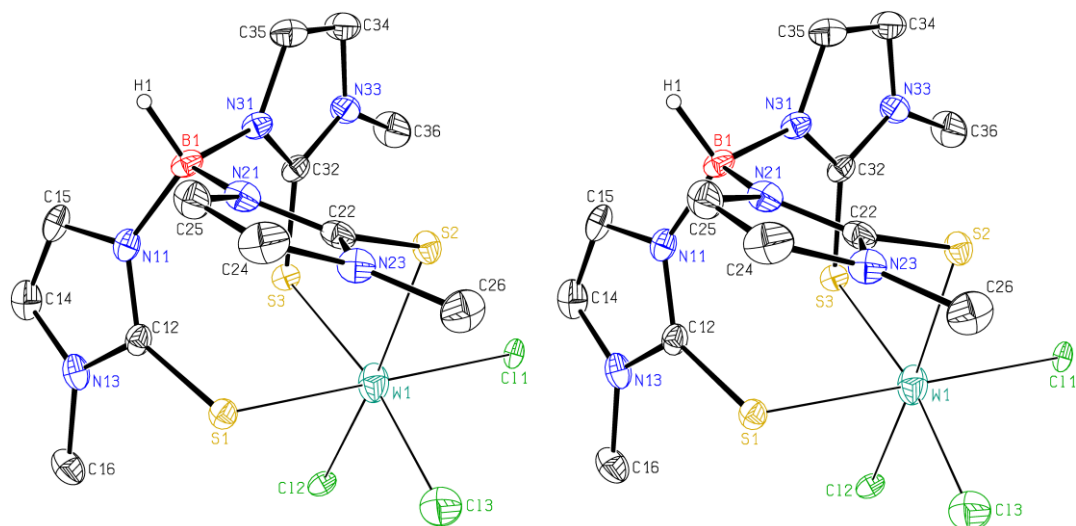

**Figure S78:** Stereoscopic ORTEP<sup>9</sup> plot of  $[\text{WCl}_3(\text{Tm}^{\text{Me}})]$  showing the atomic numbering scheme. The probability ellipsoids are drawn at the 50% probability level. The H atom H1 is drawn with an arbitrary radius, the other H atoms as well as the solvent molecules were omitted for clarity.

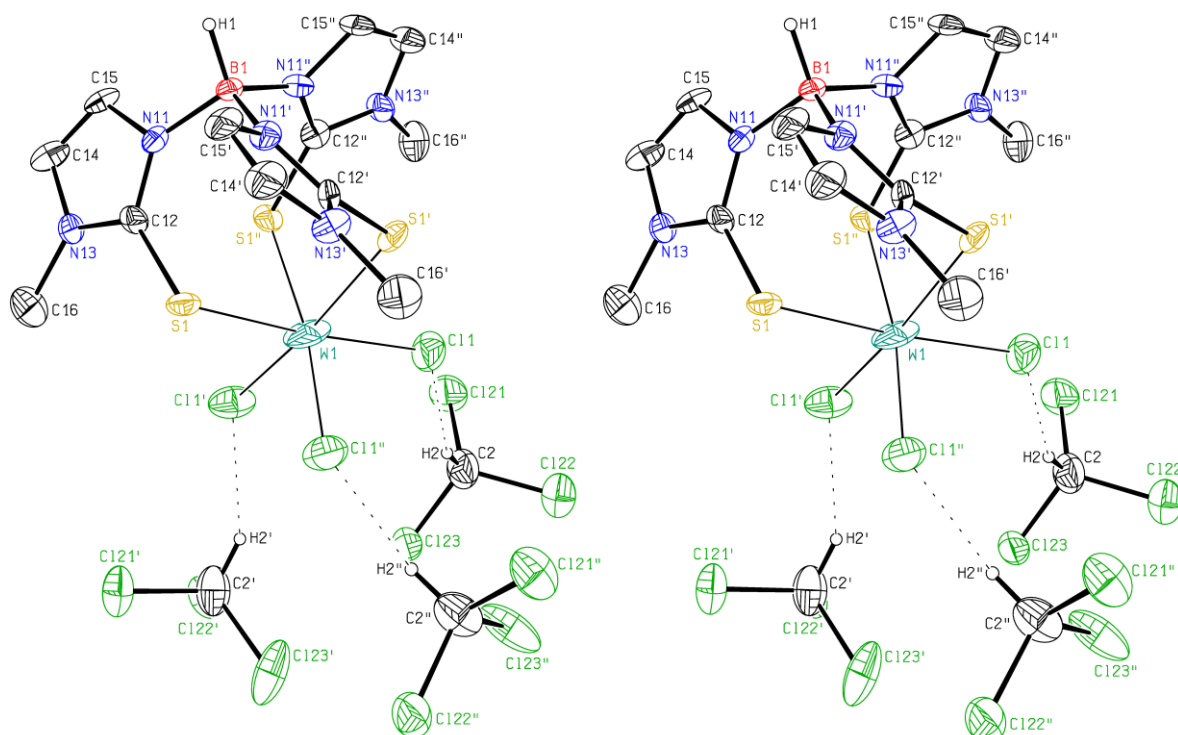

**Figure S79:** Stereoscopic ORTEP<sup>9</sup> plot of  $[\text{WCl}_3(\text{Tm}^{\text{Me}})] \cdot 3 \text{CDCl}_3$  showing the atomic numbering scheme. The probability ellipsoids are drawn at the 30% probability level. The H1 and the H atoms of the coordinating chloroform molecules are drawn with arbitrary radii, the other H atoms were omitted for clarity.

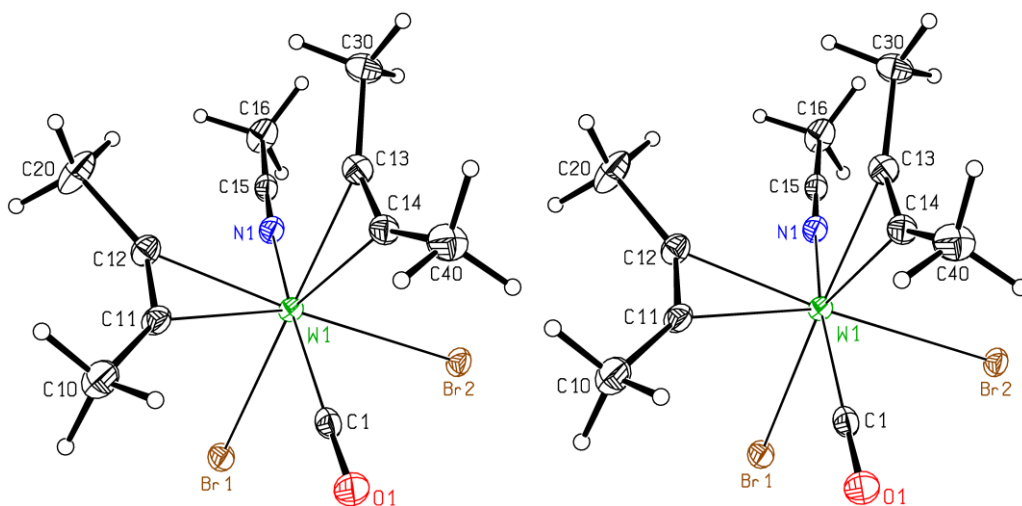

**Figure S80:** Stereoscopic ORTEP<sup>9</sup> plot of  $[\text{W}(\text{CO})(\text{C}_2\text{Me}_2)_2(\text{MeCN})\text{Br}_2]$  showing the atomic numbering scheme. The probability ellipsoids are drawn at the 50% probability level. The H atoms are drawn with arbitrary radii.

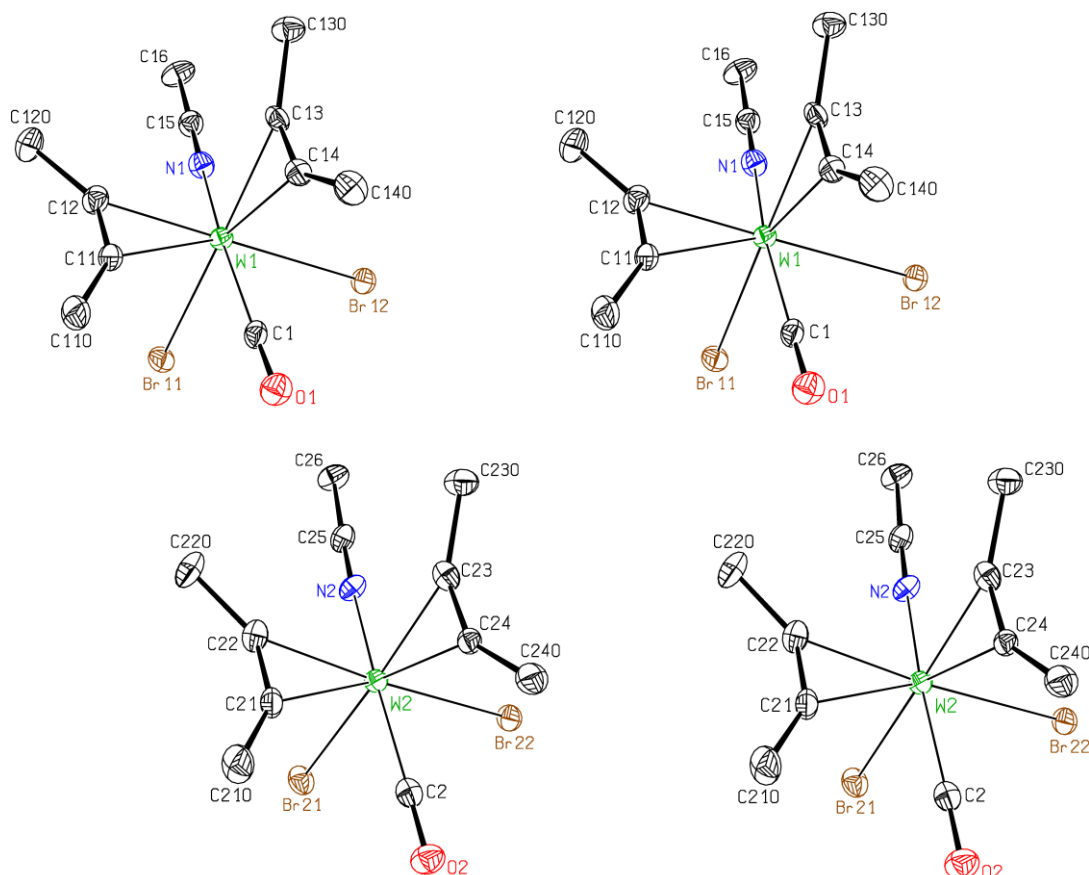

**Figure S81:** Stereoscopic ORTEP<sup>9</sup> plot of the two complexes of the asymmetric unit of  $[\text{W}(\text{CO})(\text{C}_2\text{Me}_2)_2(\text{MeCN})\text{Br}_2]'$  showing the atomic numbering scheme. The probability ellipsoids are drawn at the 50% probability level. The H atoms and the solvent molecule were omitted for clarity.

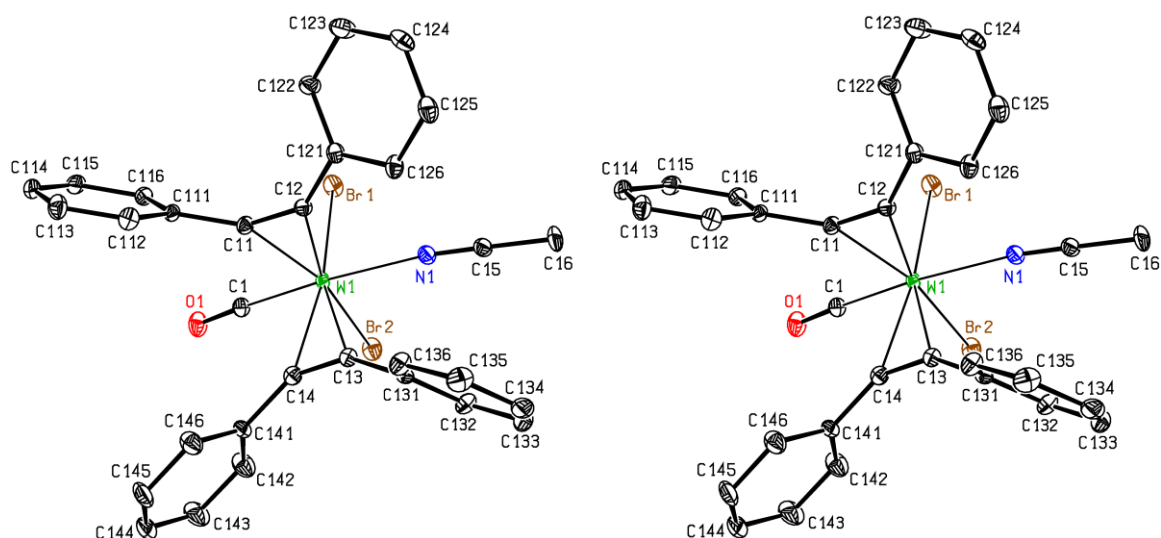

**Figure S82:** Stereoscopic ORTEP<sup>8</sup> plot of  $[\text{W}(\text{CO})(\text{C}_2\text{Ph}_2)_2(\text{MeCN})\text{Br}_2]$  showing the atomic numbering scheme. The probability ellipsoids are drawn at the 50% probability level. The H atoms were omitted for clarity reasons.

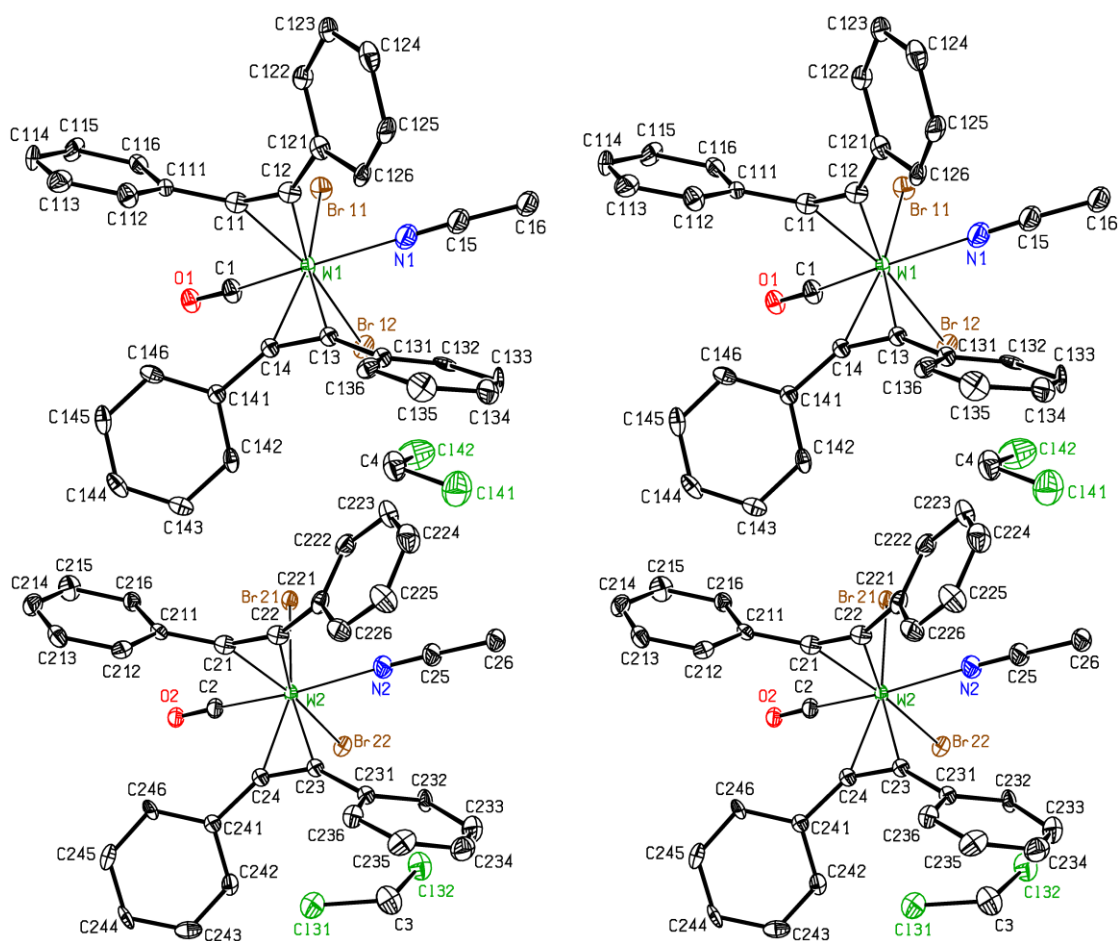

**Figure S83:** Stereoscopic ORTEP<sup>8</sup> plot of  $[\text{W}(\text{CO})(\text{C}_2\text{Ph}_2)_2(\text{MeCN})\text{Br}_2]'$  showing the atomic numbering scheme. The probability ellipsoids are drawn at the 50% probability level. The H atoms were omitted for clarity reasons.

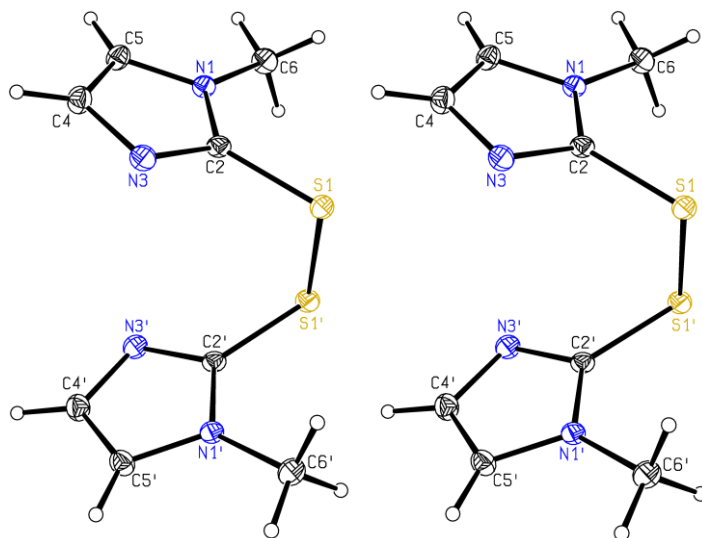

**Figure S84:** Stereoscopic ORTEP<sup>9</sup> plot of *mt-S-S-mt* showing the atomic numbering scheme. The probability ellipsoids are drawn at the 50% probability level. The H atoms are drawn with arbitrary radii.

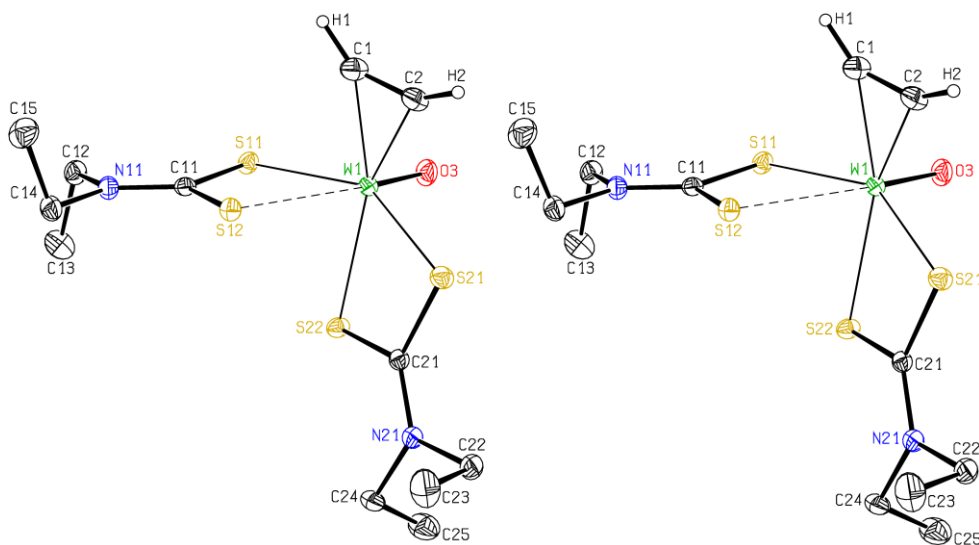

**Figure S85:** Stereoscopic ORTEP<sup>9</sup> plot of  $[\text{WO}(\text{C}_2\text{H}_2)(\text{S}_2\text{CNET}_2)_2]$  showing the atomic numbering scheme. The probability ellipsoids are drawn at the 50% probability level. The H atoms of the acetylene ligand are drawn with arbitrary radii, the other H atoms were omitted for clarity. The rather long W–S bond [2.6962(7)Å] is plotted with a dashed line.

## 4.2 Selected bond lengths and angels

**Table S8:** Selected bond lengths [Å] and angles [°] for **1**.

|        |            |             |            |             |            |
|--------|------------|-------------|------------|-------------|------------|
| W1-C1  | 2.055(4)   | S3-C32      | 1.727(6)   | C15-N11-B1  | 120.7(5)   |
| W1-C2  | 2.050(5)   |             |            | C22-S2-W1   | 108.13(19) |
| W1-C3  | 2.002(8)   | C3-W1-S1    | 171.5(3)   | C22-N21-C25 | 106.7(6)   |
| W1-S1  | 2.5808(16) | S2-W1-Br1   | 162.19(5)  | C22-N21-B1  | 130.8(5)   |
| W1-S2  | 2.3907(15) | C1-W1-S3    | 155.76(16) | C25-N21-B1  | 121.7(6)   |
| W1-S3  | 2.6137(18) | C2-W1-S3    | 163.80(14) | C32-S3-W1   | 107.0(2)   |
| W1-Br1 | 2.6089(7)  | C2-C1-H1    | 147.1(7)   | C32-N31-C35 | 107.5(5)   |
| C1-C2  | 1.252(7)   | W1-C1-H1    | 140.6(6)   | C32-N31-B1  | 130.1(5)   |
| C3-O3  | 1.191(11)  | C1-C2-H2    | 140.5(10)  | C35-N31-B1  | 122.5(5)   |
| B1-N31 | 1.543(8)   | W1-C2-H2    | 146.4(9)   |             |            |
| B1-N21 | 1.550(8)   | O3-C3-W1    | 179.0(9)   | C1-C2-W1-S1 | -177.1(4)  |
| B1-N11 | 1.560(7)   | C12-S1-W1   | 107.1(2)   | C1-C2-W1-C3 | 1.1(7)     |
| S1-C12 | 1.729(8)   | C12-N11-C15 | 108.3(5)   |             |            |
| S2-C22 | 1.746(7)   | C12-N11-B1  | 130.6(5)   |             |            |

**Table S9:** Selected bond lengths [Å] and angles [°] for **1'**.

|        |            |           |             |              |            |
|--------|------------|-----------|-------------|--------------|------------|
| W1-C1  | 2.0531(18) | S3-C32    | 1.727(2)    | C12-S1-W1    | 108.07(6)  |
| W1-C2  | 2.0315(18) |           |             | C22-S2-W1    | 105.99(7)  |
| W1-C3  | 1.954(2)   | C3-W1-S1  | 170.34(6)   | C32-S3-W1    | 105.62(7)  |
| W1-Br1 | 2.5991(2)  | Br1-W1-S2 | 162.525(13) |              |            |
| W1-S1  | 2.6034(5)  | C1-W1-S3  | 155.67(5)   | C1-C2-W1-Br1 | 95.18(12)  |
| W1-S2  | 2.4065(5)  | C2-W1-S3  | 164.51(6)   | C2-C1-W1-Br1 | -89.38(12) |
| W1-S3  | 2.6287(5)  | C2-C1-H1  | 144.0(8)    | C1-C2-W1-C3  | -0.2(5)    |
| C1-C2  | 1.306(3)   | W1-C1-H1  | 145.1(7)    | C2-C1-W1-C3  | 179.8(4)   |
| C3-O3  | 1.156(2)   | C1-C2-H2  | 139.7(4)    | C1-C2-W1-S1  | 178.20(17) |
| S1-C12 | 1.723(2)   | W1-C2-H2  | 148.0(3)    | C2-C1-W1-S1  | -1.98(16)  |
| S2-C22 | 1.7431(19) | O3-C3-W1  | 179.17(19)  |              |            |

**Table S10:** Selected bond lengths [Å] and angles [°] for **2**.

|        |            |           |            |           |            |
|--------|------------|-----------|------------|-----------|------------|
| W1-C1  | 2.050(6)   | C3-O3     | 1.134(7)   | C1-W1-S3  | 154.75(15) |
| W1-C2  | 2.029(6)   | B1-N11    | 1.543(7)   | C2-W1-S3  | 164.79(14) |
| W1-C3  | 1.971(6)   | B1-N21    | 1.551(6)   | C2-C1-C10 | 141.2(6)   |
| W1-S1  | 2.5936(12) | B1-N31    | 1.571(6)   | C1-C2-C20 | 138.5(5)   |
| W1-S2  | 2.4043(13) | S1-C12    | 1.725(5)   | O3-C3-W1  | 177.7(6)   |
| W1-S3  | 2.6330(13) | S2-C22    | 1.758(5)   | C12-S1-W1 | 110.43(16) |
| W1-Br1 | 2.6325(6)  | S3-C32    | 1.726(6)   | C22-S2-W1 | 107.55(17) |
| C1-C2  | 1.314(7)   |           |            | C32-S3-W1 | 107.22(18) |
| C1-C10 | 1.484(7)   | C3-W1-S1  | 171.22(18) |           |            |
| C2-C20 | 1.503(7)   | Br1-W1-S2 | 162.13(4)  |           |            |

**Table S11:** Selected bond lengths [Å] and angles [°] for **3**.

---

|        |           |           |            |
|--------|-----------|-----------|------------|
| W1-C1  | 2.053(5)  | S3-C32    | 1.719(9)   |
| W1-C2  | 2.036(6)  | C1-C2     | 1.343(8)   |
| W1-C3  | 1.944(7)  | C1-C101   | 1.458(6)   |
| W1-S1  | 2.595(2)  | C2-C201   | 1.455(7)   |
| W1-S2  | 2.395(2)  |           |            |
| W1-S3  | 2.612(2)  | C3-W1-S1  | 169.2(2)   |
| W1-Br1 | 2.5832(7) | Br1-W1-S2 | 161.35(19) |
| C3-O3  | 1.164(8)  | C1-W1-S3  | 150.5(2)   |
| B1-N11 | 1.560(16) | C2-W1-S3  | 160.2(2)   |
| B1-N21 | 1.566(12) | O3-C3-W1  | 179.8(7)   |
| B1-N31 | 1.541(15) | C12-S1-W1 | 106.2(6)   |
| S1-C12 | 1.722(9)  | C22-S2-W1 | 109.4(6)   |
| S2-C22 | 1.744(8)  | C32-S3-W1 | 104.7(8)   |

---

**Table S12:** Selected bond lengths [Å] and angles [°] for the two molecules of **4**.

---

|              |            |              |            |
|--------------|------------|--------------|------------|
| W1-O1        | 1.723(6)   | W2-O2        | 1.726(5)   |
| W1-C1        | 2.096(7)   | W2-C4        | 2.097(8)   |
| W1-C2        | 2.106(7)   | W2-C5        | 2.100(8)   |
| W1-Br1       | 2.6171(8)  | W2-Br2       | 2.6164(10) |
| W1-S1        | 2.6210(17) | W2-S4        | 2.5871(19) |
| W1-S2        | 2.4394(19) | W2-S5        | 2.493(2)   |
| W1-S3        | 2.6786(17) | W2-S6        | 2.635(2)   |
| C1-C2        | 1.262(12)  | C4-C5        | 1.242(11)  |
| S1-C12       | 1.732(7)   | S4-C42       | 1.736(7)   |
| S2-C22       | 1.769(7)   | S5-C52       | 1.752(8)   |
| S3-C32       | 1.704(8)   | S6-C62       | 1.726(8)   |
|              |            |              |            |
| C1-W1-S1     | 162.3(2)   | C4-W2-S4     | 161.5(2)   |
| C2-W1-S1     | 162.3(2)   | C5-W2-S4     | 163.5(2)   |
| Br1-W1-S2    | 159.81(5)  | Br2-W2-S5    | 161.21(5)  |
| O1-W1-S3     | 164.65(18) | O2-W2-S6     | 163.60(18) |
| C12-S1-W1    | 110.1(2)   | C42-S4-W2    | 109.0(2)   |
| C22-S2-W1    | 109.1(2)   | C52-S5-W2    | 107.2(2)   |
| C32-S3-W1    | 107.1(3)   | C62-S6-W2    | 106.4(2)   |
|              |            |              |            |
| C1-C2-W1-Br1 | -14.3(5)   | C4-C5-W2-Br2 | -10.6(5)   |
| C2-C1-W1-Br1 | 166.6(5)   | C5-C4-W2-Br2 | 169.9(5)   |
| C1-C2-W1-O1  | 89.4(5)    | C4-C5-W2-O2  | 94.3(5)    |
| C2-C1-W1-O1  | -97.3(5)   | C5-C4-W2-O2  | -93.8(5)   |
| C1-C2-W1-S2  | -174.2(5)  | C4-C5-W2-S5  | -172.1(5)  |
| C2-C1-W1-S2  | 5.9(5)     | C5-C4-W2-S5  | 8.1(5)     |

---

**Table S13:** Selected bond lengths [Å] and angles [°] for **5**.

---

|        |            |           |            |              |           |
|--------|------------|-----------|------------|--------------|-----------|
| W1-O1  | 1.791(4)   | C1-W1-S1  | 162.12(17) | C1-C2-W1-Br1 | -16.9(4)  |
| W1-C1  | 2.077(6)   | C2-W1-S1  | 162.86(16) | C2-C1-W1-Br1 | 164.2(4)  |
| W1-C2  | 2.114(5)   | Br1-W1-S2 | 160.13(4)  | C1-C2-W1-O1  | 87.8(4)   |
| W1-Br1 | 2.5984(6)  | O1-W1-S3  | 162.07(14) | C2-C1-W1-O1  | -99.0(4)  |
| W1-S1  | 2.6847(15) | C2-C1-C10 | 142.8(6)   | C1-C2-W1-S2  | -177.7(4) |
| W1-S2  | 2.4343(13) | C10-C1-W1 | 143.0(5)   | C2-C1-W1-S2  | 2.4(4)    |
| W1-S3  | 2.6501(13) | C1-C2-C20 | 144.3(6)   |              |           |
| C1-C2  | 1.255(8)   | C20-C2-W1 | 144.7(4)   |              |           |
| B1-H10 | 1.04(6)    | C12-S1-W1 | 111.23(18) |              |           |
| S1-C12 | 1.720(6)   | C22-S2-W1 | 107.26(17) |              |           |
| S2-C22 | 1.750(6)   | C32-S3-W1 | 107.14(17) |              |           |
| S3-C32 | 1.737(5)   |           |            |              |           |

---

**Table S14:** Selected bond lengths [Å] and angles [°] for **6**.

---

|        |            |           |            |              |            |
|--------|------------|-----------|------------|--------------|------------|
| W1-C1  | 2.098(7)   | C1-W1-S2  | 163.8(2)   | C1-C2-W1-Br1 | 7.3(5)     |
| W1-C2  | 2.132(6)   | C2-W1-S2  | 159.20(19) | C2-C1-W1-Br1 | -173.4(5)  |
| W1-S1  | 2.3907(10) | S3-W1-S4  | 164.61(5)  | C1-C2-W1-S4  | -93.3(4)   |
| W1-S2  | 2.6328(10) | S1-W1-Br1 | 160.97(5)  | C2-C1-W1-S4  | 94.5(4)    |
| W1-S3  | 2.6398(10) | C3-W2-S3  | 155.0(8)   | C1-C2-W1-S1  | 168.2(5)   |
| W1-S4  | 2.1497(13) | C4-W2-S3  | 167.3(9)   | C2-C1-W1-S1  | -11.7(5)   |
| W1-Br1 | 2.6490(9)  | S1-W2-S5  | 161.8(10)  | C3-C4-W2-Br2 | 7.9(20)    |
| C1-C2  | 1.248(9)   | S2-W2-Br2 | 162.19(13) | C4-C3-W2-Br2 | -172.0(19) |
| B1-N11 | 1.547(5)   | C12-S1-W1 | 110.32(13) | C3-C4-W2-S5  | -92.1(18)  |
| B1-N21 | 1.545(5)   | C22-S2-W1 | 110.31(13) | C4-C3-W2-S5  | 97.1(20)   |
| B1-N31 | 1.546(5)   | C32-S3-W1 | 105.87(14) | C3-C4-W2-S2  | 170.5(18)  |
| S1-C12 | 1.736(4)   |           |            | C4-C3-W2-S2  | -10.2(20)  |
| S2-C22 | 1.727(4)   |           |            |              |            |
| S3-C32 | 1.730(4)   |           |            |              |            |

---

**Table S15:** Selected bond lengths [Å] and angles [°] for **7**.

---

|        |            |           |            |               |           |
|--------|------------|-----------|------------|---------------|-----------|
| W1-C1  | 2.069(7)   | B1-N31    | 1.546(9)   | C22-S2-W1     | 110.6(2)  |
| W1-C2  | 2.118(7)   | S1-C12    | 1.726(7)   | C32-S3-W1     | 108.3(2)  |
| W1-S10 | 2.1730(18) | S2-C22    | 1.739(7)   |               |           |
| W1-Br1 | 2.6190(8)  | S3-C32    | 1.729(6)   | C10-C1-C2-C20 | 2(2)      |
| W1-S1  | 2.4384(16) |           |            | C1-C2-W1-Br1  | 27.3(5)   |
| W1-S2  | 2.6351(17) | S1-W1-Br1 | 158.11(5)  | C1-C2-W1-S1   | -174.7(5) |
| W1-S3  | 2.6755(18) | S2-W1-C1  | 161.72(19) | C2-C1-W1-Br1  | -154.4(5) |
| C1-C2  | 1.240(9)   | S2-W1-C2  | 161.41(19) | C2-C1-W1-S1   | 5.5(5)    |
| C1-C10 | 1.483(10)  | S3-W1-S10 | 163.37(6)  | W1-S1-C12-N11 | 84.3(6)   |
| C2-C20 | 1.444(10)  | C2-C1-C10 | 142.4(7)   | W1-S2-C22-N21 | 74.8(6)   |
| B1-N11 | 1.567(8)   | C1-C2-C20 | 145.3(7)   | W1-S3-C32-N31 | 73.6(6)   |
| B1-N21 | 1.557(7)   | C12-S1-W1 | 109.0(2)   |               |           |

---

**Table S16:** Selected bond lengths [Å] and angles [°] for **8**.

|       |           |          |           |           |           |
|-------|-----------|----------|-----------|-----------|-----------|
| W1-O1 | 1.715(6)  | W2-S6    | 2.611(2)  | W1-O2-W2  | 163.3(4)  |
| W1-C1 | 2.097(10) | C1-C2    | 1.265(13) | C2-C1-C10 | 146.9(10) |
| W1-C2 | 2.092(9)  | C3-C4    | 1.256(14) | C1-C2-C20 | 147.6(9)  |
| W1-O2 | 2.157(6)  |          |           | C12-S1-W1 | 97.9(3)   |
| W1-S1 | 2.470(3)  | O1-W1-O2 | 165.9(3)  | C22-S2-W1 | 96.5(3)   |
| W1-S2 | 2.508(2)  | S1-W1-S2 | 150.99(8) | C32-S3-W2 | 112.3(3)  |
| W1-H1 | 2.081     | C1-W1-H1 | 148.7     | C4-C3-C30 | 140.4(9)  |
| W2-O2 | 1.772(6)  | C2-W1-H1 | 150.7     | C3-C4-C40 | 144.5(10) |
| W2-C3 | 2.107(9)  | B1-H1-W1 | 131.3     | C42-S4-W2 | 109.2(3)  |
| W2-C4 | 2.120(10) | S3-W2-S4 | 155.97(7) | C52-S5-W2 | 109.2(3)  |
| W2-S3 | 2.540(2)  | C3-W2-S5 | 166.2(3)  | C62-S6-W2 | 104.7(3)  |
| W2-S4 | 2.425(2)  | C4-W2-S5 | 158.8(3)  |           |           |
| W2-S5 | 2.642(2)  | O2-W2-S6 | 159.2(2)  |           |           |

**Table S17:** Selected bond lengths [Å] and angles [°] for **9**.

|        |           |           |            |           |           |
|--------|-----------|-----------|------------|-----------|-----------|
| W1-C1  | 2.072(10) | C10-C1    | 1.464(15)  | S3-W2-S4  | 162.31(8) |
| W1-C2  | 2.078(12) | C2-C20    | 1.453(17)  | S21-W2-S5 | 173.30(8) |
| W1-S12 | 2.326(2)  | B1-N11    | 1.481(11)  | S12-W2-S6 | 160.72(8) |
| W1-S21 | 2.380(2)  | B1-N31    | 1.503(13)  | C2-C1-C10 | 146.1(12) |
| W1-S1  | 2.510(3)  | B1-N21    | 1.525(10)  | C1-C2-C20 | 149.4(12) |
| W1-S2  | 2.502(3)  | B2-N41    | 1.502(13)  | W2-S12-W1 | 75.79(8)  |
| W1-H1  | 2.129(15) | B2-N51    | 1.510(10)  | W2-S21-W1 | 74.86(8)  |
| W2-S21 | 2.254(3)  | B2-N61    | 1.543(10)  | C12-S1-W1 | 101.8(4)  |
| W2-S12 | 2.262(2)  |           |            | C22-S2-W1 | 107.7(4)  |
| W2-S3  | 2.495(3)  | S21-W1-S1 | 153.38(10) | C32-S3-W2 | 113.0(4)  |
| W2-S4  | 2.377(2)  | S12-W1-S2 | 166.78(10) | C42-S4-W2 | 105.5(3)  |
| W2-S5  | 2.466(2)  | C1-W1-H1  | 163.2(5)   | C52-S5-W2 | 113.4(3)  |
| W2-S6  | 2.600(2)  | C2-W1-H1  | 155.0(4)   | C62-S6-W2 | 110.2(4)  |
| C1-C2  | 1.313(15) | B1-H1-W1  | 141.2(12)  |           |           |

**Table S18:** Selected bond lengths [Å] and angles [°] for **[WCl<sub>3</sub>Tm<sup>Me</sup>]**.

|        |            |        |          |           |            |
|--------|------------|--------|----------|-----------|------------|
| W1-Cl1 | 2.4354(12) | B1-N21 | 1.543(7) | Cl1-W1-S1 | 176.13(5)  |
| W1-Cl2 | 2.4261(13) | B1-N31 | 1.564(7) | Cl2-W1-S2 | 169.52(5)  |
| W1-Cl3 | 2.3176(16) | S1-C12 | 1.741(6) | Cl3-W1-S3 | 170.59(5)  |
| W1-S1  | 2.5019(14) | S2-C22 | 1.754(6) | C12-S1-W1 | 106.3(2)   |
| W1-S2  | 2.4278(15) | S3-C32 | 1.732(6) | C22-S2-W1 | 105.00(19) |
| W1-S3  | 2.4949(14) |        |          | C32-S3-W1 | 107.11(19) |
| B1-N11 | 1.556(8)   |        |          |           |            |



**Table S19:** Selected bond lengths [Å] and angles [°] for [WCl<sub>3</sub>Tm<sup>Me</sup>] · 3 CDCl<sub>3</sub>.

---

|        |          |        |           |           |           |
|--------|----------|--------|-----------|-----------|-----------|
| W1-Cl1 | 2.356(4) | B1-N11 | 1.559(10) | Cl1-W1-S1 | 170.74(9) |
| W1-S1  | 2.488(3) | S1-C12 | 1.733(10) | C12-S1-W1 | 107.6(3)  |

---

**Table S20:** Selected bond lengths [Å] and angles [°] for [W(CO)(C<sub>2</sub>Me<sub>2</sub>)<sub>2</sub>(MeCN)Br<sub>2</sub>].

---

|        |          |        |           |            |            |
|--------|----------|--------|-----------|------------|------------|
| W1-C1  | 2.020(3) | W1-Br1 | 2.6456(4) | C1-W1-N1   | 163.45(12) |
| W1-C11 | 2.114(3) | W1-Br2 | 2.6817(4) | C13-W1-Br1 | 162.09(10) |
| W1-C12 | 2.070(3) | C1-O1  | 1.136(4)  | C14-W1-Br1 | 158.25(9)  |
| W1-C13 | 2.080(3) |        |           | C11-W1-Br2 | 158.64(9)  |
| W1-C14 | 2.127(3) |        |           | C12-W1-Br2 | 163.35(10) |
| W1-N1  | 2.185(3) |        |           | O1-C1-W1   | 177.5(3)   |

---

**Table S21:** Selected bond lengths [Å] and angles [°] for the two complexes of [W(CO)(C<sub>2</sub>Me<sub>2</sub>)<sub>2</sub>(MeCN)Br<sub>2</sub>].

---

|                   |            |                   |            |
|-------------------|------------|-------------------|------------|
| W1-C1             | 2.015(5)   | W2-C2             | 2.000(5)   |
| W1-C11            | 2.122(4)   | W2-C21            | 2.130(5)   |
| W1-C12            | 2.069(5)   | W2-C22            | 2.076(5)   |
| W1-C13            | 2.079(5)   | W2-C23            | 2.070(5)   |
| W1-C14            | 2.131(5)   | W2-C24            | 2.131(5)   |
| W1-N1             | 2.166(4)   | W2-N2             | 2.175(4)   |
| W1-Br11           | 2.6668(5)  | W2-Br21           | 2.6600(5)  |
| W1-Br12           | 2.6591(5)  | W2-Br22           | 2.6684(5)  |
| C1-O1             | 1.132(6)   | C2-O2             | 1.142(6)   |
| C1-W1-N1          | 164.95(17) | C2-W2-N2          | 164.40(17) |
| C13-W1-Br11       | 161.77(13) | C23-W2-Br21       | 161.63(13) |
| C14-W1-Br11       | 159.51(13) | C24-W2-Br21       | 157.82(12) |
| C11-W1-Br12       | 155.44(13) | C21-W2-Br22       | 157.36(13) |
| C12-W1-Br12       | 164.25(14) | C22-W2-Br22       | 163.84(13) |
| O1-C1-W1          | 177.8(4)   | O2-C2-W2          | 178.0(4)   |
| C12-C11-C110      | 148.3(5)   | C22-C21-C210      | 146.4(5)   |
| C11-C12-C120      | 144.9(5)   | C21-C22-C220      | 144.5(5)   |
| C14-C13-C130      | 146.7(5)   | C24-C23-C230      | 145.9(5)   |
| C13-C14-C140      | 147.8(5)   | C23-C24-C240      | 148.6(5)   |
| C110-C11-C12-C120 | -2.1(15)   | C210-C21-C22-C220 | -1.7(14)   |
| C130-C13-C14-C140 | 3.2(14)    | C230-C23-C24-C240 | -1.1(14)   |

---

**Table S 22:** Selected bond lengths [Å] and angles [°] for **[W(CO)(C<sub>2</sub>Ph<sub>2</sub>)<sub>2</sub>(MeCN)Br<sub>2</sub>]**.

---

|         |           |              |            |
|---------|-----------|--------------|------------|
| W1-C1   | 2.026(3)  | C1-W1-N1     | 160.06(12) |
| W1-C11  | 2.097(3)  | C13-W1-Br1   | 161.56(9)  |
| W1-C12  | 2.081(3)  | C14-W1-Br1   | 159.27(8)  |
| W1-C13  | 2.105(3)  | C11-W1-Br2   | 153.79(8)  |
| W1-C14  | 2.130(3)  | C12-W1-Br2   | 165.27(9)  |
| W1-N1   | 2.168(3)  | Br1-W1-Br2   | 82.71(3)   |
| W1-Br1  | 2.6351(4) | O1-C1-W1     | 177.3(3)   |
| W1-Br2  | 2.6455(4) |              |            |
| C1-O1   | 1.135(4)  | C12-C11-C111 | 145.8(3)   |
| C11-C12 | 1.304(4)  | C11-C12-C121 | 141.9(3)   |
| C13-C14 | 1.283(4)  | C14-C13-C131 | 147.4(3)   |
| N1-C15  | 1.135(4)  | C13-C14-C141 | 146.7(3)   |
| C15-C16 | 1.451(5)  |              |            |

---

**Table S23:** Selected bond lengths [Å] and angles [°] for the two molecules of **[W(CO)(C<sub>2</sub>Ph<sub>2</sub>)<sub>2</sub>(MeCN)Br<sub>2</sub>]<sup>+</sup>**.

---

|              |            |              |            |
|--------------|------------|--------------|------------|
| W1-C1        | 2.039(10)  | W2-C2        | 2.042(10)  |
| W1-C12       | 2.078(9)   | W2-C21       | 2.125(9)   |
| W1-C13       | 2.086(9)   | W2-C22       | 2.128(9)   |
| W1-C14       | 2.107(9)   | W2-C23       | 2.039(9)   |
| W1-C11       | 2.108(9)   | W2-C24       | 2.106(9)   |
| W1-N1        | 2.165(8)   | W2-N2        | 2.165(8)   |
| W1-Br11      | 2.6359(10) | W2-Br21      | 2.6678(10) |
| W1-Br12      | 2.6714(10) | W2-Br22      | 2.6339(10) |
| C1-O1        | 1.147(10)  | C2-O2        | 1.137(10)  |
| C11-C12      | 1.279(12)  | C21-C22      | 1.302(12)  |
| C13-C14      | 1.309(11)  | C23-C24      | 1.270(11)  |
| N1-C15       | 1.120(11)  | N2-C25       | 1.142(11)  |
| C15-C16      | 1.462(13)  | C25-C26      | 1.466(12)  |
|              |            |              |            |
| C1-W1-N1     | 157.3(3)   | C2-W2-N2     | 160.3(3)   |
| C13-W1-Br11  | 161.2(2)   | C23-W2-Br21  | 165.2(3)   |
| C14-W1-Br11  | 156.0(2)   | C24-W2-Br21  | 156.4(2)   |
| C11-W1-Br12  | 160.0(3)   | C21-W2-Br22  | 161.4(3)   |
| C12-W1-Br12  | 163.4(3)   | C22-W2-Br22  | 159.9(2)   |
| Br11-W1-Br12 | 83.20(3)   | Br21-W2-Br22 | 85.17(3)   |
| O1-C1-W1     | 175.8(8)   | O2-C2-W2     | 176.1(9)   |
| C12-C11-C111 | 143.5(9)   | C22-C21-C211 | 144.5(9)   |
| C11-C12-C121 | 141.9(9)   | C21-C22-C221 | 153.2(9)   |
| C14-C13-C131 | 146.5(9)   | C24-C23-C231 | 141.1(9)   |
| C13-C14-C141 | 142.3(9)   | C23-C24-C241 | 143.2(9)   |

---

**Table S24:** Selected bond lengths [Å] and angles [°] for **mt-S-S-mt**.

---

|                        |           |          |           |                                          |           |
|------------------------|-----------|----------|-----------|------------------------------------------|-----------|
| S1-C2                  | 1.7389(9) | N3-C2-N1 | 111.64(8) | C2-S1-S1 <sup>i)</sup> -C2 <sup>i)</sup> | -62.29(4) |
| S1-S1 <sup>i)</sup>    | 2.1003(5) | N3-C2-S1 | 123.75(6) | S1 <sup>i)</sup> -S1-C2-N3               | 101.18(8) |
| C2-S1-S1 <sup>i)</sup> | 101.60(3) | N1-C2-S1 | 124.59(7) | S1 <sup>i)</sup> -S1-C2-N1               | -77.03(8) |

---

Symmetry transformations used to generate equivalent atoms:

<sup>i)</sup> 1-x, y, 3/2-z**Table S25:** Selected bond lengths [Å] and angles [°] for **[WO(C<sub>2</sub>H<sub>2</sub>)(S<sub>2</sub>CNEt<sub>2</sub>)<sub>2</sub>]**

---

|         |            |            |             |
|---------|------------|------------|-------------|
| W1-C1   | 2.092(2)   | S11-W1-S21 | 146.764(18) |
| W1-C2   | 2.112(2)   | C1-W1-S22  | 160.06(7)   |
| W1-O3   | 1.7137(16) | C2-W1-S22  | 148.79(6)   |
| W1-S11  | 2.5302(6)  | O3-W1-S12  | 159.20(6)   |
| W1-S12  | 2.6962(7)  | S12-W1-S22 | 79.37(2)    |
| W1-S21  | 2.4379(6)  | C2-C1-H1   | 141.6(8)    |
| W1-S22  | 2.5397(6)  | C1-C2-H2   | 148.2(5)    |
| C1-C2   | 1.282(3)   | C11-S11-W1 | 91.31(7)    |
| S11-C11 | 1.737(2)   | C11-S12-W1 | 86.45(7)    |
| S12-C11 | 1.710(2)   | C21-S21-W1 | 90.22(7)    |
| S21-C21 | 1.743(2)   | C21-S22-W1 | 87.46(7)    |
| S22-C21 | 1.717(2)   |            |             |

---

## 5 REFERENCES

---

- [1] J. S. Figueroa, K. Yurkerwich, J. Melnick, D. Buccella, G. Parkin, *Inorg. Chem.* **2007**, *46*, 9234–9244.
- [2] L. M. Peschel, J. A. Schachner, C. H. Sala, F. Belaj, N. C. Mösch-Zanetti, *Z. anorg. allg. Chem.* **2013**, *639*, 1559–1567.
- [3] A. Braendle, C. Vidovič, N. C. Mösch-Zanetti, M. Niederberger, W. Caseri, *Polymers* **2018**, *10*, 881.
- [4] P. K. Baker, D. J. Muldoon, A. J. Lavery, A. Shawcross, *Polyhedron* **1994**, *13*, 2915–2921.
- [5] C. Vidovič, L. M. Peschel, M. Buchsteiner, F. Belaj, N. C. Mösch-Zanetti, *Chem. Eur. J.* **2019**, *25*, 14267–14272.
- [6] M. Garner, M.-A. Lehmann, J. Reglinski, M. D. Spicer, *Organometallics* **2001**, *20*, 5233–5236.
- [7] Sheldrick, G. M. A short history of SHELX. *Acta Crystallogr. Sec. A, Found. Crystallogr.* **2008**, *64*, 112–122.
- [8] Sheldrick, G. M. *Acta Cryst.* **2015**, *C71*, 3-8.
- [9] Johnson, C. K. ORTEP. Report ORNL-3794. Oak Ridge National Laboratory, Tennessee, USA, **1965**.
